# Supplementary material for: Mental health consequences of COVID-19: a nationally representative cross-sectional study of pandemic-related stressors and anxiety disorders in the USA
Source: PubMed Central journal article supplement — BMJ Open. 2021 Aug 9;11(8):e044125. doi: 10.1136/bmjopen-2020-044125 (PMC8354762; doi:10.1136/bmjopen-2020-044125), 2021-08-09
Supplement: bmjopen-2020-044125.draft_revisions.pdf [file bmjopen-2020-044125.draft_revisions.pdf]

# BMJ Open

BMJ Open is committed to open peer review. As part of this commitment we make the peer review history of every article we publish publicly available.

When an article is published we post the peer reviewers' comments and the authors' responses online. We also post the versions of the paper that were used during peer review. These are the versions that the peer review comments apply to.

The versions of the paper that follow are the versions that were submitted during the peer review process. They are not the versions of record or the final published versions. They should not be cited or distributed as the published version of this manuscript.

BMJ Open is an open access journal and the full, final, typeset and author-corrected version of record of the manuscript is available on our site with no access controls, subscription charges or pay-per-view fees (<http://bmjopen.bmj.com>).

If you have any questions on BMJ Open's open peer review process please email [info.bmjopen@bmj.com](mailto:info.bmjopen@bmj.com)

# BMJ Open

## **The mental health consequences of COVID-19: a nationally representative cross-sectional study of pandemic-related stressors and anxiety disorders in the United States.**

|                               |                                                                                                                                                                                                                                                                                                                                        |
|-------------------------------|----------------------------------------------------------------------------------------------------------------------------------------------------------------------------------------------------------------------------------------------------------------------------------------------------------------------------------------|
| Journal:                      | <i>BMJ Open</i>                                                                                                                                                                                                                                                                                                                        |
| Manuscript ID                 | bmjopen-2020-044125                                                                                                                                                                                                                                                                                                                    |
| Article Type:                 | Original research                                                                                                                                                                                                                                                                                                                      |
| Date Submitted by the Author: | 31-Aug-2020                                                                                                                                                                                                                                                                                                                            |
| Complete List of Authors:     | Abdalla, Salma; Boston University School of Public Health, Epidemiology<br>Ettman, Catherine; Boston University School of Public Health, Epidemiology; Brown University School of Public Health<br>Cohen, Gregory; Boston University School of Public Health, Epidemiology<br>Galea, Sandro; Boston University School of Public Health |
| Keywords:                     | MENTAL HEALTH, COVID-19, Anxiety disorders < PSYCHIATRY                                                                                                                                                                                                                                                                                |
|                               |                                                                                                                                                                                                                                                                                                                                        |

SCHOLARONE™  
Manuscripts

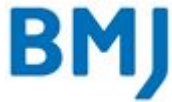

I, the Submitting Author has the right to grant and does grant on behalf of all authors of the Work (as defined in the below author licence), an exclusive licence and/or a non-exclusive licence for contributions from authors who are: i) UK Crown employees; ii) where BMJ has agreed a CC-BY licence shall apply, and/or iii) in accordance with the terms applicable for US Federal Government officers or employees acting as part of their official duties; on a worldwide, perpetual, irrevocable, royalty-free basis to BMJ Publishing Group Ltd ("BMJ") its licensees and where the relevant Journal is co-owned by BMJ to the co-owners of the Journal, to publish the Work in this journal and any other BMJ products and to exploit all rights, as set out in our [licence](#).

The Submitting Author accepts and understands that any supply made under these terms is made by BMJ to the Submitting Author unless you are acting as an employee on behalf of your employer or a postgraduate student of an affiliated institution which is paying any applicable article publishing charge ("APC") for Open Access articles. Where the Submitting Author wishes to make the Work available on an Open Access basis (and intends to pay the relevant APC), the terms of reuse of such Open Access shall be governed by a Creative Commons licence – details of these licences and which [Creative Commons](#) licence will apply to this Work are set out in our licence referred to above.

Other than as permitted in any relevant BMJ Author's Self Archiving Policies, I confirm this Work has not been accepted for publication elsewhere, is not being considered for publication elsewhere and does not duplicate material already published. I confirm all authors consent to publication of this Work and authorise the granting of this licence.

1  
2  
3 **The mental health consequences of COVID-19: a nationally representative cross-sectional study of**  
4 **pandemic-related stressors and anxiety disorders in the United States.**  
5  
6

7 Salma M Abdalla<sup>1</sup>, Catherine K Ettman<sup>1,2</sup>, Gregory H Cohen<sup>1,3</sup>, Sandro Galea<sup>1</sup>  
8  
9

10 <sup>1</sup> Boston University School of Public Health, Boston, MA, USA

11 <sup>2</sup> Brown University School of Public Health, Providence, RI, USA

12 <sup>3</sup> Columbia Mailman School of Public Health, NYC, NY, USA  
13  
14  
15

16 **Corresponding author**

17 Salma M Abdalla

18 Department of Epidemiology

19 Boston University School of Public Health,

20 Boston, Massachusetts, 02119, USA

21 **Telephone:** +16173583407

22 **Email:** [abdallas@bu.edu](mailto:abdallas@bu.edu)  
23  
24  
25  
26

27 **Word Count:** 2056

28 **Keywords:** COVID-19, mental health, anxiety, generalized anxiety disorder, post-traumatic stress  
29 symptoms, economic stressors  
30  
31  
32  
33  
34  
35  
36  
37  
38  
39  
40  
41  
42  
43  
44  
45  
46  
47  
48  
49  
50  
51  
52  
53  
54  
55  
56  
57  
58  
59  
60

## **Abstract**

**Objective:** to quantify the prevalence of anxiety disorders in the United States during the COVID-19 pandemic.

**Design:** cross-sectional analysis

**Setting:** a nationally representative sample in the United States between March 31 and April 12, 2020

**Participants:** 1450 English-speaking adult participants in the AmeriSpeak Panel. AmeriSpeak is a probability-based panel designed to be representative of households in the United States.

**Main outcome measures:** prevalence of probable generalized anxiety disorder (GAD) using the GAD-7 tool and probable post-traumatic stress symptoms (PTSS) using the 4-items PTSD checklist (PCL) tool. Both outcomes were adjusted for demographics and COVID-19 related stressors.

**Results:** the prevalence of GAD was 10.9% (95% CI: 9.1-13.2) and the prevalence of PTSS was 21.7% (95% CI: 19.1-24.6). Among participants reporting five or more COVID-19 related stressors, the prevalence of GAD was 20.5% (95% CI: 16.1-25.8) and the prevalence of PTSS was 35.7% (95% CI: 30.2-41.6). Reporting five or more COVID-19 related stressors was a predictor of both GAD (OR=4.5, 95% CI: 2.3-8.8) and PTSS (OR=3.3, 95% CI: 2.1-5.2).

## **Conclusions**

The prevalence of anxiety disorders in the United States, as the COVID-19 pandemic and policies implemented to tackle it unfolded, is higher than estimates reported prior to the pandemic and estimates reported following other mass traumatic events. Exposure to COVID-19 related stressors is associated with higher prevalence of both GAD and PTSS, highlighting the role these stressors play in increasing the burden of anxiety disorders in the United States. Mitigation policies need to take into account the effect of pandemic-related stressors on the mental health of the United States population.

### **Strengths and limitations of this study**

- This analysis uses a nationally representative sample examining the burden of anxiety disorders in the United States
- The study was conducted within a short duration following the implementation of state-wide policies to tackle the COVID-19 pandemic and includes questions about a wide-range of COVID-19 related stressors
- To assess the burden of anxiety disorders, the study uses screening, rather than diagnostic tools. However, these are validated tools
- The use of a pre-selected panel of participants can lead to selection bias

## **Introduction**

The effect of the COVID-19 pandemic on the American public has been profound. By May 10<sup>th</sup>, more than 80,000 people have died from COVID-19 in the United States, and a number of unprecedented physical distancing policies, such as statewide shelter-in-place orders, continue to be implemented to halt the spread of the pandemic. These policies changed daily life for most people in the United States significantly and continue to have large scale social and economic consequences. The physical toll of COVID-19, coupled with the ubiquity and severity of these policies, distinguish the pandemic as a mass traumatic event, one that is associated with extensive loss of lives and financial strains that can lead to severe and lasting psychological effects, anxiety disorders in particular.<sup>1-4</sup>

Uncertainty, fear, economic and social costs, and disruptions to daily life all contribute to a high prevalence of anxiety disorders following mass traumatic events.<sup>5,6</sup> For example, a study assessing the mental health consequences of the Ebola epidemic in Sierra Leone found that, a year following the epidemic, 6% of participants reached the threshold for a combined anxiety-depression measure and 27% reached the threshold for post-traumatic stress disorder (PTSD).<sup>7</sup> Another study estimated that, following Hurricane Katrina, the 30-day prevalence of PTSD was 30.3% among residents of the New Orleans metropolitan area, which was severely affected by the hurricane.<sup>8</sup> This previous work suggests that the COVID-19 pandemic will have a substantial effect on the prevalence of anxiety disorders in the United States. Early evidence from both China and the United States has found that COVID-19 pandemic is associated with adverse mental health consequences.<sup>9-11</sup> However, to our knowledge, the effects of COVID-19 and related stressors—both due to the pandemic and policies implemented to halt its spread—on the burden of anxiety disorders in the United States is yet to be documented.

We assessed the prevalence of anxiety disorders, generalized anxiety disorder (GAD) and post-traumatic stress symptoms (PTSS), as the COVID-19 pandemic unfolded in the United States. We also assessed the effects of COVID-19 related stressors on the burden of anxiety disorders following the implementation of wide-spread physical distancing policies in the United States.

## **Methods**

### **Data collection and sample**

This analysis is based on data from our COVID-19 and Life stressors Impact on Mental Health and Well-being Study (CLIMB). We collected nationally representative data using a random sample of adult participants in the AmeriSpeak Panel between March 31 and April 12, 2020. AmeriSpeak is a probability-based panel designed to be representative of households in the United States. The panel is funded and operated by the National Opinion Research Center (NORC) at the University of Chicago and their sampling frame covers approximately 97% of households in the country. The survey was offered to English-speaking participants who had completed an AmeriSpeak survey in the last 6 months.

In total, 1470 participants completed the survey, 1385 online and 85 via the phone, representing 64.3% of invited panelists. From those 1470 participants, 20 had missing data on either GAD or PTSS questions, which were removed; the final analysis included 1450 participants from the CLIMB study. The institutional review boards of NORC and Boston University Medical Campus (H-39986) approved the study. NORC obtained written consent from study participants when they first enrolled in the AmeriSpeak Panel.

### **Exposure variables**

Our structured survey included questions on demographic characteristics and whether the respondent had or knew anyone who had COVID-19. The primary exposure of interest was reporting COVID-19 related stressors. The stressor list included financial stressors, e.g. “losing a job” or “having problems paying rent,” and social and emotional stressors, e.g. “feeling alone” or “having relationship problems.” We excluded stressors that were applicable to only a subset of the population, ultimately including 14 stressors in our analysis. We then created a cumulative stressor score and divided the score into three stressor categories, low (0-2 stressors), medium (3-4 stressors), and high (5-14 stressors).

### **Outcome variables**

For psychological assessment, we used two validated anxiety disorders questionnaires. We used the GAD-7 to assess GAD.<sup>12</sup> The cutoff for probable GAD in our analysis was 15 score or more. We also



1  
2  
3 conducted a sensitivity analysis with a cutoff of 10 score or more. We used the 4-items PTSD checklist  
4 (PCL) to screen for PTSS. The cutoff for PTSS was three score or more.<sup>13</sup>  
5  
6

### 7 **Statistical analysis**

8  
9 We used STATA 16.1 to conduct the analysis for this study. We first calculated the overall prevalence of  
10 GAD and PTSS and the prevalence of each stratified by number of stressors. We conducted a bivariable  
11 analysis comparing GAD and PTSS prevalence across demographic characteristics, stressor score, and  
12 each type of stressor using a two-tailed chi-square test. We then constructed multiple logistic regression  
13 models to assess the predictors of each outcome. All analyses were weighted using complex survey  
14 weights to adjust for sample selection and post-stratification. We followed the Strengthening  
15 the Reporting of Observational Studies in Epidemiology (STROBE)  
16 reporting guideline for cross-sectional studies when designing and  
17 reporting on this analysis.  
18  
19  
20  
21  
22  
23  
24  
25  
26  
27

### 28 **Patient and public involvement**

29 Patients and the public were not involved in the developing the research question, design, or  
30 implementation of this analysis. This primarily because we did not have funding to support such  
31 involvement and our analysis was on a national level using validated assessment tools.  
32  
33  
34  
35  
36

### 37 **Results**

38  
39 Of the 1450 participants, 10.9% (95% CI: 9.1, 13.2) reached the threshold for probable GAD, using a  
40 score of 15 as a cutoff. When using 10 score as a cutoff point, 25% (95% CI: 22.2-28.0) reached the  
41 threshold for probable GAD. 21.7% (95% CI: 19.1-24.6) reported PTSS.  
42  
43  
44

45 Table 1 shows the association between demographic characteristics and the two outcomes. In particular,  
46 female sex was associated with a higher prevalence of both GAD and PTSS in the bivariable analysis.  
47  
48

49 The prevalence of GAD was 14.1% (95% CI: 11.2-17.6) among females compared to 7.6% (95% CI: 5.4-  
50 10.4) among males. The prevalence of PTSS was 26.1% (95% CI: 22.3-30.2) among females compared to  
51 17% (95% CI: 13.5-21.2) among males. Other demographic variables associated with both outcomes were  
52  
53  
54  
55  
56  
57  
58  
59  
60

1  
2  
3 age and household savings. In the multivariable analysis, age and household savings were predictors of  
4 GAD while gender and old age were predictors of PTSS.

### 7 **COVID-19 related stressors and anxiety disorders**

9 Higher stressor score was associated with, and a predictor of, both GAD and PTSS. The prevalence of  
10 GAD was 4% (95% CI: 2.2-7.0) among participants with low stressor score, 8.6% (95% CI: 6.2-11.8)  
11 among participants with medium stressor score, and 20.5% (95% CI: 16.1-25.8) among participants with  
12 high stressor score. High stressor score was a predictor of GAD (OR=4.5, 95% CI: 2.3-8.8) compared to  
13 reporting a low stressor score.

14 The prevalence of PTSS was 12.4% (95% CI: 8.9-17.0) among participants with low stressor score,  
15 17.4% (95% CI: 13.6-22.0) among participants with medium stressor score, and 35.7% (95% CI: 30.2-  
16 41.6) among participants with high stressor score. Reporting a high stressor score, compared to a low  
17 stressor score, was a predictor of PTSS (OR=3.3, 95% CI: 2.1-5.2) (Table 1).

18 Figure 1 shows that reporting any COVID-19 related stressor, except for experiencing travel restrictions,  
19 was associated with higher GAD prevalence. The greatest difference in GAD prevalence by COVID-19  
20 stressor was between participants who reported having family or relationship problems (prevalence=27%,  
21 95% CI: 19.6-36.1) compared to participants who did not report family or relationship problems  
22 (prevalence=8.7%, 95% CI: 6.9-10.9). Other stressors leading to a significant difference in GAD  
23 prevalence included feeling lonely, having difficulty paying the rent, losing a job, having financial  
24 problems, and a household member losing a job. Figure 2 shows that participants who reached the  
25 threshold for probable GAD reported, on average, experiencing a higher number of stressors compared to  
26 participants who did not reach the threshold for probable GAD.

27 Figure 3 shows that reporting any COVID-19 related stressor was associated with higher PTSS  
28 prevalence. The greatest significant difference in PTSS prevalence was between participants who reported  
29 having financial problems (prevalence=37.2%, 95% CI: 31.1-43.7) compared to participants who did not  
30 report having financial problems (prevalence=15.8%, 95% CI: 13.2-18.8). Other stressors leading to a  
31 significant difference in PTSS prevalence included feeling alone, losing a job, and having difficulty  
32  
33  
34  
35  
36  
37  
38  
39  
40  
41  
42  
43  
44  
45  
46  
47  
48  
49  
50  
51  
52  
53  
54  
55  
56  
57  
58  
59  
60

1  
2  
3 paying the rent, among others. Figure 4 shows that participants who reached the threshold for PTSS  
4 reported, on average, experienced a higher number of stressors compared to participants who did not  
5 reach the threshold for PTSS.  
6  
7  
8

### 9 **Discussion**

10  
11 In a survey of a representative sample of adults in the United States conducted between March 31 and  
12 April 12, 10.9% reported a score indicative of probable GAD and 21% reported PTSS. These numbers are  
13 significantly higher than the expected prevalence of anxiety disorders in the United States. The National  
14 Comorbidity Survey replication estimated that the prevalence of GAD and PTSD in the United States  
15 were 3.1% and 3.5%, respectively.<sup>14</sup> Another analysis showed that the 12-month prevalence of GAD in  
16 United States in 2017 was 4%.<sup>15</sup>  
17  
18  
19

20 COVID-19 related stressors were associated with participants reporting more symptoms of GAD or  
21 PTSS. The prevalence of GAD was four times higher among participants reporting five or more stressors  
22 compared to participants reporting two or fewer stressors. The prevalence of PTSS was about three times  
23 higher among participants reporting five or more stressors compared to participants reporting two or  
24 fewer COVID-19 related stressors. This reinforces the hypothesis that COVID-19 behaves like a mass  
25 traumatic event, wherein experiences related to COVID-19 and its consequences are directly linked to  
26 adverse mental health consequences.  
27  
28  
29

30 Our study is consistent with existing literature showing higher prevalence of anxiety disorders following  
31 mass traumatic events, even if our results suggest the severity anxiety disorders due to the COVID-19  
32 pandemic is greater than that previously recorded after other mass traumas.<sup>1</sup> Agyapong et al. reported that  
33 the prevalence of GAD after one month following a wildfire—which physically, emotionally, and  
34 economically affected the community—was 19.8%.<sup>16</sup> Their results were based on using a score of 10  
35 points on the GAD-7 scale as the cutoff. Using the same cutoff, the prevalence of GAD in our analysis  
36 rises to 25%. Silver et al. found that 17% of the United States population that lives outside New York city  
37 reported PTSS two months after the September 11 terrorist attack.<sup>17</sup>  
38  
39  
40  
41  
42  
43  
44  
45  
46  
47  
48  
49  
50  
51  
52  
53  
54  
55  
56  
57  
58  
59  
60

1  
2  
3 Our study complements emerging studies from China showing that COVID-19 has led to adverse  
4 psychological consequences.<sup>10,11</sup> We add to the literature by quantifying the probable prevalence of GAD  
5 and PTSS as the COVID-19 pandemic unfolded in the United States. Our results also support analysis  
6 from Nelson et al. showing the widespread concerns and stressors due to COVID-19 in the United States.<sup>9</sup>  
7  
8 Our work both describes the experience of particular stressors and quantifies their contribution to the  
9 burden of anxiety disorders in the country. In particular, we show that economic (e.g. having difficulty  
10 paying the rent) and emotional (e.g. feeling lonely) stressors contribute to higher rates of both GAD and  
11 PTSS, which aligns with existing literature.<sup>6</sup>

12  
13 These results should be considered with the following limitations in mind. First, our study uses screeners  
14 for GAD and PTSS. A definitive diagnosis of either will require clinical assessment. However, both  
15 screening questionnaires in our analysis are validated tools used to approximate the prevalence of GAD  
16 and PTSS in the population.<sup>12,13</sup> Second, the use of a pre-specified panel can lead to selection bias.  
17  
18 However, AmeriSpeak panel has been used reliably for years to provide representative samples of the  
19 United States.<sup>18</sup> Third, our post-only design suggests that we cannot directly link the epidemic, and the  
20 policies implemented to tackle it, to a subsequent increased burden of anxiety disorders. However, the  
21 specificity of stressors reported, and the high burden of reported anxiety disorders, consistent with  
22 previous knowledge and expectation, strongly suggest that we are observing reliable effects that can be  
23 further examined in subsequent longitudinal work.

## 41 **Conclusion**

42  
43 The burden of anxiety disorders as the COVID-19 pandemic unfolded in the United States appears  
44 substantially higher than expected baseline prevalence and of the burden reported following other mass  
45 traumatic events. This potentially reflects the scale of the epidemic, the ubiquity of policies implemented  
46 to tackle it, and the economic and social consequences of both. Persons experiencing COVID-19 related  
47 stressors, particularly economic and emotional stressors, were more likely to report both GAD and PTSS  
48 indicating the driving role these stressors are playing in increasing the burden of anxiety disorders in the  
49  
50  
51  
52  
53  
54  
55  
56  
57  
58  
59

1  
2  
3  
4  
5  
6  
7  
8  
9  
10  
11  
12  
13  
14  
15  
16  
17  
18  
19  
20  
21  
22  
23  
24  
25  
26  
27  
28  
29  
30  
31  
32  
33  
34  
35  
36  
37  
38  
39  
40  
41  
42  
43  
44  
45  
46  
47  
48  
49  
50  
51  
52  
53  
54  
55  
56  
57  
58  
59  
60

United States. COVID-19 mitigation policies need to take into account the effect of pandemic-related stressors on the mental health of the United States population.

For peer review only

1  
2  
3 **Contributors:** CKE and SMA developed the first draft of the survey. SG reviewed the survey. SMA  
4 conducted the data analysis and wrote the manuscript draft. CKE, GHC, and SG contributed to study  
5 conception and manuscript drafting. All authors acknowledge full responsibility for the analyses and  
6 interpretation of the report. The corresponding author attests that all listed authors meet authorship criteria  
7 and that no others meeting the criteria have been omitted.  
8  
9

10  
11  
12  
13 **Funding:** The research was funded by the Rockefeller Foundation-Boston University 3-D Commission  
14 (grant number 2019 HTH 024). The Rockefeller Foundation had no role in the design and conduct of the  
15 study; collection, management, analysis, and interpretation of the data; preparation, review, or approval of  
16 the manuscript; or the decision to submit the manuscript for publication.  
17  
18

19  
20  
21  
22 **Competing interests:** All authors have completed the ICMJE uniform disclosure form at  
23 [http://www.icmje.org/coi\\_disclosure.pdf](http://www.icmje.org/coi_disclosure.pdf) and declare: support from the Rockefeller Foundation-Boston  
24 University 3-D Commission; no financial relationships with any organisation that might have an interest  
25 in the submitted work in the previous three years; no other relationships or activities that could appear to  
26 have influenced the submitted work.  
27  
28

29  
30  
31  
32 **Data sharing:** authors may share the data upon reasonable requests  
33

34  
35 **Transparency statement:** The lead authors affirm that the manuscript is an honest, accurate, and  
36 transparent account of the study being reported; that no important aspects of the study have been omitted;  
37 and that any discrepancies from the study as planned (and, if relevant, registered) have been explained.  
38  
39

40  
41 **Dissemination to participants and related patient and public communities:** There are no immediate  
42 plans to directly disseminate the analysis results to directly to the participants o as this study analyzed  
43 deidentified data. However, we aim to widely disseminate the results through our institution website and  
44 social media outlets to reach the public.  
45  
46  
47  
48  
49  
50  
51  
52  
53  
54  
55  
56  
57  
58  
59  
60

## References

1. Goldmann E, Galea S. Mental Health Consequences of Disasters. *Annu Rev Public Health*. 2014;35(1):169-183. doi:10.1146/annurev-publhealth-032013-182435
2. Ni MY, Kim Y, McDowell I, et al. Mental health during and after protests, riots and revolutions: A systematic review. *Aust N Z J Psychiatry*. 2020;54(3):232-243. doi:10.1177/0004867419899165
3. Peng EYC, Lee MB, Tsai ST, et al. Population-based post-crisis psychological distress: An example from the SARS outbreak in Taiwan. *J Formos Med Assoc*. 2010;109(7):524-532. doi:10.1016/S0929-6646(10)60087-3
4. David D, Mellman TA, Mendoza LM, Kulick-Bell R, Ironson G, Schneiderman N. Psychiatric morbidity following Hurricane Andrew. *J Trauma Stress*. 1996;9(3):607-612. doi:10.1007/BF02103669
5. Jeong H, Yim HW, Song YJ, et al. Mental health status of people isolated due to Middle East Respiratory Syndrome. *Epidemiol Health*. 2016;38:e2016048. doi:10.4178/epih.e2016048
6. Viseu J, Leal R, de Jesus SN, Pinto P, Pechorro P, Greenglass E. Relationship between economic stress factors and stress, anxiety, and depression: Moderating role of social support. *Psychiatry Res*. 2018;268:102-107. doi:10.1016/j.psychres.2018.07.008
7. Jalloh MF, Li W, Bunnell RE, et al. Impact of Ebola experiences and risk perceptions on mental health in Sierra Leone, July 2015. *BMJ Glob Heal*. 2018;3(2):e000471. doi:10.1136/bmjgh-2017-000471
8. Galea S, Brewin CR, Gruber M, et al. Exposure to hurricane-related stressors and mental illness after Hurricane Katrina. *Arch Gen Psychiatry*. 2007;64(12):1427-1434. doi:10.1001/archpsyc.64.12.1427
9. Nelson LM, Simard JF, Oluyomi A, et al. US Public Concerns about the COVID-19 Pandemic from Results of a Survey Given via Social Media. *JAMA Intern Med*. 2020. doi:10.1001/jamainternmed.2020.1369
10. Cao W, Fang Z, Hou G, et al. The psychological impact of the COVID-19 epidemic on college

- 1  
2  
3 students in China. *Psychiatry Res.* 2020;287. doi:10.1016/j.psychres.2020.112934  
4
- 5 11. Lai J, Ma S, Wang Y, et al. Factors Associated With Mental Health Outcomes Among Health Care  
6 Workers Exposed to Coronavirus Disease 2019. *JAMA Netw open.* 2020;3(3):e203976.  
7  
8 doi:10.1001/jamanetworkopen.2020.3976  
9
- 10 12. Spitzer RL, Kroenke K, Williams JBW, Löwe B. A brief measure for assessing generalized  
11 anxiety disorder: The GAD-7. *Arch Intern Med.* 2006;166(10):1092-1097.  
12  
13 doi:10.1001/archinte.166.10.1092  
14
- 15 13. Bliese PD, Wright KM, Adler AB, Cabrera O, Castro CA, Hoge CW. Validating the Primary Care  
16 Posttraumatic Stress Disorder Screen and the Posttraumatic Stress Disorder Checklist With  
17 Soldiers Returning From Combat. *J Consult Clin Psychol.* 2008;76(2):272-281. doi:10.1037/0022-  
18 006X.76.2.272  
19
- 20 14. Kessler RC, Wai TC, Demler O, Walters EE. Prevalence, severity, and comorbidity of 12-month  
21 DSM-IV disorders in the National Comorbidity Survey Replication. *Arch Gen Psychiatry.*  
22 2005;62(6):617-627. doi:10.1001/archpsyc.62.6.617  
23
- 24 15. Ruscio AM, Hallion LS, Lim CCW, et al. Cross-sectional comparison of the epidemiology of  
25 DSM-5 generalized anxiety disorder across the globe. *JAMA Psychiatry.* 2017;74(5):465-475.  
26  
27 doi:10.1001/jamapsychiatry.2017.0056  
28
- 29 16. Agyapong VIO, Hrabok M, Juhas M, et al. Prevalence rates and predictors of generalized anxiety  
30 disorder symptoms in residents of fort mcmurray six months after a wildfire. *Front Psychiatry.*  
31 2018;9. doi:10.3389/fpsy.2018.00345  
32
- 33 17. Silver RC, Alison Holman E, McIntosh DN, Poulin M, Gil-Rivas V. Nationwide longitudinal  
34 study of psychological responses to September 11. *J Am Med Assoc.* 2002;288(10):1235-1244.  
35  
36 doi:10.1001/jama.288.10.1235  
37
- 38 18. AmeriSpeak: NORC's Breakthrough Panel-Based Research Platform | NORC.org.  
39  
40  
41  
42  
43  
44  
45  
46  
47  
48  
49  
50  
51  
52  
53  
54  
55  
56  
57  
58  
59  
60
- https://www.norc.org/Research/Capabilities/Pages/amerispeak.aspx. Accessed May 18, 2020.



**Table 1: Generalized anxiety disorder (GAD) and post-traumatic distress symptoms (PTSS) in adults 18 years and older in the U.S. by demographic characteristics and COVID-19 related stressors.**

|                                 | Generalized anxiety disorder |                  |         |                     |         | Post-traumatic stress symptoms |         |                     |         |
|---------------------------------|------------------------------|------------------|---------|---------------------|---------|--------------------------------|---------|---------------------|---------|
|                                 | N (%)                        | % (95% CI)       | P-value | Odds ratio (95% CI) | P-value | % (95% CI)                     | P-value | Odds ratio (95% CI) | P-value |
| <b>Overall</b>                  | 1450                         | 10.9 (9.1–13.2)  |         |                     |         | 21.7 (19.1–24.6)               |         |                     |         |
| <b>Sex</b>                      |                              |                  |         |                     |         |                                |         |                     |         |
| Male                            | 725 (48.2)                   | 7.6 (5.4–10.4)   | 0.0018  | ref                 |         | 17 (13.5–21.2)                 | 0.0017  | ref                 |         |
| Female                          | 725 (51.8)                   | 14.1 (11.2–17.6) |         | 1.57 (0.99–2.51)    | 0.055   | 26.1 (22.3–30.2)               |         | 1.5 (1.1–2.1)       | 0.024   |
| <b>Age</b>                      |                              |                  |         |                     |         |                                |         |                     |         |
| 18-39 y                         | 623 (38.1)                   | 16.6 (13.0–21.2) | <0.0001 | ref                 |         | 26.1 (21.1–31.3)               | <0.0001 | ref                 |         |
| 40-59 y                         | 461 (32.0)                   | 9.2 (6.6–12.6)   |         | 0.6 (0.3–1.0)       | 0.035   | 25.5 (20.9–30.7)               |         | 1.0 (0.7–1.6)       | 0.850   |
| ≥60 y                           | 366 (29.9)                   | 5.6 (3.4–9.1)    |         | 0.50 (0.2–1.1)      | 0.078   | 12.0 (8.5–16.6)                |         | 0.6 (0.3–1.0)       | 0.050   |
| <b>Race/Ethnicity</b>           |                              |                  |         |                     |         |                                |         |                     |         |
| Non-Hispanic White              | 939 (62.9)                   | 10.8 (8.6–13.5)  | 0.3468  | ref                 |         | 22.0 (18.9–25.4)               | 0.1914  | ref                 |         |
| Non-Hispanic Black              | 143 (11.9)                   | 11.9 (6.8–20.1)  |         | 0.81 (0.4–1.8)      | 0.603   | 18.9 (12.5–27.6)               |         | 0.7 (0.4–1.2)       | 0.157   |
| Hispanic                        | 258 (16.7)                   | 11.3 (6.8–18.3)  |         | 0.8 (0.4–1.3)       | 0.307   | 27.0 (19.5–36.2)               |         | 1.1 (0.7–1.8)       | 0.749   |
| Non-Hispanic Asian              | 36 (3.1)                     | 0.8 (0.1–5.5)    |         | 0.1 (0.0–0.7)       | 0.023   | 8.7 (2.4–26.8)                 |         | 0.3 (0.1–1.5)       | 0.142   |
| Other                           | 74 (5.4)                     | 15.1 (7.4–28.6)  |         | 1.1 (0.4–2.7)       | 0.919   | 15.8 (7.7–29.5)                |         | 0.6 (0.3–1.2)       | 0.131   |
| <b>Education</b>                |                              |                  |         |                     |         |                                |         |                     |         |
| No high school diploma          | 67 (9.9)                     | 13.4 (6.2–26.5)  | 0.0230  | 1.3 (0.5–3.2)       | 0.643   | 19.7 (10.9–32.8)               | 0.3825  | 0.7 (0.4–1.5)       | 0.393   |
| High school grad or GED         | 276 (27.9)                   | 10.4 (6.8–15.4)  |         | 1.19 (0.6–2.4)      | 0.615   | 25.3 (19.5–32.2)               |         | 1.2 (0.7–1.9)       | 0.560   |
| Some college                    | 638 (27.6)                   | 15.8 (12.4–20.0) |         | 2.0 (1.2–3.4)       | 0.013   | 22.2 (18.48–26.49)             |         | 1.0 (0.7–1.5)       | 0.933   |
| College grad or more            | 469 (34.6)                   | 6.8 (4.7–9.7)    |         | ref                 |         | 18.9 (15.16–23.33)             |         | ref                 |         |
| <b>Marital status</b>           |                              |                  |         |                     |         |                                |         |                     |         |
| Married                         | 716 (47.8)                   | 7.6 (5.6–10.3)   | 0.0016  | ref                 |         | 19.0 (15.8–22.8)               | 0.1686  | ref                 |         |
| Widowed, divorced, or separated | 254 (18.8)                   | 10.2 (6.8–15.1)  |         | 1.3 (0.7–2.6)       | 0.392   | 20.9 (15.3–27.9)               |         | 1.1 (0.7–1.9)       | 0.693   |
| Never married                   | 345 (24.1)                   | 14.3 (10.0–20.2) |         | 1.4 (0.8–2.6)       | 0.273   | 24.9 (19.0–31.9)               |         | 1.2 (0.7–1.8)       | 0.566   |
| Living with partner             | 135 (9.3)                    | 20.8 (12.7–32.0) |         | 1.5 (0.7–2.9)       | 0.286   | 28.6 (19.5–39.8)               |         | 0.97 (0.6–1.7)      | 0.925   |
| <b>Household income</b>         |                              |                  |         |                     |         |                                |         |                     |         |
| \$0 - \$19,999                  | 251 (20.3)                   | 16.9 (11.7–23.7) | 0.0311  | 0.9 (0.4–1.9)       | 0.746   | 28.6 (21.7–36.8)               | 0.1188  | 1.2 (0.6–2.2)       | 0.660   |
| \$20,000 - \$44,999             | 358 (25.7)                   | 12.0 (8.4–17.0)  |         | 0.6 (0.3–1.3)       | 0.219   | 19.5 (15.1–24.8)               |         | 0.7 (0.4–1.2)       | 0.158   |
| \$45,000 - \$74,999             | 356 (24.8)                   | 9.0 (6.0–13.2)   |         | 0.6 (0.3–1.2)       | 0.138   | 22.0 (17.0–28.1)               |         | 0.9 (0.6–1.5)       | 0.688   |
| ≥\$75,000                       | 452 (29.2)                   | 8.5 (5.7–12.6)   |         | ref                 |         | 19.7 (15.3–25.0)               |         | ref                 |         |
| <b>Household savings</b>        |                              |                  |         |                     |         |                                |         |                     |         |
| \$0 - \$4,999                   | 578 (42.9)                   | 17.2 (13.6–21.6) | <0.0001 | 1.9 (1.2–3.1)       | 0.010   | 27.6 (23.2–32.6)               | 0.0011  | 1.2 (0.8–1.9)       | 0.349   |

|                                     |               |                       |         |                    |         |                       |         |                    |         |
|-------------------------------------|---------------|-----------------------|---------|--------------------|---------|-----------------------|---------|--------------------|---------|
| ≥\$5,000                            | 827<br>(57.1) | 6.9<br>(5.0 – 9.3)    |         | ref                |         | 18.0<br>(14.8 – 21.8) |         | ref                |         |
| <b>COVID-related stressor score</b> |               |                       |         |                    |         |                       |         |                    |         |
| Low                                 | 460<br>(31.2) | 4.0<br>(2.2 – 7.0)    | <0.0001 | ref                |         | 12.4<br>(8.9 – 17.0)  | <0.0001 | ref                |         |
| Medium                              | 544<br>(37.0) | 8.6<br>(6.2 – 11.8)   |         | 2.0<br>(1.0 – 4.0) | 0.046   | 17.4<br>(13.6 – 22.0) |         | 1.4<br>(0.9 – 2.3) | 0.139   |
| High                                | 446<br>(31.8) | 20.5<br>(16.1 – 25.8) |         | 4.5<br>(2.3 – 8.8) | <0.0001 | 35.7<br>(30.2 – 41.6) |         | 3.3<br>(2.1 – 5.2) | <0.0001 |
| Household size (mean)               | 3.2           |                       |         | 1.0<br>(0.8– 1.1)  | 0.710   |                       |         | 1.0<br>(0.9 – 1.1) | 0.910   |

All percentages are weighted. Missing data: household income (n=33), household savings (n=45), and COVID-19 stressor score

(n=3). GED is the general education diploma. COVID-19 stressor score calculated from stressor summation ranging from 0-13; categories represent low (score of 0-2), medium (score of 3-4), and high (score of 5-14) exposure to stressors due to COVID-19. GAD defined by a GAD-7 score  $\geq 15$ . PTSS defined by a 4-item PTSD checklist (PCL) score  $\geq 3$ .

Two-tailed chi-square analysis conducted for significance testing.

**Figure 1: Prevalence of generalized anxiety disorder (GAD) for persons reporting different COVID-19 stressors**

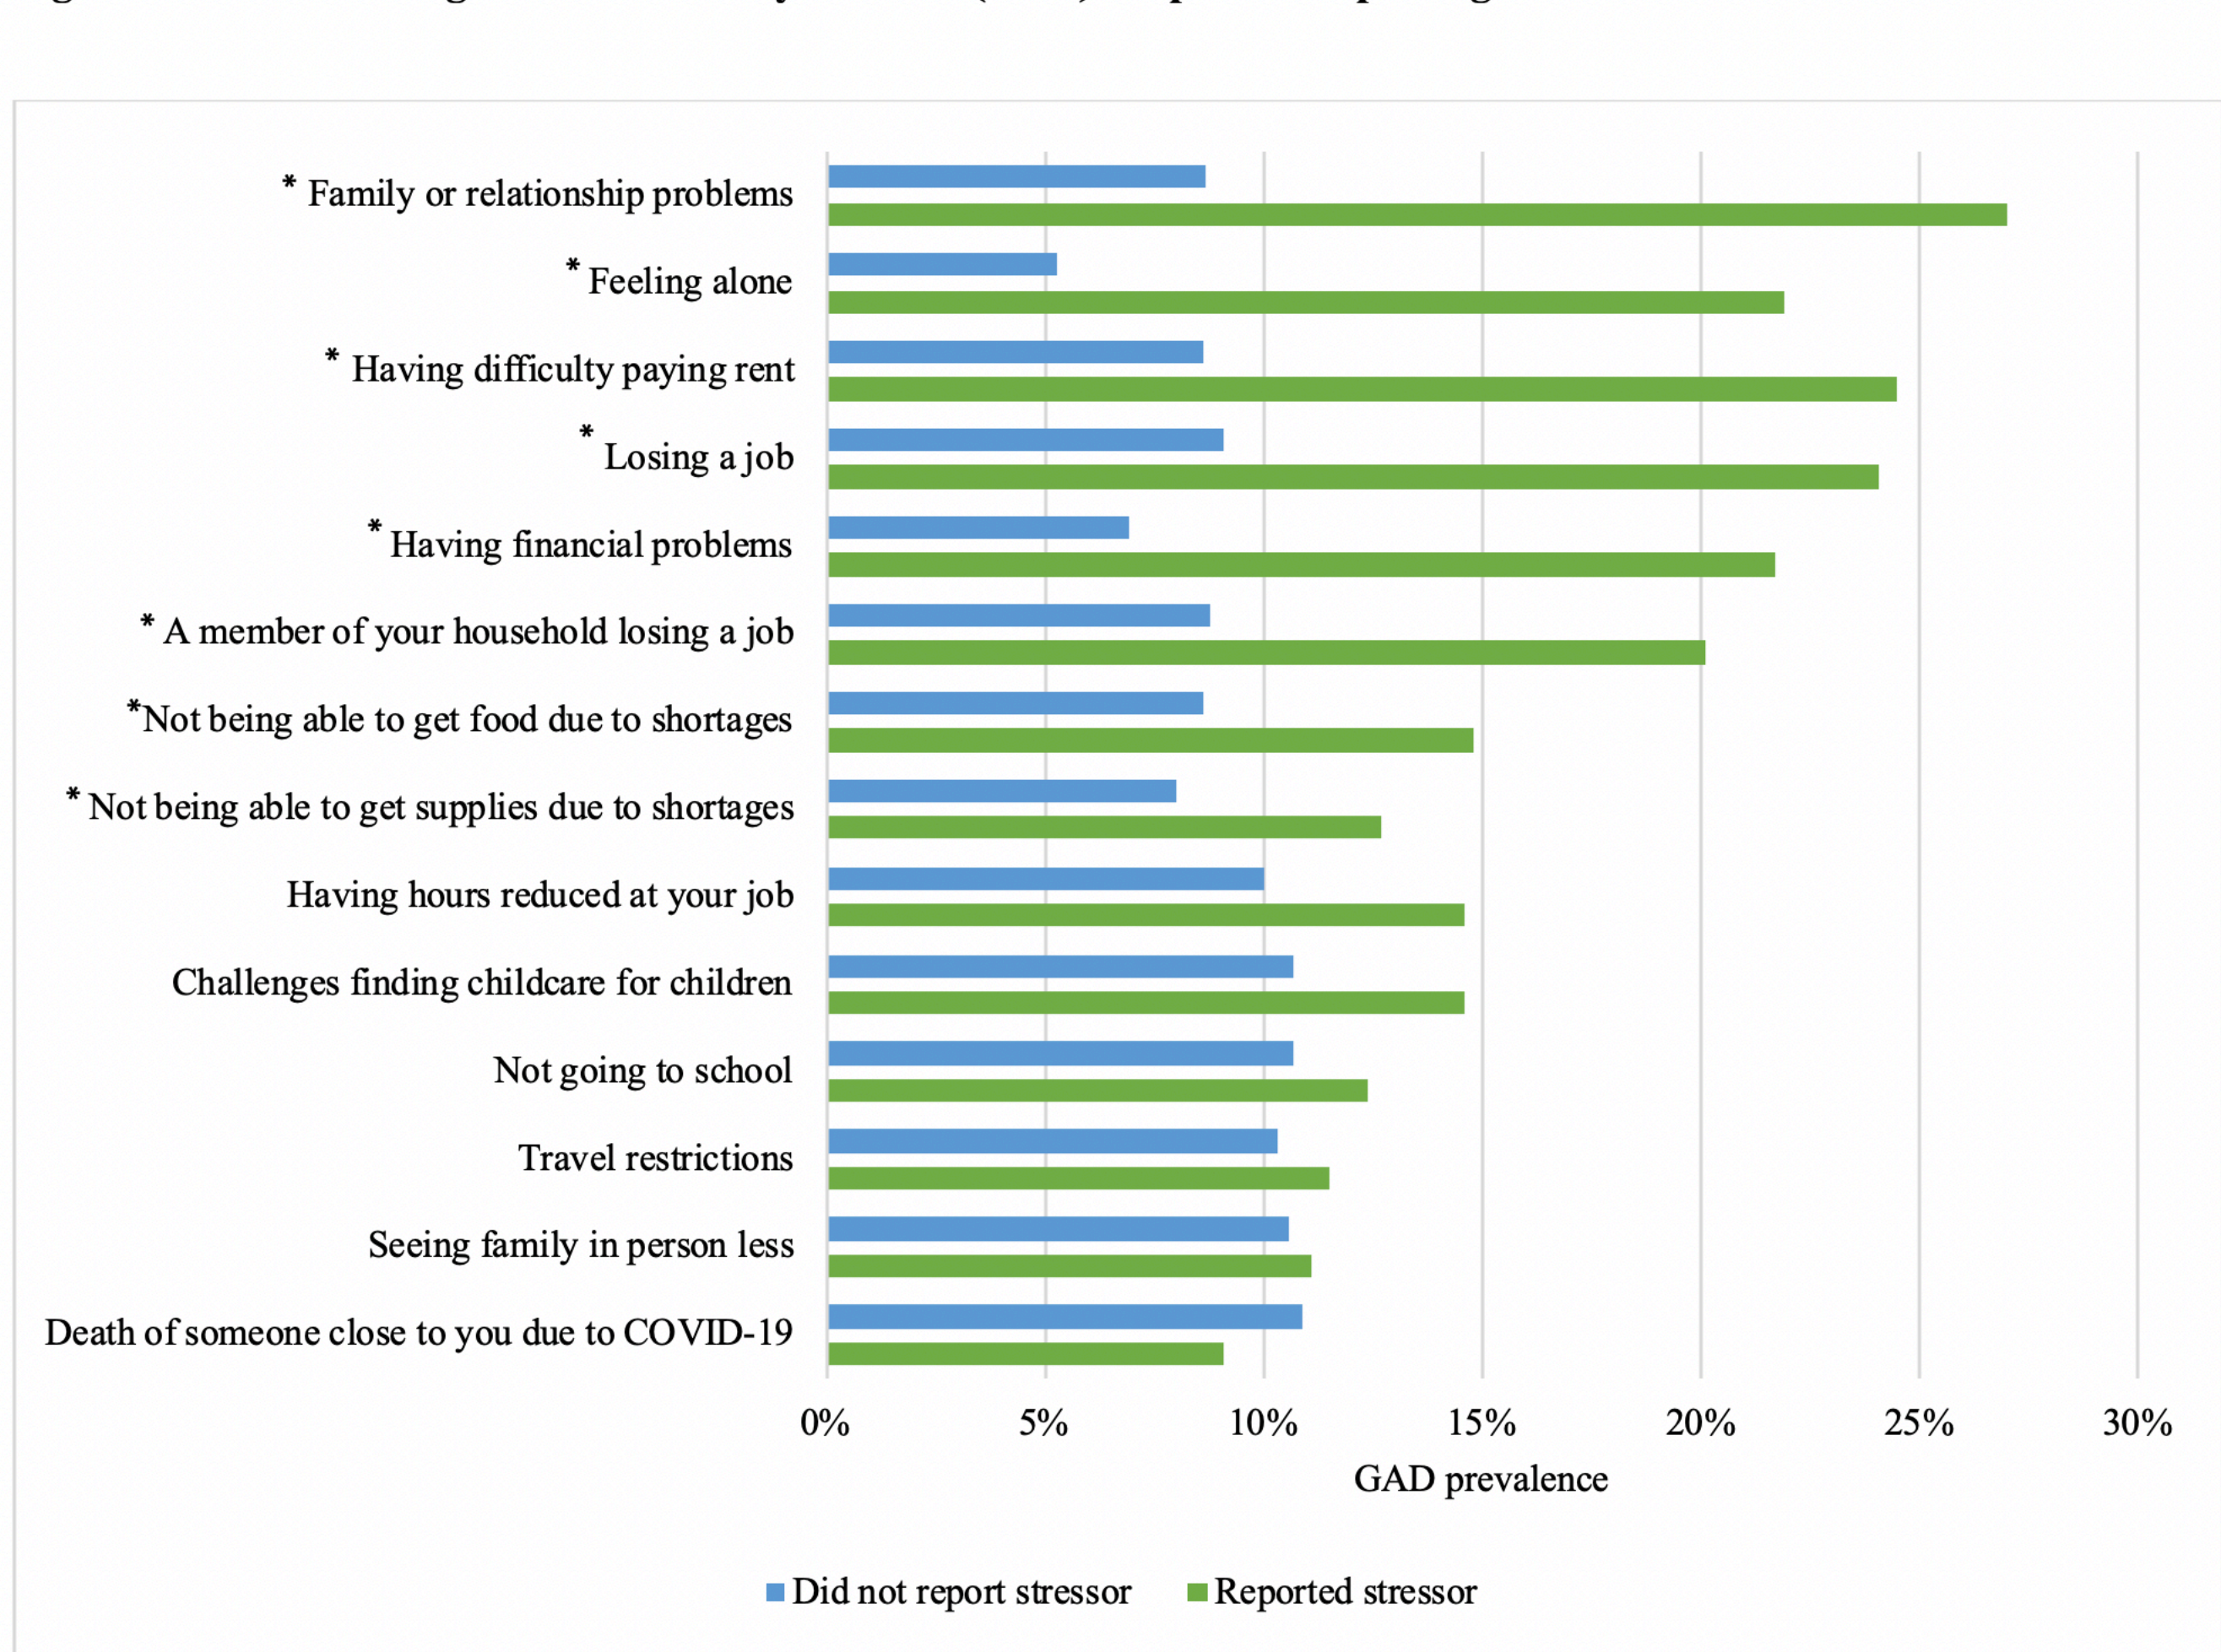

\*P<0.05  
 GAD defined by a GAD-7 score ≥15. Percentages are weighted to the U.S. population. This analysis is based on data from our COVID-19 and Life stressors Impact on Mental Health and Well-being Study (CLIMB).  
<https://www.bmj.com/site/about/guidelines.xhtml>

**Figure 2: Distribution of total number of COVID-19 stressors by generalized anxiety disorder (GAD) status**

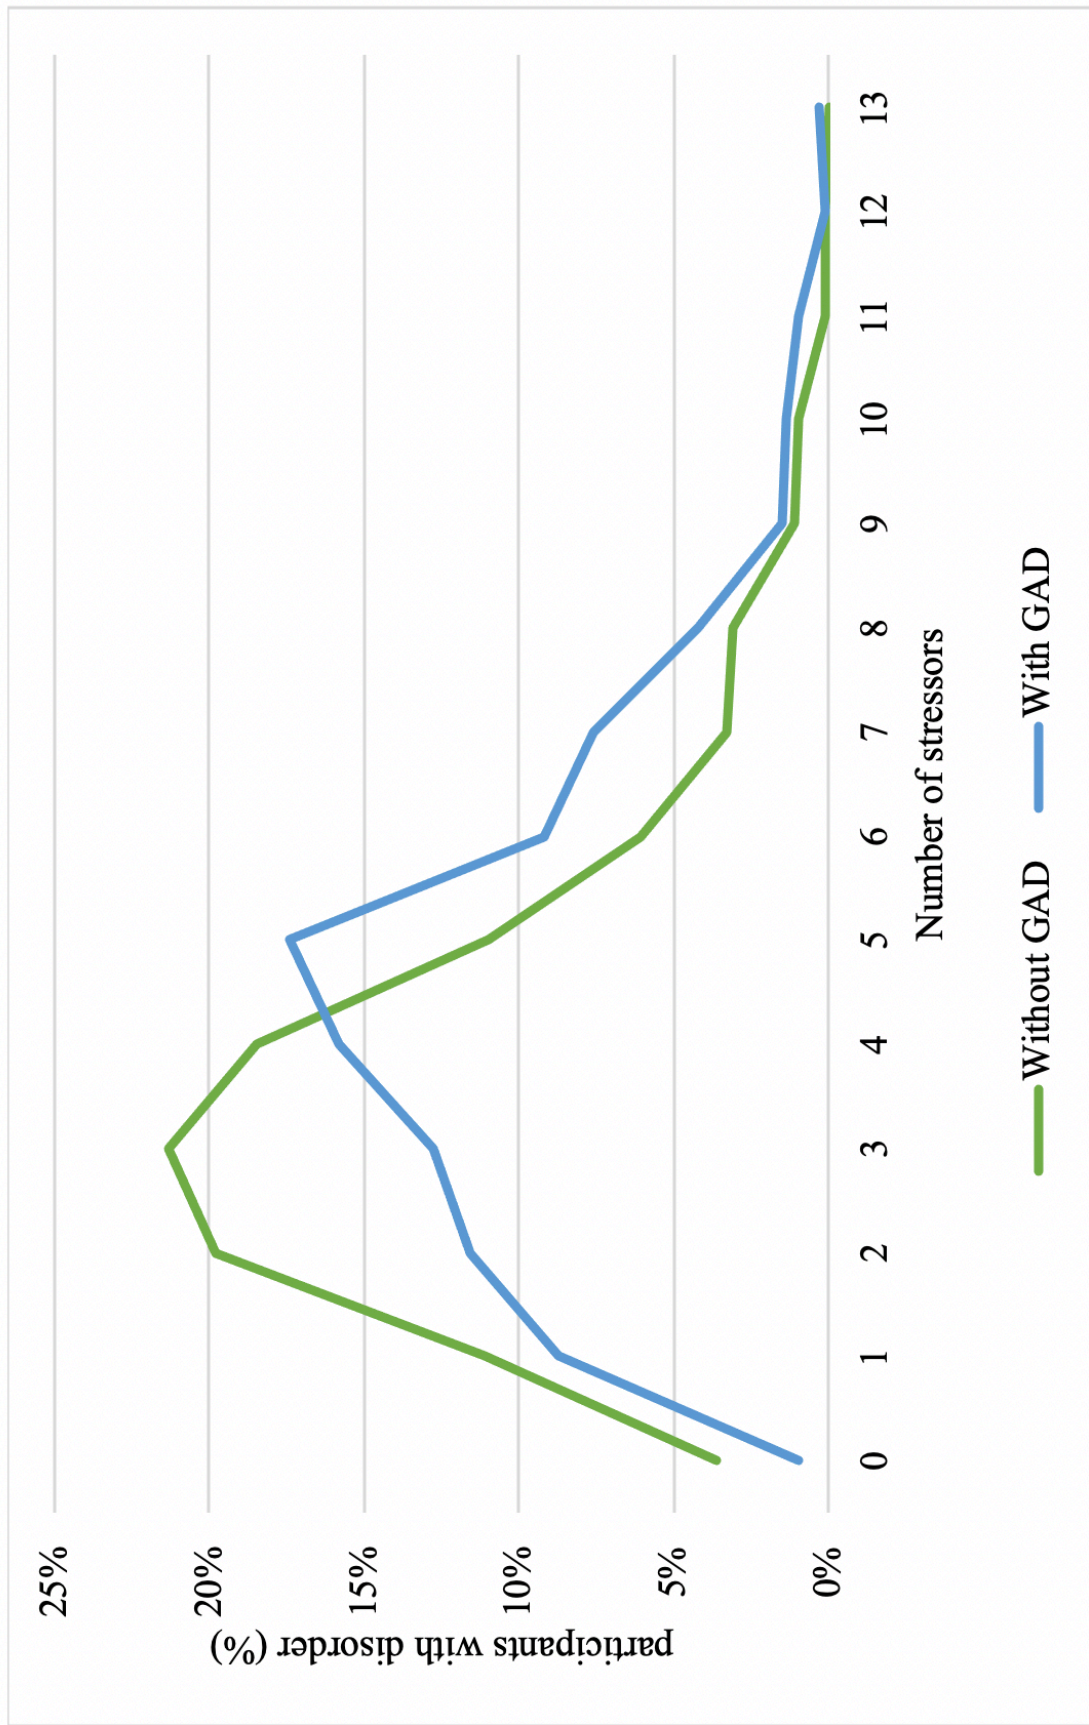

GAD defined by a GAD-7 score  $\geq 15$ . Percentages are weighted to the U.S. population. This analysis is based on data from our COVID-19 and Life stressors Impact on Mental Health and Well-being Study (CLIMB).

1  
2  
3  
4  
5  
6  
7  
8  
9  
10  
11  
12  
13  
14  
15  
16  
17  
18  
19  
20  
21  
22  
23  
24  
25  
26  
27  
28  
29  
30  
31  
32  
33  
34  
35  
36  
37  
38  
39  
40  
41  
42  
43  
44  
45  
46  
47  
48  
49  
50  
51  
52  
53  
54  
55  
56  
57  
58  
59  
60

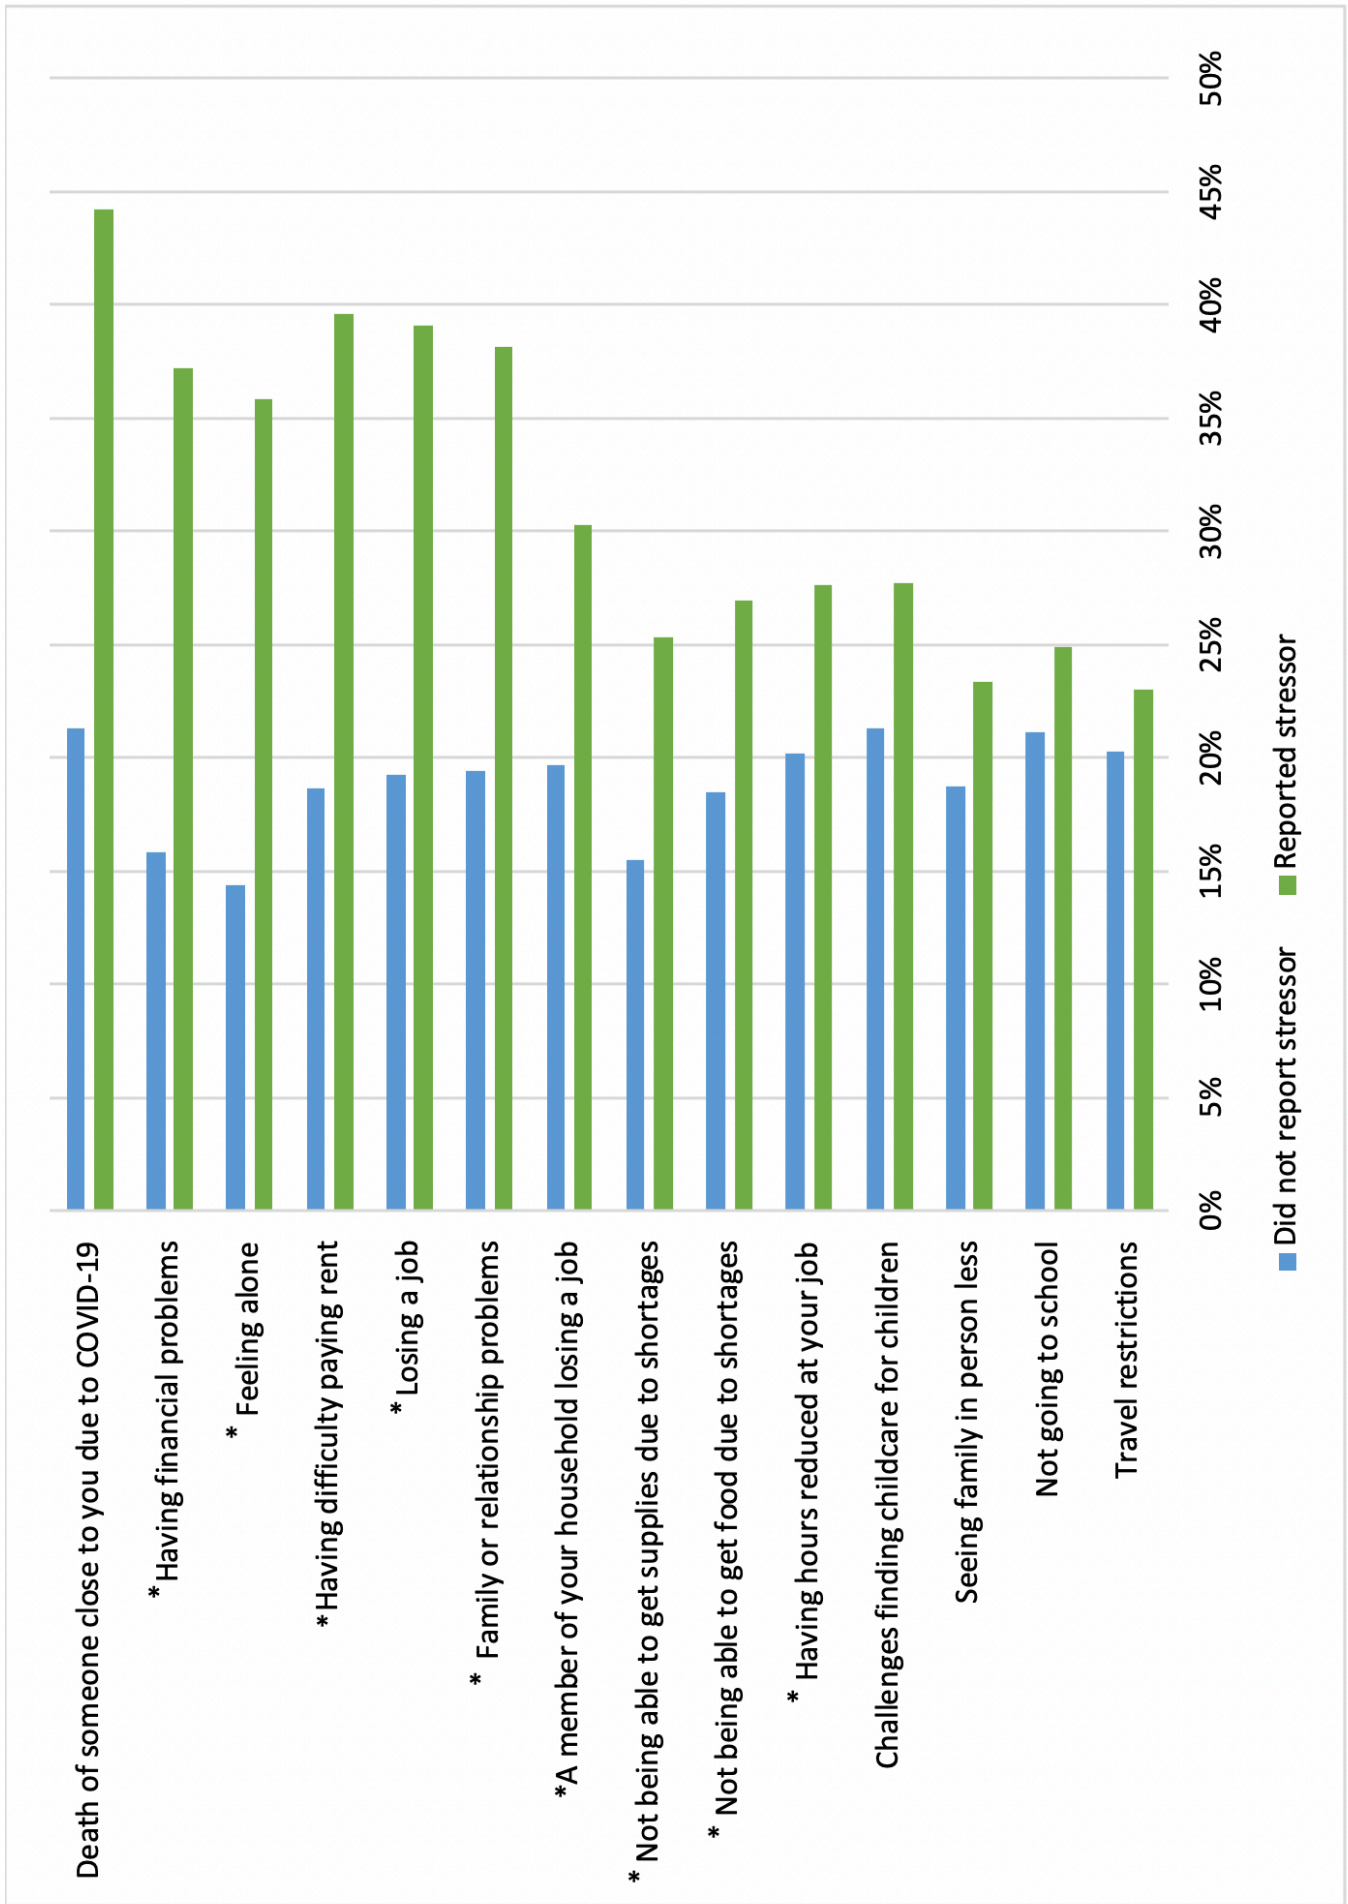

\*P<0.05  
PTSS defined by a 4-item PTSD checklist (PCL) score ≥3. Percentages are weighted to the U.S. population. This analysis is based on data from our COVID-19 and Life stressors Impact on Mental Health and Well-being Study (CLIMB).

**Figure 4: Distribution of total number of COVID-19 stressors by post-traumatic stress symptoms (PTSS) status**

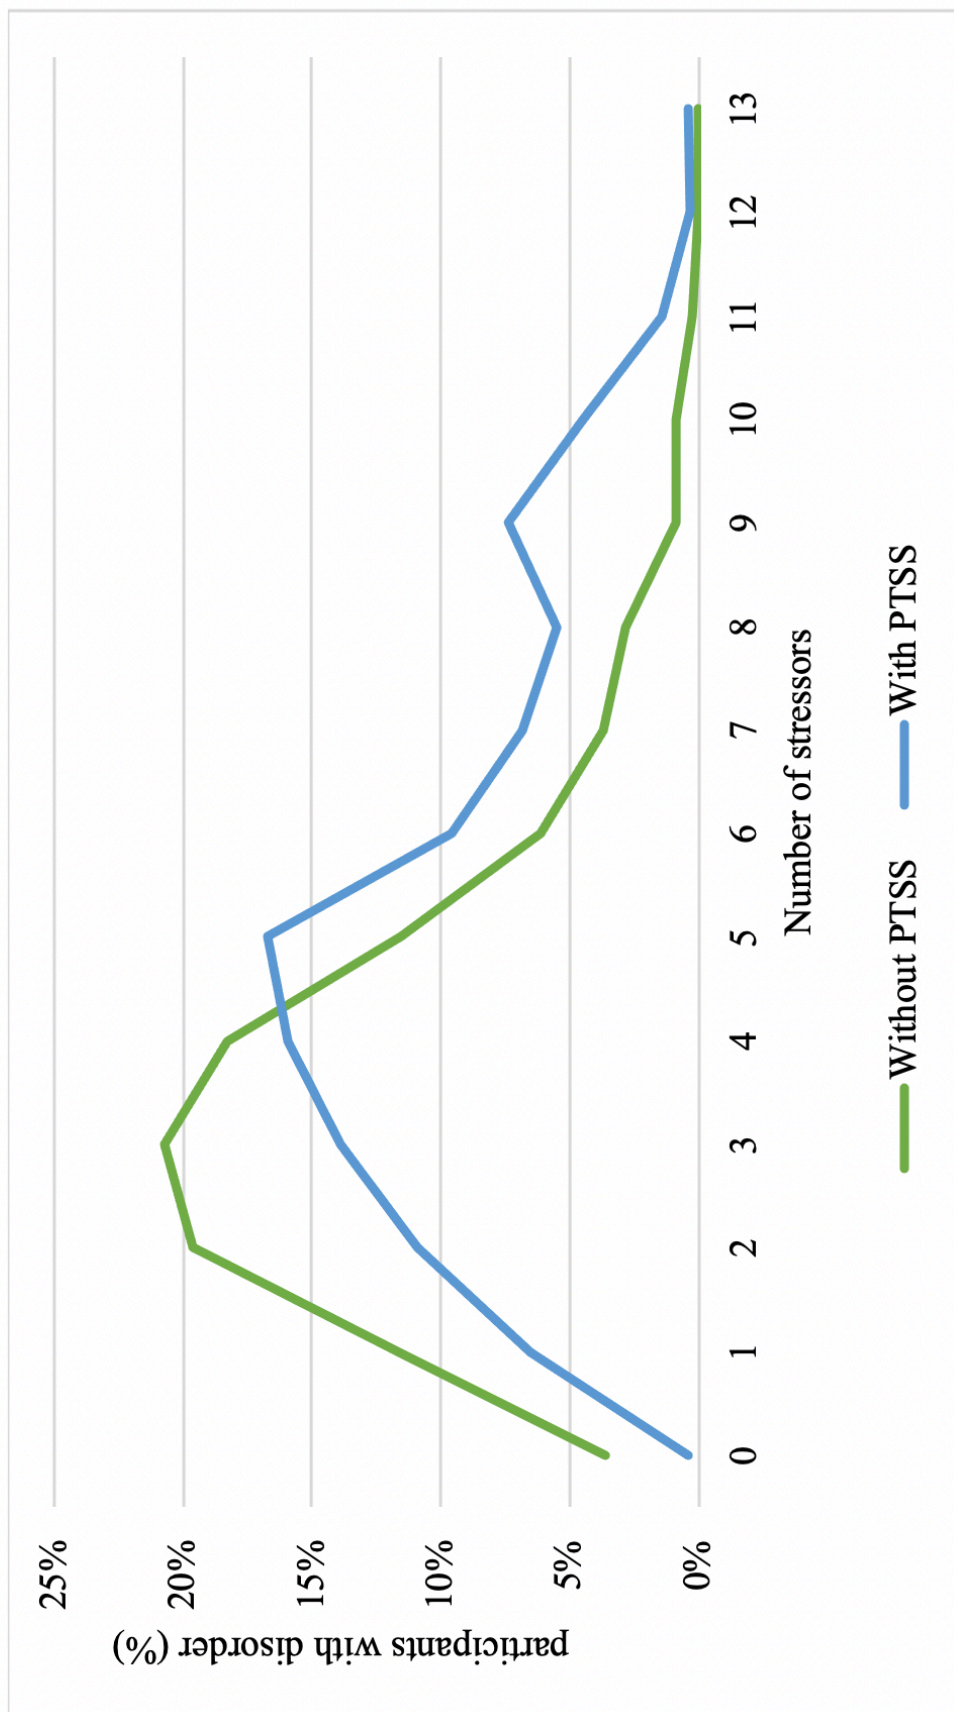

PTSS defined by a 4-item PTSD checklist (PCL) score  $\geq 3$ . Percentages are weighted to the U.S. population. This analysis is based on data from our COVID-19 and Life stressors Impact on Mental Health and Well-being Study (CLIMB).

# BMJ Open

## The mental health consequences of COVID-19: a nationally representative cross-sectional study of pandemic-related stressors and anxiety disorders in the United States.

|                                 |                                                                                                                                                                                                                                                                                                                             |
|---------------------------------|-----------------------------------------------------------------------------------------------------------------------------------------------------------------------------------------------------------------------------------------------------------------------------------------------------------------------------|
| Journal:                        | <i>BMJ Open</i>                                                                                                                                                                                                                                                                                                             |
| Manuscript ID                   | bmjopen-2020-044125.R1                                                                                                                                                                                                                                                                                                      |
| Article Type:                   | Original research                                                                                                                                                                                                                                                                                                           |
| Date Submitted by the Author:   | 09-Feb-2021                                                                                                                                                                                                                                                                                                                 |
| Complete List of Authors:       | Abdalla, Salma; Boston University School of Public Health, Epidemiology<br>Ettman, Catherine; Boston University School of Public Health; Brown<br>University School of Public Health<br>Cohen, Gregory; Boston University School of Public Health, Epidemiology<br>Galea, Sandro; Boston University School of Public Health |
| <b>Primary Subject Heading</b>: | Mental health                                                                                                                                                                                                                                                                                                               |
| Secondary Subject Heading:      | Public health, Epidemiology                                                                                                                                                                                                                                                                                                 |
| Keywords:                       | MENTAL HEALTH, COVID-19, Anxiety disorders < PSYCHIATRY                                                                                                                                                                                                                                                                     |
|                                 |                                                                                                                                                                                                                                                                                                                             |

SCHOLARONE™  
Manuscripts

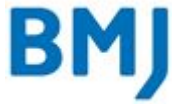

I, the Submitting Author has the right to grant and does grant on behalf of all authors of the Work (as defined in the below author licence), an exclusive licence and/or a non-exclusive licence for contributions from authors who are: i) UK Crown employees; ii) where BMJ has agreed a CC-BY licence shall apply, and/or iii) in accordance with the terms applicable for US Federal Government officers or employees acting as part of their official duties; on a worldwide, perpetual, irrevocable, royalty-free basis to BMJ Publishing Group Ltd ("BMJ") its licensees and where the relevant Journal is co-owned by BMJ to the co-owners of the Journal, to publish the Work in this journal and any other BMJ products and to exploit all rights, as set out in our [licence](#).

The Submitting Author accepts and understands that any supply made under these terms is made by BMJ to the Submitting Author unless you are acting as an employee on behalf of your employer or a postgraduate student of an affiliated institution which is paying any applicable article publishing charge ("APC") for Open Access articles. Where the Submitting Author wishes to make the Work available on an Open Access basis (and intends to pay the relevant APC), the terms of reuse of such Open Access shall be governed by a Creative Commons licence – details of these licences and which [Creative Commons](#) licence will apply to this Work are set out in our licence referred to above.

Other than as permitted in any relevant BMJ Author's Self Archiving Policies, I confirm this Work has not been accepted for publication elsewhere, is not being considered for publication elsewhere and does not duplicate material already published. I confirm all authors consent to publication of this Work and authorise the granting of this licence.



1  
2  
3 **The mental health consequences of COVID-19: a nationally representative cross-sectional study of**  
4  
5 **pandemic-related stressors and anxiety disorders in the United States.**  
6

7 Salma M Abdalla<sup>1</sup>, Catherine K Ettman<sup>1,2</sup>, Gregory H Cohen<sup>1,3</sup>, Sandro Galea<sup>1</sup>  
8

9 <sup>1</sup> Boston University School of Public Health, Boston, MA, USA

10 <sup>2</sup> Brown University School of Public Health, Providence, RI, USA

11 <sup>3</sup> Columbia Mailman School of Public Health, NYC, NY, USA  
12  
13  
14  
15

16 **Corresponding author**

17 Salma M Abdalla

18 Department of Epidemiology

19 Boston University School of Public Health

20 Boston, Massachusetts, 02119, USA

21 **Telephone:** +16173583407

22 **Email:** [abdallas@bu.edu](mailto:abdallas@bu.edu)  
23  
24  
25  
26

27 **Word Count:** 2056

28 **Keywords:** COVID-19, mental health, anxiety, generalized anxiety disorder, post-traumatic stress  
29 symptoms, economic stressors  
30  
31  
32  
33  
34  
35  
36  
37  
38  
39  
40  
41  
42  
43  
44  
45  
46  
47  
48  
49  
50  
51  
52  
53  
54  
55  
56  
57  
58  
59  
60

## **Abstract**

**Objective:** to quantify the prevalence of probable anxiety disorders in the United States during the COVID-19 pandemic.

**Design:** cross-sectional analysis

**Setting:** a nationally representative sample in the United States between March 31 and April 12, 2020

**Participants:** 1450 English-speaking adult participants in the AmeriSpeak Panel. AmeriSpeak is a probability-based panel designed to be representative of households in the United States.

**Main outcome measures:** prevalence of probable GAD using the GAD-7 tool and PTSS using the 4-items PTSD checklist (PCL) tool. Both outcomes were adjusted for demographics and COVID-19 related stressors.

**Results:** The majority of participants were female (51.8%), non-Hispanic white (62.9%), and have a household saving of \$5000 or more. Those between the ages 18-29 years were the largest age group (38.1%) compared to 40-59 years (32%) and 60 years or more (29.9%). The probable prevalence of GAD was 10.9% (95% CI: 9.1-13.2) and the prevalence of PTSS was 21.7% (95% CI: 19.1-24.6). Among participants reporting five or more COVID-19 related stressors, the probable prevalence of GAD was 20.5% (95% CI: 16.1-25.8) and the prevalence of PTSS was 35.7% (95% CI: 30.2-41.6). Reporting five or more COVID-19 related stressors was a predictor of both probable GAD (OR=4.5, 95% CI: 2.3-8.8) and PTSS (OR=3.3, 95% CI: 2.1-5.2).

**Conclusions:** The prevalence of probable anxiety disorders in the United States, as the COVID-19 pandemic and policies implemented to tackle it unfolded, is higher than estimates reported prior to the pandemic and estimates reported following other mass traumatic events. Exposure to COVID-19 related stressors is associated with higher prevalence of both probable GAD and PTSS, highlighting the role these stressors play in increasing the risk of developing of anxiety disorders in the United States. Mitigation policies need to take into account the effect of pandemic-related stressors on the mental health of the population.

### **Strengths and limitations of this study**

- This analysis uses a nationally representative sample examining the risk of developing of anxiety disorders in the United States
- The study was conducted within a short duration following the implementation of state-wide policies to tackle the COVID-19 pandemic and includes questions about a wide-range of social and economic COVID-19 related stressors
- To assess the risk of developing of anxiety disorders, the study uses screening, rather than diagnostic tools. However, the screening tools have been validated for assessment of anxiety disorders
- The use of a pre-selected panel of participants can lead to selection bias

## **Introduction**

The effect of the COVID-19 pandemic on the American public has been profound. By September 22<sup>nd</sup> 2020, more than 200,000 people have died from COVID-19 in the United States, and a number of unprecedented physical distancing policies, such as statewide shelter-in-place orders, continue to be implemented to halt the spread of the pandemic. These policies changed daily life for most people in the United States significantly and continue to have large scale social and economic consequences. The physical toll of COVID-19, coupled with the ubiquity and severity of these policies, distinguish the pandemic as a mass traumatic event, one that is associated with extensive loss of lives and financial strains that can lead to severe and lasting psychological consequences, anxiety disorders in particular.<sup>1-4</sup> Uncertainty, fear, economic and social costs, and disruptions to daily life all contribute to a high prevalence of anxiety disorders following mass traumatic events.<sup>5,6</sup> For example, a study assessing the mental health consequences of the Ebola epidemic in Sierra Leone found that, a year following the epidemic, 6% of participants reached the threshold for a combined anxiety-depression measure and 27% reached the threshold for post-traumatic stress disorder (PTSD).<sup>7</sup> Another study estimated that, following Hurricane Katrina, the 30-day prevalence of PTSD was 30.3% among residents of the New Orleans metropolitan area, which was severely affected by the hurricane.<sup>8</sup> This previous work suggests that the COVID-19 pandemic will have a substantial impact on the prevalence of anxiety disorders in the United States. Early evidence has found that COVID-19 pandemic is associated with adverse mental health consequences.<sup>9-17</sup> However, to our knowledge, the association between COVID-19 and related stressors—both due to the pandemic and policies implemented to halt its spread—on the risk of developing of anxiety disorders in the United States is yet to be fully documented. We assessed the prevalence of anxiety disorders, specifically probable generalized anxiety disorder (GAD) and post-traumatic stress symptoms (PTSS), as the COVID-19 pandemic unfolded in the United States. We also assessed the association between COVID-19 related stressors and the risk of developing of anxiety disorders following the implementation of wide-spread physical distancing policies in the United States.

## **Methods**

### **Data collection and sample**

This analysis was based on data from our COVID-19 and Life stressors Impact on Mental Health and Well-being Study (CLIMB). We collected nationally representative data using a random sample of adult participants in the AmeriSpeak Panel between March 31 and April 12, 2020. AmeriSpeak is a probability-based panel designed to be representative of households in the United States. The panel is funded and operated by the National Opinion Research Center (NORC) at the University of Chicago and their sampling frame covers approximately 97% of households in the country. The survey was offered to English-speaking participants who had completed an AmeriSpeak survey in the last 6 months.

In total, 1470 participants completed the survey, 1385 online and 85 via the phone, representing 64.3% of invited panelists. From those 1470 participants, 20 had missing data on either GAD or PTSS questions, which were removed; the final analysis included 1450 participants from the CLIMB study. The institutional review boards of NORC and Boston University Medical Campus (H-39986) approved the study. NORC obtained written consent from study participants when they first enrolled in the AmeriSpeak Panel.

### **Exposure variables**

Our structured survey included questions on demographic characteristics (gender, age, race, education, marital status, household income, household savings, and household size) and whether the respondent had or knew anyone who had COVID-19. The primary exposure of interest was reporting COVID-19 related stressors. The stressor list was based on prior analyses following traumatic events.<sup>13,18</sup> The stressor list included financial stressors (losing a job, having difficulty paying rent, having financial problems, a member of your family losing a job, and having hours reduced at your job) and social and emotional stressors (feeling alone, having relationship problems, family or relationship problems, not being able to get food due to shortages, not being able to get supplies due to shortages, challenges finding childcare, not going to school, travel restrictions, seeing family less in person, and death of someone close to you due to COVID-19). We excluded stressors that were applicable to only a subset of the population, ultimately

1  
2  
3 including 14 stressors in our analysis. We then created a cumulative stressor score and divided the score  
4 into three stressor categories, low (0-2 stressors), medium (3-4 stressors), and high (5-14 stressors). The  
5 score reflects the number of symptoms distribution in the sample with approximately one third of the  
6 sample in each category.  
7  
8  
9

### 10 11 **Outcome variables**

12 For psychological assessment, we used two validated anxiety disorders questionnaires. We used the  
13 GAD-7 to assess GAD. The cutoff for probable GAD in our analysis was 15 score or more. This cutoff  
14 was based on the recommended cutoffs for GAD-7 to screen for GAD.<sup>19</sup> We also conducted a sensitivity  
15 analysis with a cutoff of 10 score or more. We used the 4-items PTSD checklist (PCL) to screen for  
16 PTSS. The cutoff for PTSS was three score or more.<sup>20</sup>  
17  
18  
19  
20  
21  
22  
23

### 24 **Statistical analysis**

25 We used STATA 16.1 to conduct the analysis for this study. All analyses were weighted using complex  
26 survey weights to adjust for sample selection and post-stratification. We calculated the overall prevalence  
27 of probable GAD and PTSS and the prevalence of each outcome stratified by number of stressors. We  
28 then conducted a bivariable analysis comparing probable GAD and PTSS prevalence across demographic  
29 characteristics, stressor score, and each type of stressor using a two-tailed chi-square test. We used  
30 complete case analysis for the multivariable logistic regression models to estimate the odds ratios of the  
31 association between COVID-19 related stressor score and probable GAD and PTSS when controlling for  
32 gender, age, race, education, marital status, household income, household savings, and household size.  
33 We also constructed other multivariable logistic regression models with the number of stressors as a  
34 continuous variable and other models that divide the stressors into two continuous variables (financial  
35 stressors and social stressors) as sensitivity analyses. We followed the Strengthening the  
36 Reporting of Observational Studies in Epidemiology (STROBE) reporting  
37 guideline for cross-sectional studies when designing and reporting on  
38 this analysis.  
39  
40  
41  
42  
43  
44  
45  
46  
47  
48  
49  
50  
51  
52  
53  
54

### 55 **Patient and public involvement**

1  
2  
3 Patients and the public were not involved in the developing the research question, design, or  
4 implementation of this analysis. This primarily because we did not have funding to support such  
5 involvement and our analysis was on a national level using validated assessment tools.  
6  
7

## 8 **Results**

9  
10 Of the 1450 participants, 10.9% (95% CI: 9.1, 13.2) reached the threshold for probable GAD, using a  
11 score of 15 as a cutoff. When using 10 score as a cutoff point, 25% (95% CI: 22.2-28.0) reached the  
12 threshold for probable GAD. 21.7% (95% CI: 19.1-24.6) reported PTSS.  
13

14 Table 1 shows the association between demographic characteristics and the two outcomes. In particular,  
15 female sex was associated with a higher prevalence of both probable GAD and PTSS in the bivariable  
16 analysis. The prevalence of probable GAD was 14.1% (95% CI: 11.2-17.6) among females compared to  
17 7.6% (95% CI: 5.4-10.4) among males. The prevalence of probable PTSS was 26.1% (95% CI: 22.3-30.2)  
18 among females compared to 17% (95% CI: 13.5-21.2) among males. Other demographic variables  
19 associated with both outcomes were age and household savings. In the multivariable analysis, age and  
20 household savings were predictors of GAD while gender and old age were predictors of PTSS.  
21  
22

## 23 **COVID-19 related stressors and anxiety disorders**

24 Higher stressor score was associated with, and a predictor of, both probable GAD and PTSS. The  
25 prevalence of probable GAD was 4% (95% CI: 2.2-7.0) among participants with low stressor score, 8.6%  
26 (95% CI: 6.2-11.8) among participants with medium stressor score, and 20.5% (95% CI: 16.1-25.8)  
27 among participants with high stressor score. High stressor score was a predictor of probable GAD  
28 (OR=4.5, 95% CI: 2.3-8.8) compared to reporting a low stressor score. Including COVID-19 related  
29 stressors as a continuous variable in the multivariable model produced consistent results (OR=1.3, 95%  
30 CI: 1.2-1.4) (appendix table 1). Dividing COVID-19 related stressors into two continuous variables  
31 depending on the nature of the stressor in the multivariable model produced consistent results for  
32 financial stressors (OR=1.4, 95% CI: 1.2-1.6), and social and emotional stressors (OR=1.2, 95% CI: 1.1-  
33 1.5) (appendix table 2).  
34  
35  
36  
37  
38  
39  
40  
41  
42  
43  
44  
45  
46  
47  
48  
49  
50  
51  
52  
53  
54  
55  
56  
57  
58  
59  
60

1  
2  
3  
4  
5 The prevalence of PTSS was 12.4% (95% CI: 8.9-17.0) among participants with low stressor score,  
6  
7 17.4% (95% CI: 13.6-22.0) among participants with medium stressor score, and 35.7% (95% CI: 30.2-  
8  
9 41.6) among participants with high stressor score. Reporting a high stressor score, compared to a low  
10  
11 stressor score, was a predictor of PTSS (OR=3.3, 95% CI: 2.1-5.2) (Table 1). Including COVID-19  
12  
13 related stressors as a continuous variable in the multivariable model produced consistent results (OR=1.3,  
14  
15 95% CI: 1.2-1.4) (appendix table 1). Dividing COVID-19 related stressors into two continuous variables  
16  
17 the multivariable model depending on the nature of the stressor produced consistent results for financial  
18  
19 stressors (OR=1.3, 95% CI: 1.2-1.6), and social and emotional stressors (OR=1.3, 95% CI: 1.1-1.5)  
20  
21 (appendix table 2).  
22  
23  
24  
25

26 Figure 1 shows that reporting any COVID-19 related stressor, except for experiencing travel restrictions,  
27  
28 was associated with higher probable GAD prevalence. The greatest difference in probable GAD  
29  
30 prevalence by COVID-19 stressor was between participants who reported having family or relationship  
31  
32 problems (prevalence=27%, 95% CI: 19.6-36.1) compared to participants who did not report family or  
33  
34 relationship problems (prevalence=8.7%, 95% CI: 6.9-10.9). Other stressors leading to a significant  
35  
36 difference in probable GAD prevalence included feeling lonely, having difficulty paying the rent, losing a  
37  
38 job, having financial problems, and a household member losing a job. Figure 2 shows that participants  
39  
40 who reached the threshold for probable GAD reported, on average, experiencing a higher number of  
41  
42 stressors compared to participants who did not reach the threshold for probable GAD.  
43  
44

45 Figure 3 shows that reporting any COVID-19 related stressor was associated with higher PTSS  
46  
47 prevalence. The greatest significant difference in PTSS prevalence was between participants who reported  
48  
49 having financial problems (prevalence=37.2%, 95% CI: 31.1-43.7) compared to participants who did not  
50  
51 report having financial problems (prevalence=15.8%, 95% CI: 13.2-18.8). Other stressors leading to a  
52  
53 significant difference in PTSS prevalence included feeling alone, losing a job, and having difficulty  
54  
55 paying the rent, among others. Figure 4 shows that participants who reached the threshold for PTSS  
56  
57  
58  
59



1  
2  
3 reported, on average, experienced a higher number of stressors compared to participants who did not  
4 reach the threshold for PTSS.  
5

## 6 **Discussion**

7  
8 In a survey of a representative sample of adults in the United States conducted between March 31 and  
9 April 12, 10.9% reported a score indicative of probable GAD and 21% reported PTSS. These numbers are  
10 significantly higher than the expected prevalence of anxiety disorders in the United States. The National  
11 Comorbidity Survey replication estimated that the prevalence of GAD and PTSD in the United States  
12 were 3.1% and 3.5%, respectively.<sup>21</sup> Another analysis showed that the 12-month prevalence of GAD in  
13 United States in 2017 was 4%.<sup>22</sup> However, our results are lower than a recent analysis by Twenge and  
14 Joiner, which found that, compared to 2019, adults in the United States were more than three times as  
15 likely to screen positive for anxiety (using GAD-2) between April 23-May 2020. The study reports that  
16 on the week of May 21, 2020 29.4% of participants screened positive for GAD.<sup>14</sup> The difference in results  
17 can potentially be due to the higher threshold for screening positive for probable GAD by our screening  
18 tool.  
19  
20  
21  
22  
23  
24  
25  
26  
27  
28  
29  
30  
31

32 COVID-19 related stressors were associated with participants reporting more symptoms of GAD or  
33 PTSS. The prevalence of GAD was four times higher among participants reporting five or more stressors  
34 compared to participants reporting two or fewer stressors. The prevalence of PTSS was about three times  
35 higher among participants reporting five or more stressors compared to participants reporting two or  
36 fewer COVID-19 related stressors. This reinforces the hypothesis that COVID-19 behaves like a mass  
37 traumatic event, wherein experiences related to COVID-19 and its consequences are directly linked to  
38 adverse mental health consequences. These results are consistent with other epidemiologic analyses that  
39 studied COVID-19 stressors and mental health. For example, Fitzpatrick et al. found in a nationally  
40 representative sample that fear of COVID-19 was linked to both depression and anxiety, and that more  
41 than 25% of participants reported moderate to severe anxiety symptoms, which may warrant clinical  
42 treatment.<sup>23</sup> Another study found that between April 13 and May 19, young adults (18-20 years) reported  
43 high levels of GAD (45.4% with a 10 score cutoff) and PTSD symptoms (31.8% with a 45 PCL-C score  
44  
45  
46  
47  
48  
49  
50  
51  
52  
53  
54  
55  
56  
57  
58  
59  
60

1  
2  
3 cutoff).<sup>12,23</sup> Conditions associated with anxiety disorders often also lead to depression.<sup>24</sup> This is consistent  
4  
5 with our analysis that found that the prevalence of depression symptoms has risen during the study period  
6  
7 as well.<sup>25</sup>

8  
9 Our study is consistent with existing literature showing higher prevalence of anxiety disorders following  
10  
11 mass traumatic events, even if our results suggest the severity anxiety disorders due to the COVID-19  
12  
13 pandemic is greater than that previously recorded after other mass traumas.<sup>1</sup> Agyapong et al. reported that  
14  
15 the prevalence of GAD after one month following a wildfire—which physically, emotionally, and  
16  
17 economically affected the community—was 19.8%.<sup>26</sup> Their results were based on using a score of 10  
18  
19 points on the GAD-7 scale as the cutoff. Using the same cutoff, the prevalence of probable GAD in our  
20  
21 analysis rises to 25%. Silver et al. found that 17% of the United States population that lives outside New  
22  
23 York city reported PTSS two months after the September 11 terrorist attack.<sup>27</sup>

24  
25 Our study complements emerging studies from China showing that COVID-19 has led to adverse  
26  
27 psychological consequences.<sup>9,28</sup> We add to the literature by quantifying the probable prevalence of GAD  
28  
29 and PTSS as the COVID-19 pandemic unfolded in the United States. Our results also support analysis  
30  
31 from Nelson et al. showing the widespread concerns and stressors due to COVID-19 in the United  
32  
33 States.<sup>10</sup> Our work both describes the experience of particular stressors and quantifies their contribution  
34  
35 to the risk of developing of anxiety disorders in the country. In particular, we show that financial (e.g.  
36  
37 having difficulty paying the rent) and social and emotional (e.g. feeling lonely) stressors contribute to  
38  
39 higher rates of both probable GAD and PTSS, which aligns with existing literature.<sup>6</sup>

40  
41  
42  
43 These results should be considered with the following limitations in mind. First, our study uses screeners  
44  
45 for GAD and PTSS. A definitive diagnosis of either will require clinical assessment. As such, these  
46  
47 results should be confirmed in a representative sample using diagnostic tools. However, both screening  
48  
49 questionnaires in our analysis are validated tools used to approximate the prevalence of GAD and PTSS  
50  
51 in the population.<sup>19,20</sup> Second, the use of a pre-specified panel can lead to selection bias. However,  
52  
53 AmeriSpeak panel has been used reliably for years to provide representative samples of the United  
54  
55 States.<sup>29</sup> Third, our post-only design, which does not allow for information on the mental health status of  
56  
57  
58  
59  
60

1  
2  
3 the participants, suggests that we cannot directly link the epidemic, and the policies implemented to tackle  
4 it, to a subsequent increased risk of developing of anxiety disorders. However, the specificity of stressors  
5 reported, and the high risk of developing of reported anxiety disorders, consistent with previous  
6 knowledge and expectation, strongly suggest that we are observing reliable associations that can be  
7 further examined in subsequent longitudinal work.  
8  
9  
10  
11  
12

### 13 **Conclusion**

14  
15 The risk of developing of anxiety disorders as the COVID-19 pandemic unfolded in the United States  
16 appears substantially higher than expected baseline prevalence and of the risk of developing reported  
17 following other mass traumatic events. This potentially reflects the scale of the epidemic, the ubiquity of  
18 policies implemented to tackle it, and the economic and social consequences of both. Persons  
19 experiencing COVID-19 related stressors, particularly financial, and social and emotional stressors, were  
20 more likely to report both probable GAD and PTSS indicating the driving role these stressors are playing  
21 in increasing the risk of developing of anxiety disorders in the United States. COVID-19 mitigation  
22 policies need to take into account the effect of pandemic-related stressors on the mental health of the  
23 United States population.  
24  
25  
26  
27  
28  
29  
30  
31  
32  
33  
34  
35  
36  
37  
38  
39  
40  
41  
42  
43  
44  
45  
46  
47  
48  
49  
50  
51  
52  
53  
54  
55  
56  
57  
58  
59  
60

1  
2  
3 **Contributors:** CKE and SMA developed the first draft of the survey. SG reviewed the survey. SMA  
4 conducted the data analysis and wrote the manuscript draft. CKE, GHC, and SG contributed to study  
5 conception and manuscript drafting. All authors acknowledge full responsibility for the analyses and  
6 interpretation of the report. The corresponding author attests that all listed authors meet authorship criteria  
7 and that no others meeting the criteria have been omitted.  
8  
9

10  
11  
12  
13 **Funding:** The research was funded by the Rockefeller Foundation-Boston University 3-D Commission  
14 (grant number 2019 HTH 024). The Rockefeller Foundation had no role in the design and conduct of the  
15 study; collection, management, analysis, and interpretation of the data; preparation, review, or approval of  
16 the manuscript; or the decision to submit the manuscript for publication.  
17  
18

19  
20  
21  
22 **Competing interests:** All authors have completed the ICMJE uniform disclosure form at  
23 [http://www.icmje.org/coi\\_disclosure.pdf](http://www.icmje.org/coi_disclosure.pdf) and declare: support from the Rockefeller Foundation-Boston  
24 University 3-D Commission; no financial relationships with any organisation that might have an interest  
25 in the submitted work in the previous three years; no other relationships or activities that could appear to  
26 have influenced the submitted work.  
27  
28

29  
30  
31  
32 **Data sharing:** authors may share the data upon reasonable requests  
33

34  
35 **Transparency statement:** The lead authors affirm that the manuscript is an honest, accurate, and  
36 transparent account of the study being reported; that no important aspects of the study have been omitted;  
37 and that any discrepancies from the study as planned (and, if relevant, registered) have been explained.  
38  
39

40  
41 **Dissemination to participants and related patient and public communities:** There are no immediate  
42 plans to directly disseminate the analysis results to directly to the participants o as this study analyzed  
43 deidentified data. However, we aim to widely disseminate the results through our institution website and  
44 social media outlets to reach the public.  
45  
46  
47  
48

#### 49 **Figure caption**

50  
51 Figure 1: Prevalence of probable generalized anxiety disorder (GAD) for persons reporting different  
52 COVID-19 stressors  
53

54  
55 Figure 2: Distribution of number of stressors among participants depending on whether they reported  
56 symptoms consistent with probable generalized anxiety disorder (GAD) status  
57  
58

1  
2  
3 Figure 3: Prevalence of Post-traumatic stress symptoms (PTSS) for persons reporting different COVID-  
4 19 stressors  
5

6 Figure 4: Distribution of number of stressors among participants depending on whether they reach the  
7 cut-off for post-traumatic stress symptoms (PTSS) status  
8  
9  
10  
11  
12  
13  
14  
15  
16  
17  
18  
19  
20  
21  
22  
23  
24  
25  
26  
27  
28  
29  
30  
31  
32  
33  
34  
35  
36  
37  
38  
39  
40  
41  
42  
43  
44  
45  
46  
47  
48  
49  
50  
51  
52  
53  
54  
55  
56  
57  
58  
59  
60

For peer review only

## References

1. Goldmann E, Galea S. Mental Health Consequences of Disasters. *Annu Rev Public Health*. 2014;35(1):169-183. doi:10.1146/annurev-publhealth-032013-182435
2. Ni MY, Kim Y, McDowell I, et al. Mental health during and after protests, riots and revolutions: A systematic review. *Aust N Z J Psychiatry*. 2020;54(3):232-243. doi:10.1177/0004867419899165
3. Peng EYC, Lee MB, Tsai ST, et al. Population-based post-crisis psychological distress: An example from the SARS outbreak in Taiwan. *J Formos Med Assoc*. 2010;109(7):524-532. doi:10.1016/S0929-6646(10)60087-3
4. David D, Mellman TA, Mendoza LM, Kulick-Bell R, Ironson G, Schneiderman N. Psychiatric morbidity following Hurricane Andrew. *J Trauma Stress*. 1996;9(3):607-612. doi:10.1007/BF02103669
5. Jeong H, Yim HW, Song YJ, et al. Mental health status of people isolated due to Middle East Respiratory Syndrome. *Epidemiol Health*. 2016;38:e2016048. doi:10.4178/epih.e2016048
6. Viseu J, Leal R, de Jesus SN, Pinto P, Pechorro P, Greenglass E. Relationship between economic stress factors and stress, anxiety, and depression: Moderating role of social support. *Psychiatry Res*. 2018;268:102-107. doi:10.1016/j.psychres.2018.07.008
7. Jalloh MF, Li W, Bunnell RE, et al. Impact of Ebola experiences and risk perceptions on mental health in Sierra Leone, July 2015. *BMJ Glob Heal*. 2018;3(2):e000471. doi:10.1136/bmjgh-2017-000471
8. Galea S, Brewin CR, Gruber M, et al. Exposure to hurricane-related stressors and mental illness after Hurricane Katrina. *Arch Gen Psychiatry*. 2007;64(12):1427-1434. doi:10.1001/archpsyc.64.12.1427
9. Cao W, Fang Z, Hou G, et al. The psychological impact of the COVID-19 epidemic on college students in China. *Psychiatry Res*. 2020;287. doi:10.1016/j.psychres.2020.112934
10. Nelson LM, Simard JF, Oluyomi A, et al. US Public Concerns about the COVID-19 Pandemic from Results of a Survey Given via Social Media. *JAMA Intern Med*. 2020.

- 1  
2  
3 doi:10.1001/jamainternmed.2020.1369  
4  
5 11. Wang C, Pan R, Wan X, et al. Immediate psychological responses and associated factors during  
6 the initial stage of the 2019 coronavirus disease (COVID-19) epidemic among the general  
7 population in China. *Int J Environ Res Public Health*. 2020;17(5). doi:10.3390/ijerph17051729  
8  
9  
10  
11 12. Liu CH, Zhang E, Wong GTF, Hyun S, Hahm H “Chris.” Factors associated with depression,  
12 anxiety, and PTSD symptomatology during the COVID-19 pandemic: Clinical implications for  
13 U.S. young adult mental health. *Psychiatry Res*. 2020;290:113172.  
14  
15  
16 doi:10.1016/j.psychres.2020.113172  
17  
18  
19  
20 13. Boardman JD, Finch BK, Ellison CG, Williams DR, Jackson JS. Neighborhood disadvantage,  
21 stress, and drug use among adults. *J Health Soc Behav*. 2001;42(2):151-165. doi:10.2307/3090175  
22  
23  
24 14. Twenge JM, Joiner TE. U.S. Census Bureau-assessed prevalence of anxiety and depressive  
25 symptoms in 2019 and during the 2020 COVID-19 pandemic. *Depress Anxiety*. 2020;37(10):954-  
26 956. doi:10.1002/da.23077  
27  
28  
29  
30 15. Salari N, Khazaie H, Hosseini-Far A, et al. The prevalence of stress, anxiety and depression  
31 within front-line healthcare workers caring for COVID-19 patients: a systematic review and meta-  
32 regression. *Hum Resour Health*. 2020;18(1):100. doi:10.1186/s12960-020-00544-1  
33  
34  
35  
36 16. Lasheras I, Gracia-García P, Lipnicki DM, et al. Prevalence of anxiety in medical students during  
37 the covid-19 pandemic: A rapid systematic review with meta-analysis. *Int J Environ Res Public*  
38 *Health*. 2020;17(18):1-12. doi:10.3390/ijerph17186603  
39  
40  
41  
42  
43 17. Salari N, Hosseini-Far A, Jalali R, et al. Prevalence of stress, anxiety, depression among the  
44 general population during the COVID-19 pandemic: A systematic review and meta-analysis.  
45 *Global Health*. 2020;16(1):57. doi:10.1186/s12992-020-00589-w  
46  
47  
48  
49 18. Galea S, Tracy M, Norris F, Coffey SF. Financial and social circumstances and the incidence and  
50 course of PTSD in Mississippi during the first two years after Hurricane Katrina. *J Trauma Stress*.  
51 2008;21(4):357-368. doi:10.1002/jts.20355  
52  
53  
54  
55 19. Spitzer RL, Kroenke K, Williams JBW, Löwe B. A brief measure for assessing generalized  
56  
57  
58  
59  
60

- 1  
2  
3 anxiety disorder: The GAD-7. *Arch Intern Med*. 2006;166(10):1092-1097.  
4  
5 doi:10.1001/archinte.166.10.1092  
6
- 7 20. Bliese PD, Wright KM, Adler AB, Cabrera O, Castro CA, Hoge CW. Validating the Primary Care  
8 Posttraumatic Stress Disorder Screen and the Posttraumatic Stress Disorder Checklist With  
9 Soldiers Returning From Combat. *J Consult Clin Psychol*. 2008;76(2):272-281. doi:10.1037/0022-  
10 006X.76.2.272  
11  
12  
13  
14  
15
- 16 21. Kessler RC, Wai TC, Demler O, Walters EE. Prevalence, severity, and comorbidity of 12-month  
17 DSM-IV disorders in the National Comorbidity Survey Replication. *Arch Gen Psychiatry*.  
18 2005;62(6):617-627. doi:10.1001/archpsyc.62.6.617  
19  
20  
21
- 22 22. Ruscio AM, Hallion LS, Lim CCW, et al. Cross-sectional comparison of the epidemiology of  
23 DSM-5 generalized anxiety disorder across the globe. *JAMA Psychiatry*. 2017;74(5):465-475.  
24  
25 doi:10.1001/jamapsychiatry.2017.0056  
26  
27
- 28 23. Fitzpatrick KM, Harris C, Drawve G. Fear of COVID-19 and the Mental Health Consequences in  
29 America. *Psychol Trauma Theory, Res Pract Policy*. 2020;12(S1). doi:10.1037/tra0000924  
30  
31  
32
- 33 24. Bueno-Notivol J, Gracia-García P, Olaya B, Lasheras I, López-Antón R, Santabárbara J.  
34 Prevalence of depression during the COVID-19 outbreak: A meta-analysis of community-based  
35 studies. *Int J Clin Heal Psychol*. 2021;21(1):100196. doi:10.1016/j.ijchp.2020.07.007  
36  
37  
38
- 39 25. Ettman CK, Abdalla SM, Cohen GH, Sampson L, Vivier PM, Galea S. Prevalence of Depression  
40 Symptoms in US Adults Before and During the COVID-19 Pandemic. *JAMA Netw Open*.  
41 2020;3(9):e2019686. doi:10.1001/jamanetworkopen.2020.19686  
42  
43  
44
- 45 26. Agyapong VIO, Hrabok M, Juhas M, et al. Prevalence rates and predictors of generalized anxiety  
46 disorder symptoms in residents of fort mcmurray six months after a wildfire. *Front Psychiatry*.  
47 2018;9. doi:10.3389/fpsy.2018.00345  
48  
49  
50
- 51 27. Silver RC, Alison Holman E, McIntosh DN, Poulin M, Gil-Rivas V. Nationwide longitudinal  
52 study of psychological responses to September 11. *J Am Med Assoc*. 2002;288(10):1235-1244.  
53  
54  
55  
56  
57  
58  
59  
60



- 1  
2  
3 28. Lai J, Ma S, Wang Y, et al. Factors Associated With Mental Health Outcomes Among Health Care  
4 Workers Exposed to Coronavirus Disease 2019. *JAMA Netw open*. 2020;3(3):e203976.  
5  
6 doi:10.1001/jamanetworkopen.2020.3976  
7  
8  
9 29. AmeriSpeak: NORC's Breakthrough Panel-Based Research Platform | NORC.org.  
10  
11 <https://www.norc.org/Research/Capabilities/Pages/amerispeak.aspx>. Accessed May 18, 2020.  
12  
13  
14  
15  
16  
17  
18  
19  
20  
21  
22  
23  
24  
25  
26  
27  
28  
29  
30  
31  
32  
33  
34  
35  
36  
37  
38  
39  
40  
41  
42  
43  
44  
45  
46  
47  
48  
49  
50  
51  
52  
53  
54  
55  
56  
57  
58  
59  
60

**Table 1: Probable Generalized Anxiety Disorder (GAD) and post-traumatic stress symptoms (PTSS) in adults 18 years and older in the U.S. by demographic characteristics and COVID-19 related stressors.**

|                                 | N (%)         | Probable Generalized Anxiety Disorder |         |                     | Post-traumatic stress symptoms |                     |         |                     |         |
|---------------------------------|---------------|---------------------------------------|---------|---------------------|--------------------------------|---------------------|---------|---------------------|---------|
|                                 |               | % (95% CI)                            | P-value | Odds ratio (95% CI) | P-value                        | % (95% CI)          | P-value | Odds ratio (95% CI) | P-value |
| <b>Overall</b>                  | 1450          | 10.9<br>(9.1–13.2)                    |         |                     |                                | 21.7<br>(19.1–24.6) |         |                     |         |
| <b>Sex</b>                      |               |                                       |         |                     |                                |                     |         |                     |         |
| Male                            | 725<br>(48.2) | 7.6<br>(5.4–10.4)                     | 0.0018  | ref                 |                                | 17<br>(13.5–21.2)   | 0.0017  | ref                 |         |
| Female                          | 725<br>(51.8) | 14.1<br>(11.2–17.6)                   |         | 1.6<br>(1.0–2.5)    | 0.055                          | 26.1<br>(22.3–30.2) |         | 1.5<br>(1.1–2.1)    | 0.024   |
| <b>Age</b>                      |               |                                       |         |                     |                                |                     |         |                     |         |
| 18-39 y                         | 623<br>(38.1) | 16.6<br>(13.0–21.2)                   | <0.0001 | ref                 |                                | 26.1<br>(21.1–31.3) | <0.0001 | ref                 |         |
| 40-59 y                         | 461<br>(32.0) | 9.2<br>(6.6–12.6)                     |         | 0.6<br>(0.3–1.0)    | 0.035                          | 25.5<br>(20.9–30.7) |         | 1.0<br>(0.7–1.6)    | 0.850   |
| ≥60 y                           | 366<br>(29.9) | 5.6<br>(3.4–9.1)                      |         | 0.50<br>(0.2–1.1)   | 0.078                          | 12.0<br>(8.5–16.6)  |         | 0.6<br>(0.3–1.0)    | 0.050   |
| <b>Race/Ethnicity</b>           |               |                                       |         |                     |                                |                     |         |                     |         |
| Non-Hispanic White              | 939<br>(62.9) | 10.8<br>(8.6–13.5)                    | 0.3468  | ref                 |                                | 22.0<br>(18.9–25.4) | 0.1914  | ref                 |         |
| Non-Hispanic Black              | 143<br>(11.9) | 11.9<br>(6.8–20.1)                    |         | 0.8<br>(0.4–1.8)    | 0.603                          | 18.9<br>(12.5–27.6) |         | 0.7<br>(0.4–1.2)    | 0.157   |
| Hispanic                        | 258<br>(16.7) | 11.3<br>(6.8–18.3)                    |         | 0.8<br>(0.4–1.3)    | 0.307                          | 27.0<br>(19.5–36.2) |         | 1.1<br>(0.7–1.8)    | 0.749   |
| Non-Hispanic Asian              | 36<br>(3.1)   | 0.8<br>(0.1–5.5)                      |         | 0.1<br>(0.0–0.7)    | 0.023                          | 8.7<br>(2.4–26.8)   |         | 0.3<br>(0.1–1.5)    | 0.142   |
| Other                           | 74<br>(5.4)   | 15.1<br>(7.4–28.6)                    |         | 1.1<br>(0.4–2.7)    | 0.919                          | 15.8<br>(7.7–29.5)  |         | 0.6<br>(0.3–1.2)    | 0.131   |
| <b>Education</b>                |               |                                       |         |                     |                                |                     |         |                     |         |
| No high school diploma          | 67<br>(9.9)   | 13.4<br>(6.2–26.5)                    | 0.0230  | 1.3<br>(0.5–3.2)    | 0.643                          | 19.7<br>(10.9–32.8) | 0.3825  | 0.7<br>(0.4–1.5)    | 0.393   |
| High school grad or GED         | 276<br>(27.9) | 10.4<br>(6.8–15.4)                    |         | 1.19<br>(0.6–2.4)   | 0.615                          | 25.3<br>(19.5–32.2) |         | 1.2<br>(0.7–1.9)    | 0.560   |
| Some college                    | 638<br>(27.6) | 15.8<br>(12.4–20.0)                   |         | 2.0<br>(1.2–3.4)    | 0.013                          | 22.2<br>(18.5–26.5) |         | 1.0<br>(0.7–1.5)    | 0.933   |
| College grad or more            | 469<br>(34.6) | 6.8<br>(4.7–9.7)                      |         | ref                 |                                | 18.9<br>(15.2–23.3) |         | ref                 |         |
| <b>Marital status</b>           |               |                                       |         |                     |                                |                     |         |                     |         |
| Married                         | 716<br>(47.8) | 7.6<br>(5.6–10.3)                     | 0.0016  | ref                 |                                | 19.0<br>(15.8–22.8) | 0.1686  | ref                 |         |
| Widowed, divorced, or separated | 254<br>(18.8) | 10.2<br>(6.8–15.1)                    |         | 1.3<br>(0.7–2.6)    | 0.392                          | 20.9<br>(15.3–27.9) |         | 1.1<br>(0.7–1.9)    | 0.693   |
| Never married                   | 345<br>(24.1) | 14.3<br>(10.0–20.2)                   |         | 1.4<br>(0.8–2.6)    | 0.273                          | 24.9<br>(19.0–31.9) |         | 1.2<br>(0.7–1.8)    | 0.566   |
| Living with partner             | 135<br>(9.3)  | 20.8<br>(12.7–32.0)                   |         | 1.5<br>(0.7–2.9)    | 0.286                          | 28.6<br>(19.5–39.8) |         | 1.0<br>(0.6–1.7)    | 0.925   |
| <b>Household income</b>         |               |                                       |         |                     |                                |                     |         |                     |         |
| \$0 - \$19,999                  | 251<br>(20.3) | 16.9<br>(11.7–23.7)                   | 0.0311  | 0.9<br>(0.4–1.9)    | 0.746                          | 28.6<br>(21.7–36.8) | 0.1188  | 1.2<br>(0.6–2.2)    | 0.660   |
| \$20,000 - \$44,999             | 358<br>(25.7) | 12.0<br>(8.4–17.0)                    |         | 0.6<br>(0.3–1.3)    | 0.219                          | 19.5<br>(15.1–24.8) |         | 0.7<br>(0.4–1.2)    | 0.158   |
| \$45,000 - \$74,999             | 356<br>(24.8) | 9.0<br>(6.0–13.2)                     |         | 0.6<br>(0.3–1.2)    | 0.138                          | 22.0<br>(17.0–28.1) |         | 0.9<br>(0.6–1.5)    | 0.688   |
| ≥\$75,000                       | 452<br>(29.2) | 8.5<br>(5.7–12.6)                     |         | ref                 |                                | 19.7<br>(15.3–25.0) |         | ref                 |         |
| <b>Household savings</b>        |               |                                       |         |                     |                                |                     |         |                     |         |

|                                     |               |                       |         |                    |         |                       |         |                    |         |
|-------------------------------------|---------------|-----------------------|---------|--------------------|---------|-----------------------|---------|--------------------|---------|
| \$0 - \$4,999                       | 578<br>(42.9) | 17.2<br>(13.6 – 21.6) | <0.0001 | 1.9<br>(1.2 – 3.1) | 0.010   | 27.6<br>(23.2 – 32.6) | 0.0011  | 1.2<br>(0.8 – 1.9) | 0.349   |
| ≥\$5,000                            | 827<br>(57.1) | 6.9<br>(5.0 – 9.3)    |         | ref                |         | 18.0<br>(14.8 – 21.8) |         | ref                |         |
| <b>COVID-related stressor score</b> |               |                       |         |                    |         |                       |         |                    |         |
| Low                                 | 460<br>(31.2) | 4.0<br>(2.2 – 7.0)    | <0.0001 | ref                |         | 12.4<br>(8.9 – 17.0)  | <0.0001 | ref                |         |
| Medium                              | 544<br>(37.0) | 8.6<br>(6.2 – 11.8)   |         | 2.0<br>(1.0 – 4.0) | 0.046   | 17.4<br>(13.6 – 22.0) |         | 1.4<br>(0.9 – 2.3) | 0.139   |
| High                                | 446<br>(31.8) | 20.5<br>(16.1 – 25.8) |         | 4.5<br>(2.3 – 8.8) | <0.0001 | 35.7<br>(30.2 – 41.6) |         | 3.3<br>(2.1 – 5.2) | <0.0001 |
| Household size (mean)               | 3.2           |                       |         | 1.0<br>(0.8– 1.1)  | 0.710   |                       |         | 1.0<br>(0.9 – 1.1) | 0.910   |

All percentages are weighted. Missing data: household income (n=33), household savings (n=45), and COVID-19 stressor score (n=3). GED is the general education diploma. COVID-19 stressor score calculated from stressor summation ranging from 0-13; categories represent low (score of 0-2), medium (score of 3-4), and high (score of 5-14) exposure to stressors due to COVID-19. GAD defined by a GAD-7 score ≥15. PTSS defined by a 4-item PTSD checklist (PCL) score ≥3. Two-tailed chi-square analysis conducted for significance testing.

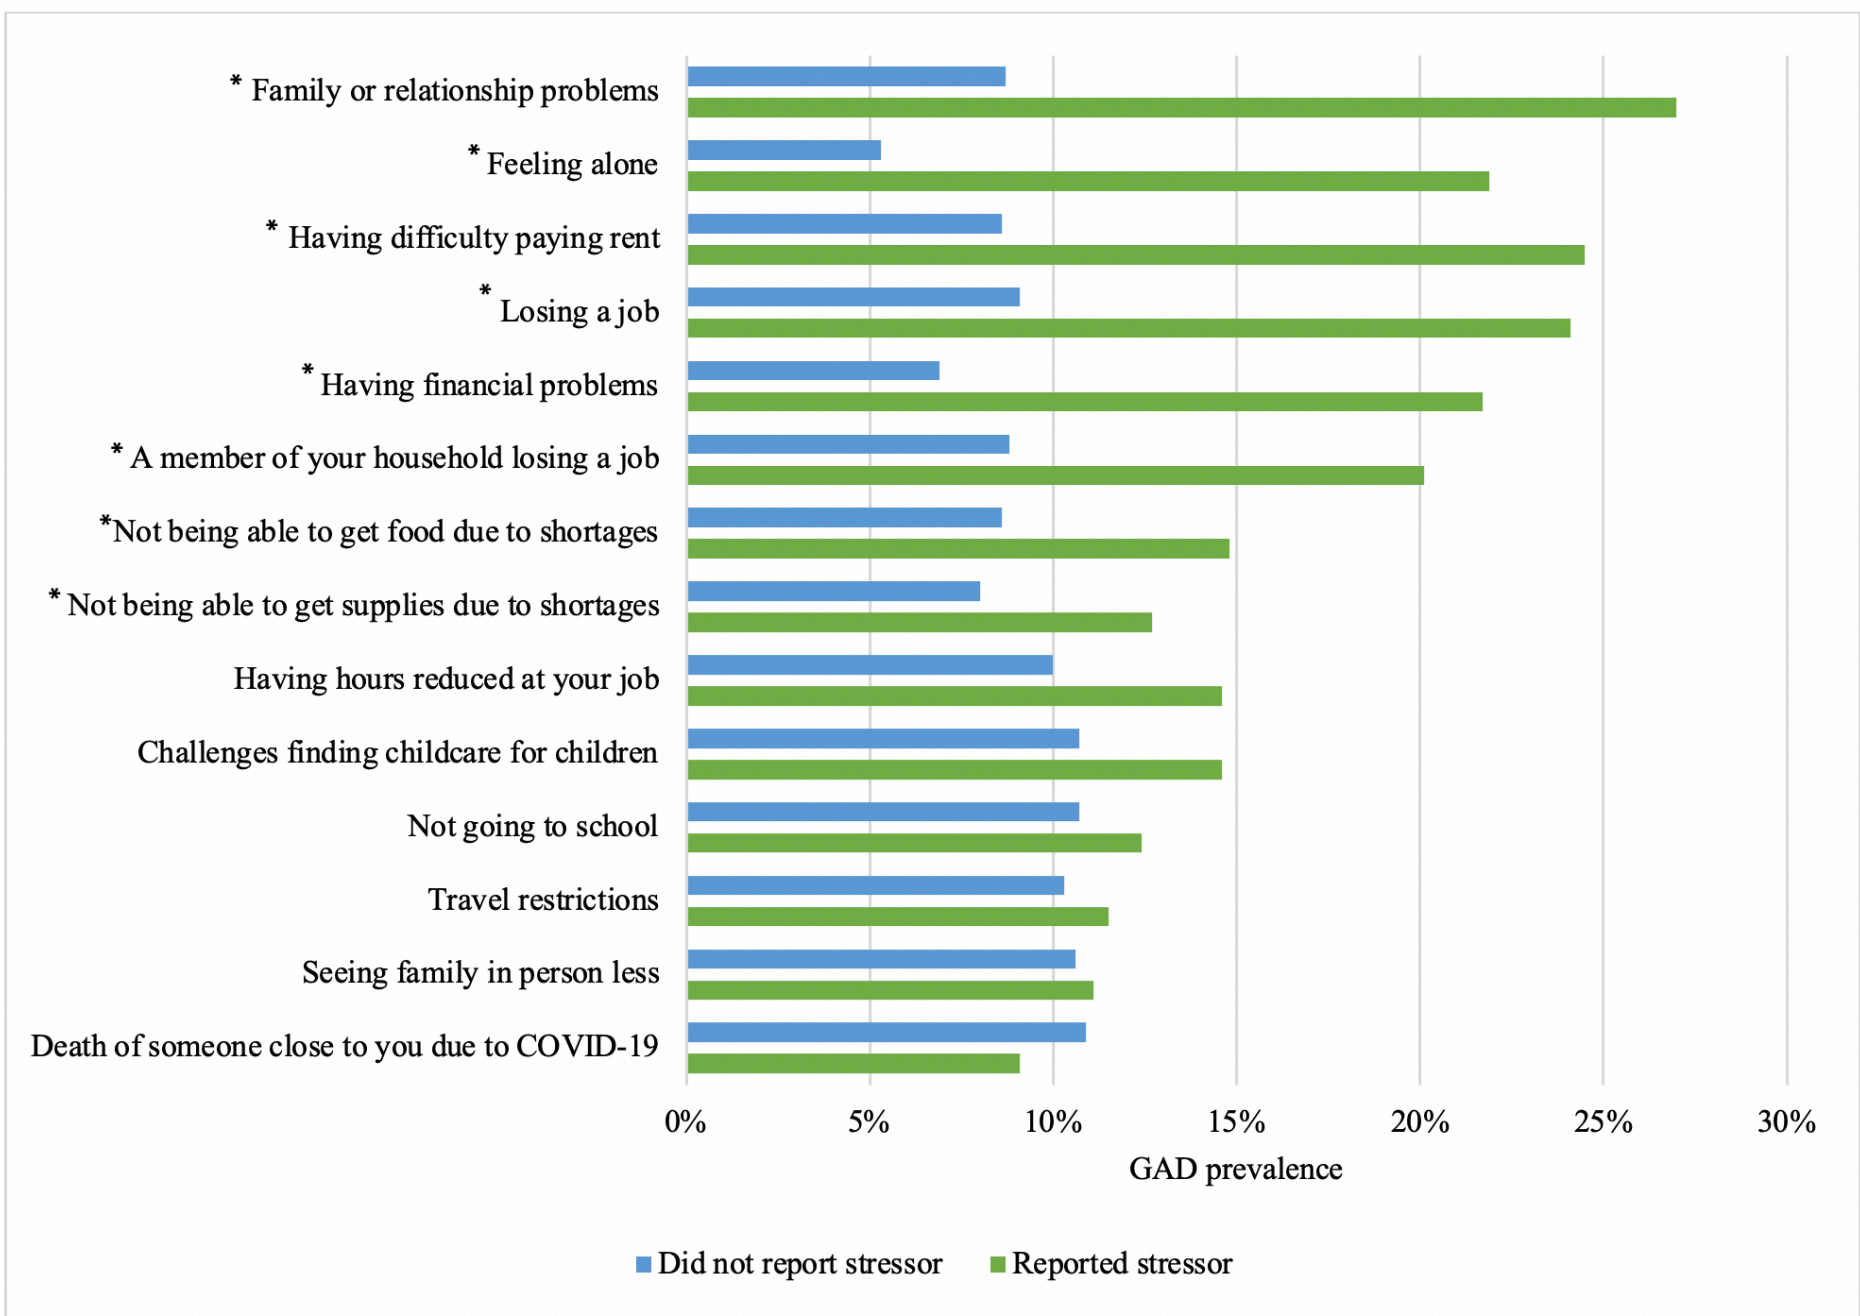

\*P<0.05  
 GAD defined by a GAD-7 score ≥15. Percentages are weighted to the U.S. population. This analysis is based on data from the COVID-19 and Life stressors Impact on Mental Health and Well-being Study (CLIMB).  
 For peer review only: <http://bmjopen.bmj.com/site/about/guidelines.xhtml>

**Figure 2: Distribution of total number of COVID-19 stressors by probable generalized anxiety disorder (GAD) status**

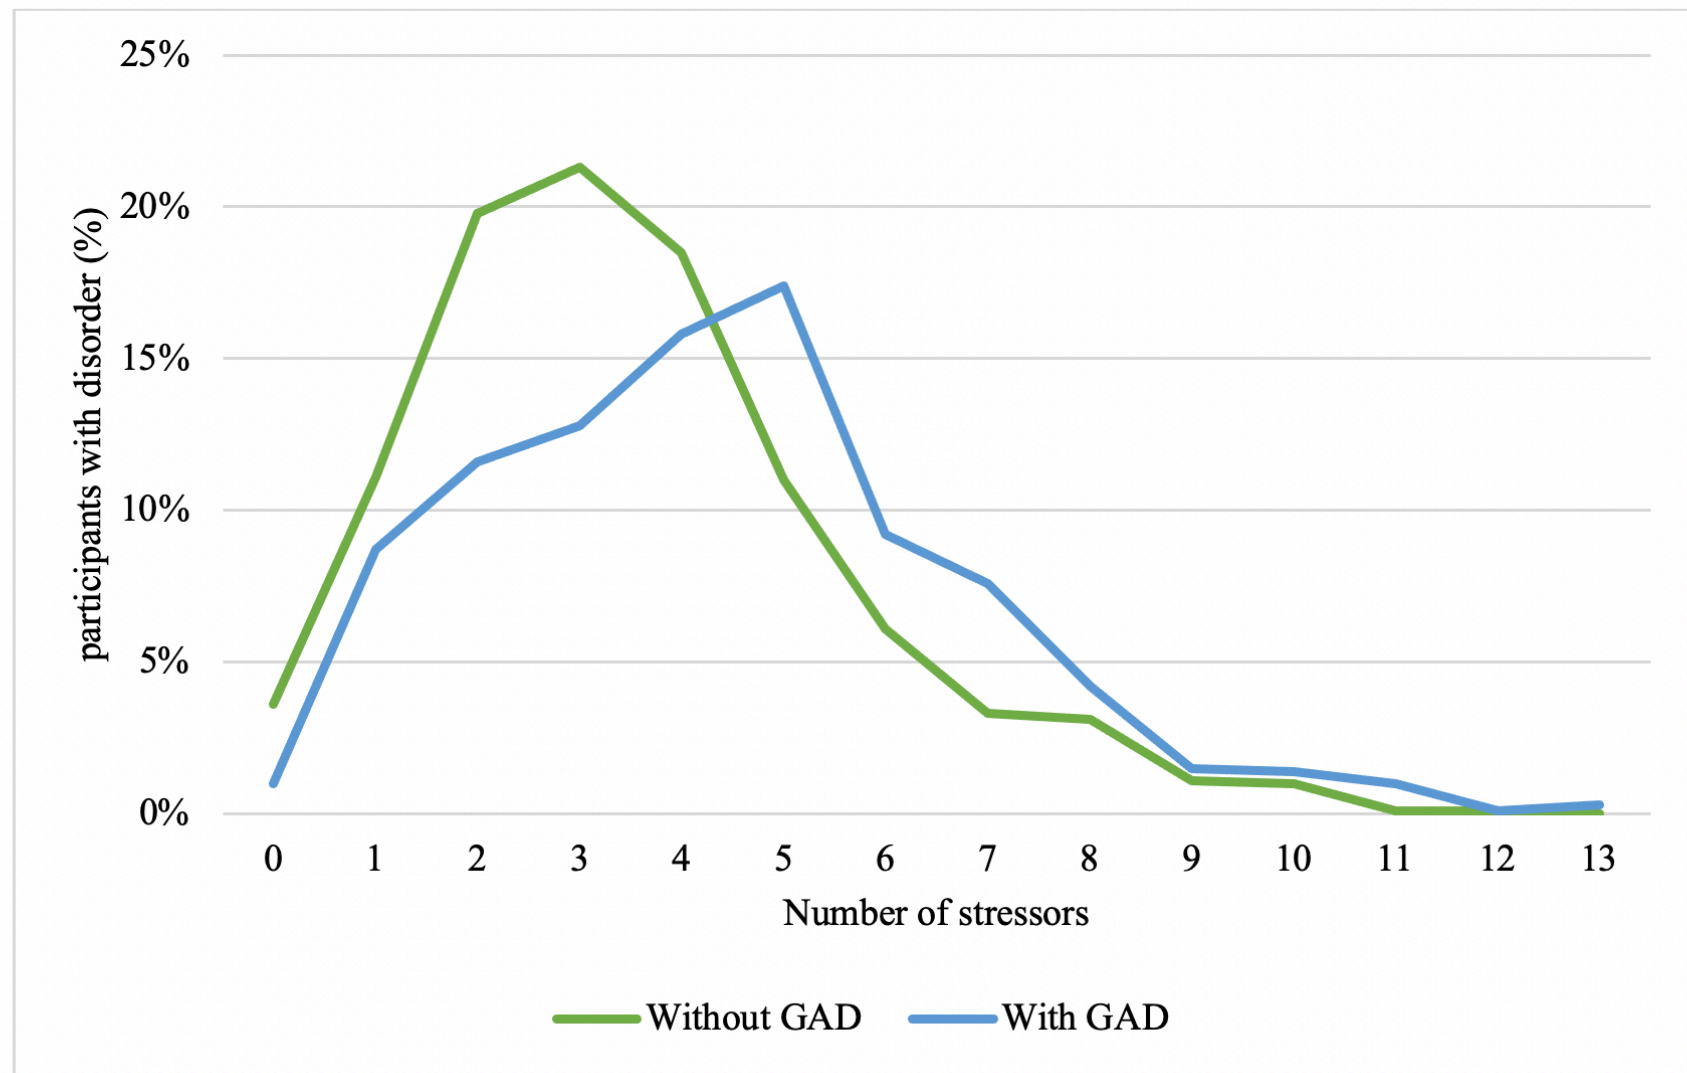

GAD defined by a GAD-7 score  $\geq 15$ . Percentages are weighted to the U.S. population. This analysis is based on data from the COVID-19 and Life stressors Impact on Mental Health and Well-being Study (CLIMB).

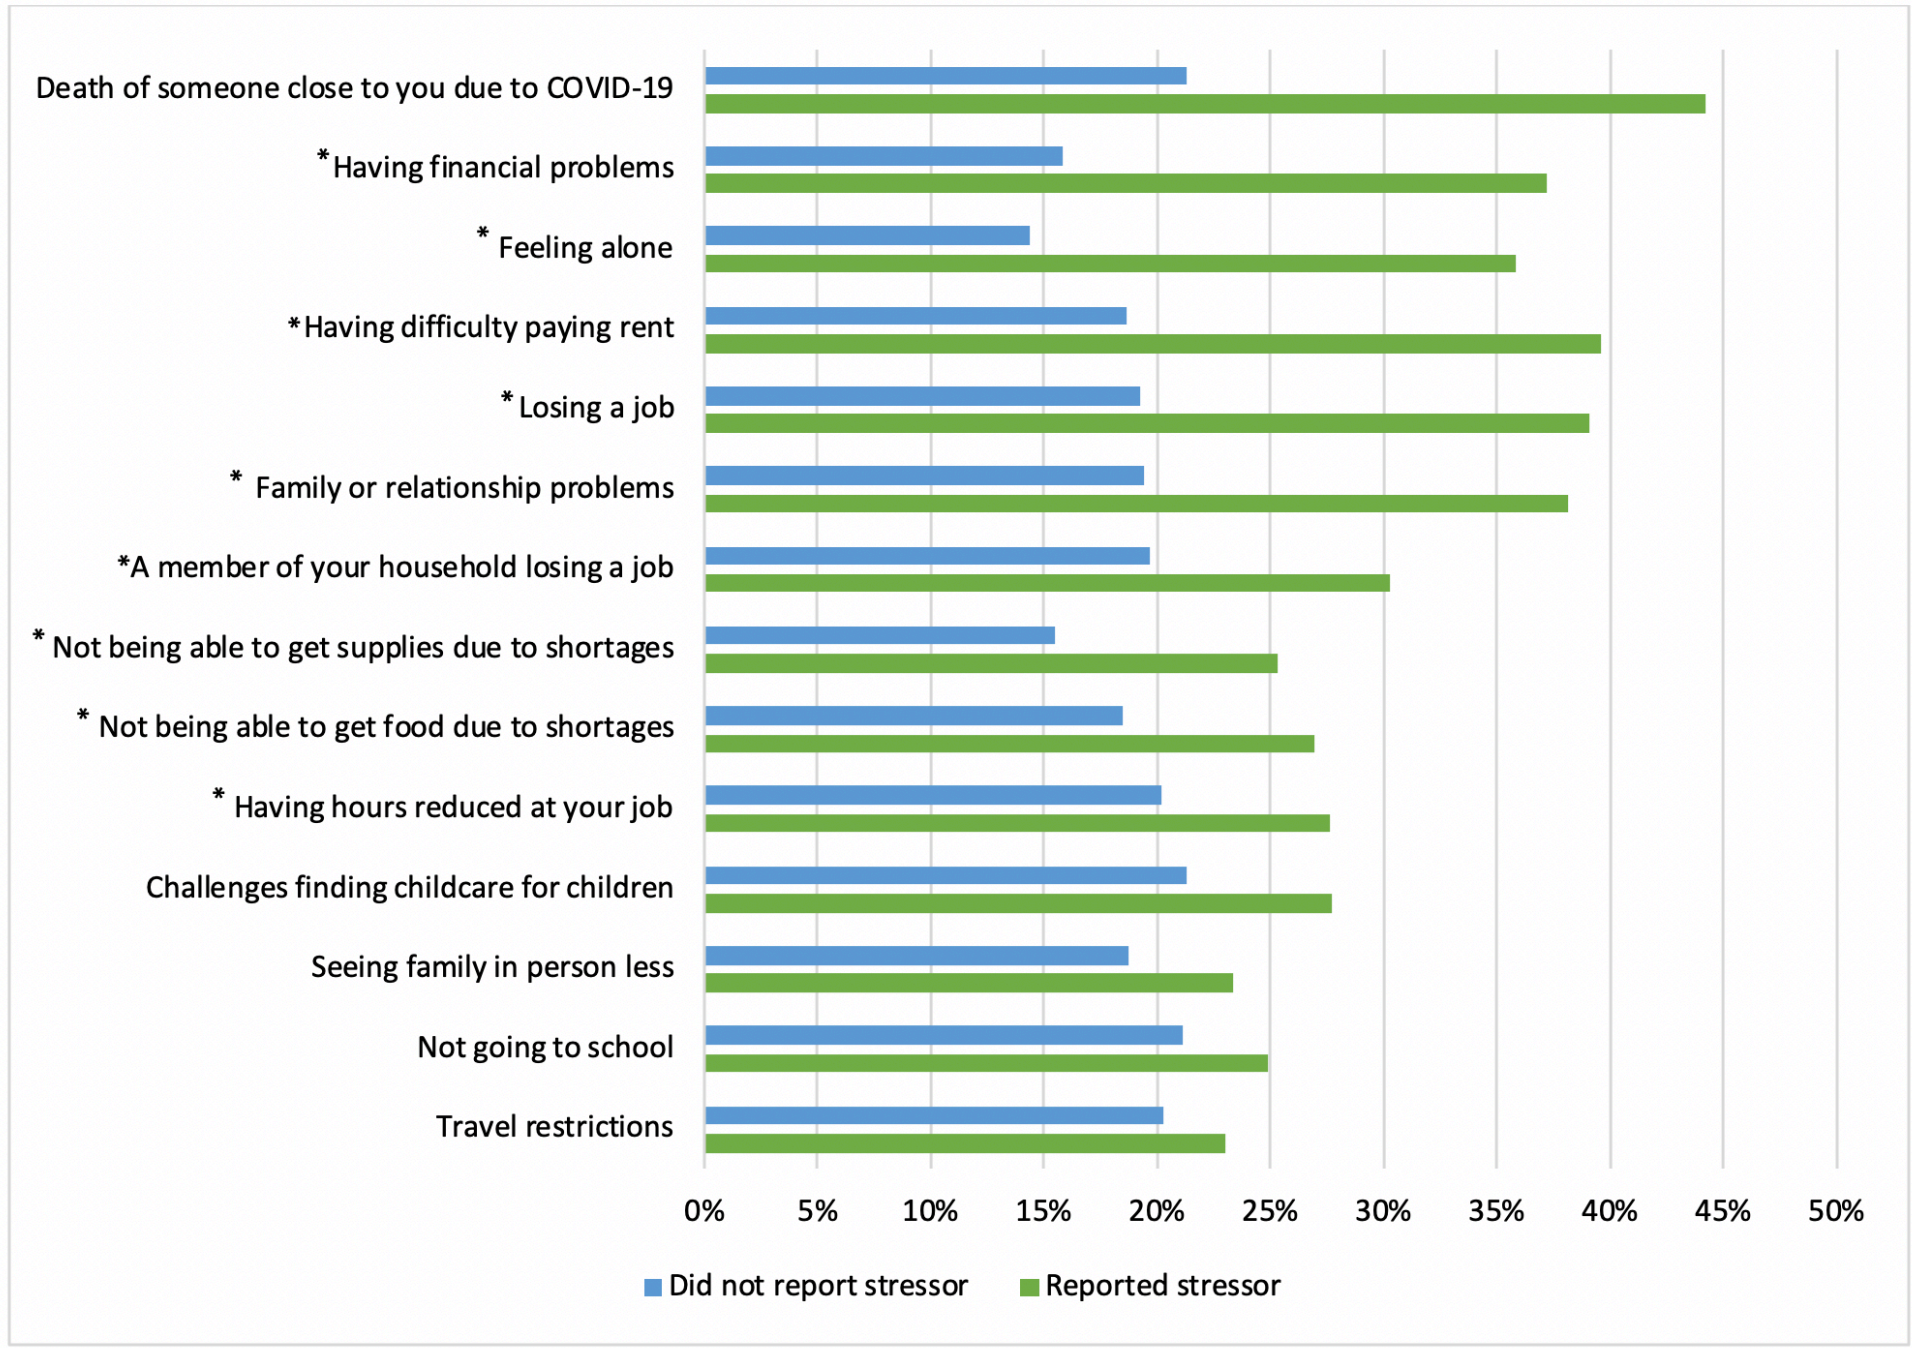

\*P<0.05

For peer review only - <http://bmjopen.bmj.com/site/about/guidelines.xhtml>

PTSS defined by a 4-item PTSD checklist (PCL) score  $\geq 3$ . Percentages are weighted to the U.S. population. This analysis is based on data from our COVID-19 and Life stressors Impact on Mental Health and Well-being Study (CLIMB).

**Figure 4: Distribution of total number of COVID-19 stressors by post-traumatic stress symptoms (PTSS) status**

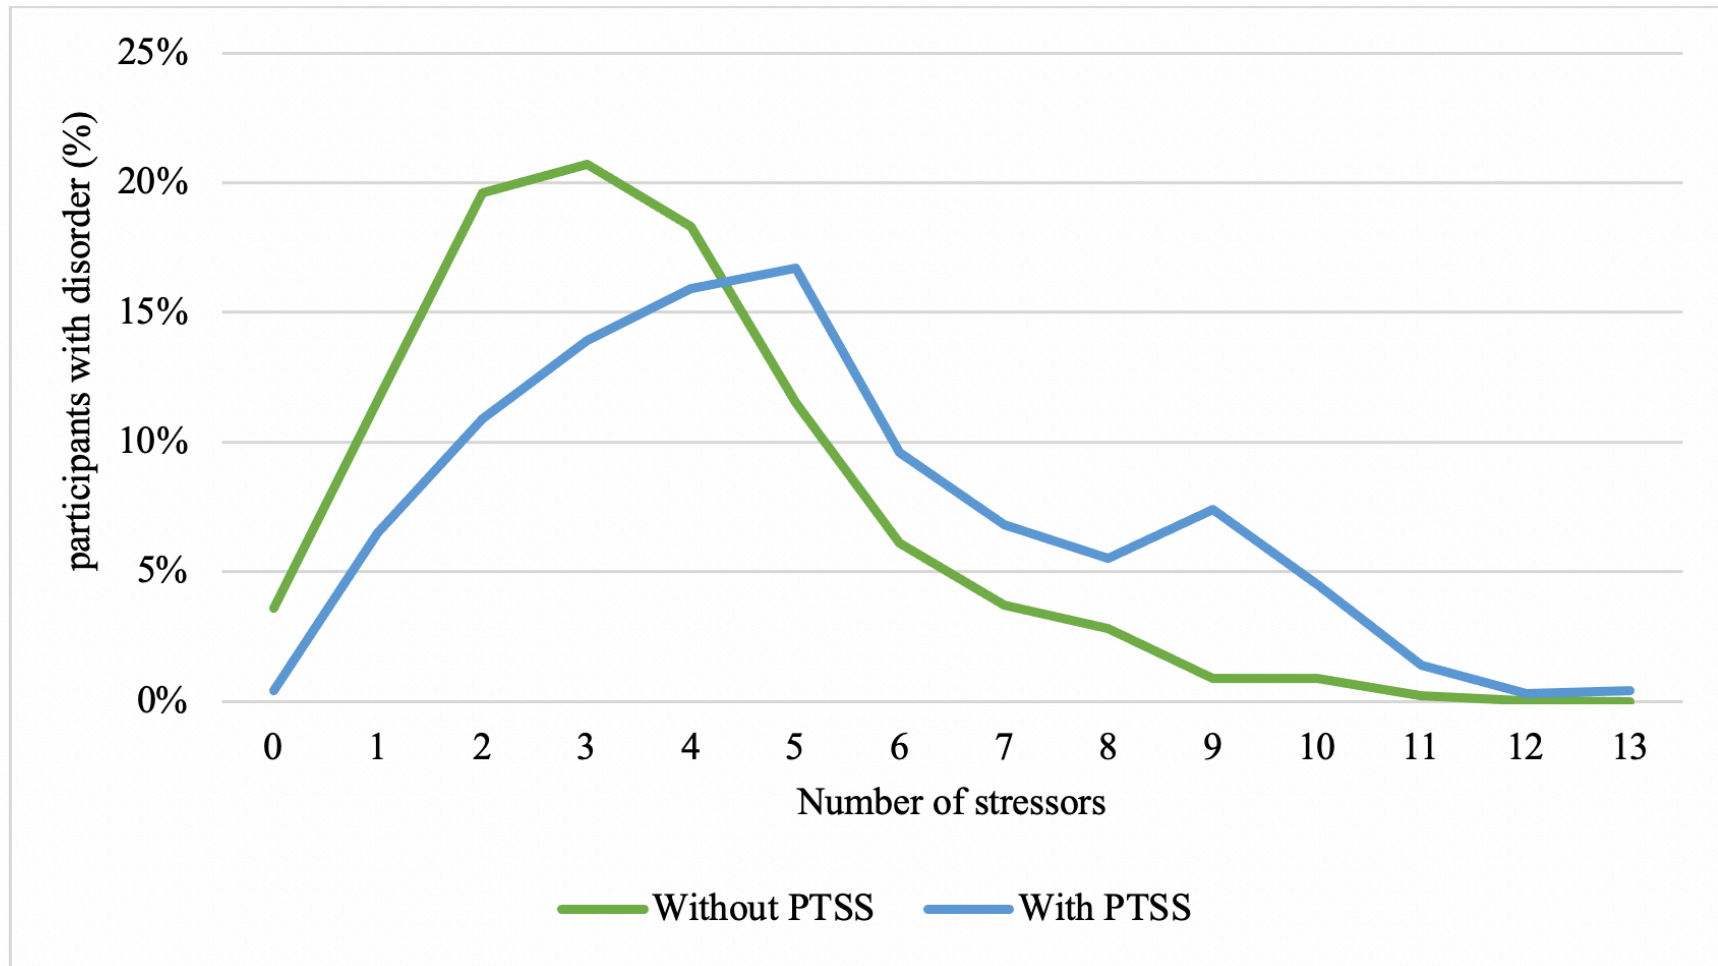

PTSS defined by a 4-item PTSD checklist (PCL) score  $\geq 3$ . Percentages are weighted to the U.S. population. This analysis is based on data from the COVID-19 and Life stressors Impact on Mental Health and Well-being Study (CLIMB).

**Appendix table 1: multivariable regression model of probable generalized anxiety disorder (GAD) and post-traumatic distress symptoms (PTSS) in adults 18 years and older in the U.S. by demographic characteristics and COVID-19 related stressors (continuous variable).**

|                                        | Probable GAD           |         | PTSS                   |         |
|----------------------------------------|------------------------|---------|------------------------|---------|
|                                        | Odds ratio<br>(95% CI) | P-value | Odds ratio<br>(95% CI) | P-value |
| <b>Gender</b>                          |                        |         |                        |         |
| Male                                   | ref                    |         | ref                    |         |
| Female                                 | 1.5<br>(1.0 – 2.4)     | 0.076   | 1.5<br>(1.0 – 2.1)     | 0.034   |
| <b>Age</b>                             |                        |         |                        |         |
| 18-39 y                                | ref                    |         | ref                    |         |
| 40-59 y                                | 0.6<br>(0.3 – 1.0)     | 0.047   | 1.1<br>(0.7 – 1.6)     | 0.805   |
| ≥60 y                                  | 0.50<br>(0.2 – 1.1)    | 0.100   | 0.6<br>(0.3 – 1.1)     | 0.082   |
| <b>Race</b>                            |                        |         |                        |         |
| Non-Hispanic White                     | ref                    |         | ref                    |         |
| Non-Hispanic Black                     | 0.8<br>(0.3 – 1.9)     | 0.583   | 0.7<br>(0.4 – 1.2)     | 0.163   |
| Hispanic                               | 0.7<br>(0.4 – 1.3)     | 0.229   | 1.0<br>(0.6 – 1.7)     | 0.882   |
| Non-Hispanic Asian                     | 0.1<br>(0.0 – 0.6)     | 0.017   | 0.3<br>(0.1 – 1.4)     | 0.126   |
| Other Race – Including<br>Multi-Racial | 1.0<br>(0.4 – 2.5)     | 0.971   | 0.5<br>(0.2 – 1.1)     | 0.084   |
| <b>Education</b>                       |                        |         |                        |         |
| No high school diploma                 | 1.1<br>(0.4 – 3.1)     | 0.860   | 0.7<br>(0.3 – 1.4)     | 0.288   |
| High school graduate or<br>equivalent  | 1.1<br>(0.5 – 2.2)     | 0.818   | 1.1<br>(0.7 – 1.8)     | 0.708   |
| Some college                           | 1.8<br>(1.0 – 3.1)     | 0.034   | 1.0<br>(0.6 – 1.4)     | 0.822   |
| College grad or more                   | ref                    |         | ref                    |         |
| <b>Marital status</b>                  |                        |         |                        |         |
| Married                                | ref                    |         | ref                    |         |
| Widowed, divorced, or<br>separated     | 1.3<br>(0.7 – 2.6)     | 0.424   | 1.1<br>(0.6 – 1.9)     | 0.758   |
| Never married                          | 1.3<br>(0.7 – 2.5)     | 0.402   | 1.1<br>(0.7 – 1.7)     | 0.753   |
| Living with partner                    | 1.4<br>(0.7 – 3.0)     | 0.322   | 0.9<br>(0.5 – 1.6)     | 0.777   |
| <b>Household income</b>                |                        |         |                        |         |
| \$0 - \$19,999                         | 0.9<br>(0.4 – 1.9)     | 0.767   | 1.2<br>(0.6 – 2.2)     | 0.652   |
| \$20,000 - \$44,999                    | 0.7<br>(0.3 – 1.4)     | 0.295   | 0.7<br>(0.4 – 1.2)     | 0.193   |



|                                |                    |        |                    |        |
|--------------------------------|--------------------|--------|--------------------|--------|
| \$45,000 - \$74,999            | 0.6<br>(0.3 – 1.2) | 0.162  | 0.9<br>(0.6 – 1.5) | 0.717  |
| ≥\$75,000                      | ref                |        | ref                |        |
| <b>Household savings</b>       |                    |        |                    |        |
| \$0 - \$4,999                  | 2.0<br>(1.2 – 3.2) | 0.008  | 1.3<br>(0.8 – 1.9) | 0.290  |
| ≥\$5,000                       |                    | ref    | ref                |        |
| <b>Household size</b>          | 1.0<br>(0.8 – 1.1) | 0.631  | 1.0<br>(0.9 – 1.1) | 0.962  |
| <b>COVID-related stressors</b> | 1.3<br>(1.2 – 1.4) | <0.001 | 1.3<br>(1.2 – 1.4) | <0.001 |

All percentages are weighted. Missing data: household income (n=33), household savings (n=45), and COVID-19 stressor score (n=3). GED is the general education diploma. GAD defined by a GAD-7 score ≥15. PTSS defined by a 4-item PTSD checklist (PCL) score ≥3.

**Appendix table 2: multivariable regression model of probable generalized anxiety disorder (GAD) and post-traumatic distress symptoms (PTSS) in adults 18 years and older in the U.S. by demographic characteristics and COVID-19 related economic and social stressors.**

|                                        | Probable GAD           |         | PTSS                   |         |
|----------------------------------------|------------------------|---------|------------------------|---------|
|                                        | Odds ratio<br>(95% CI) | P-value | Odds ratio<br>(95% CI) | P-value |
| <b>Gender</b>                          |                        |         |                        |         |
| Male                                   | ref                    |         | ref                    |         |
| Female                                 | 1.6<br>(1.0 – 2.5)     | 0.064   | 1.5<br>(1.0 – 2.6)     | 0.032   |
| <b>Age</b>                             |                        |         |                        |         |
| 18-39 y                                | ref                    |         | ref                    |         |
| 40-59 y                                | 0.6<br>(0.3 – 1.0)     | 0.043   | 1.0<br>(0.3 – 1.0)     | 0.818   |
| ≥60 y                                  | 0.5<br>(0.2 – 1.1)     | 0.105   | 0.6<br>(0.2 – 1.1)     | 0.084   |
| <b>Race</b>                            |                        |         |                        |         |
| Non-Hispanic White                     | ref                    |         | ref                    |         |
| Non-Hispanic Black                     | 0.8<br>(0.3 – 1.8)     | 0.581   | 0.6<br>(0.3 – 1.8)     | 0.162   |
| Hispanic                               | 0.7<br>(0.4 – 1.2)     | 0.180   | 1.0<br>(0.4 – 1.2)     | 0.900   |
| Non-Hispanic Asian                     | 0.1<br>(0.0 – 0.6)     | 0.016   | 0.3<br>(0.0 – 0.6)     | 0.120   |
| Other Race – Including<br>Multi-Racial | 1.0<br>(0.4 – 2.4)     | 0.937   | 0.5<br>(0.4 – 2.4)     | 0.084   |
| <b>Education</b>                       |                        |         |                        |         |
| No high school diploma                 | 1.1<br>(0.4 – 3.0)     | 0.907   | 0.6<br>(0.4 – 3.0)     | 0.278   |
| High school graduate or<br>equivalent  | 1.1<br>(0.5 – 2.1)     | 0.892   | 1.1<br>(0.5 – 2.1)     | 0.728   |
| Some college                           | 1.8<br>(1.0 – 3.0)     | 0.041   | 1.0<br>(1.0 – 3.0)     | 0.809   |
| College grad or more                   | ref                    |         | ref                    |         |
| <b>Marital status</b>                  |                        |         |                        |         |
| Married                                | ref                    |         | ref                    |         |
| Widowed, divorced, or<br>separated     | 1.3<br>(0.7 – 2.6)     | 0.416   | 1.1<br>(0.7 – 2.6)     | 0.755   |
| Never married                          | 1.3<br>(0.7 – 2.4)     | 0.420   | 1.1<br>(0.7 – 2.4)     | 0.764   |
| Living with partner                    | 1.4<br>(0.7 – 3.0)     | 0.327   | 0.9<br>(0.7 – 3.0)     | 0.772   |
| <b>Household income</b>                |                        |         |                        |         |
| \$0 - \$19,999                         | 0.9<br>(0.4 – 1.9)     | 0.738   | 1.2<br>(0.4 – 1.9)     | 0.668   |

|                                                     |                    |        |                    |        |
|-----------------------------------------------------|--------------------|--------|--------------------|--------|
| \$20,000 - \$44,999                                 | 0.7<br>(0.3 – 1.4) | 0.276  | 0.7<br>(0.3 – 1.4) | 0.195  |
| \$45,000 - \$74,999                                 | 0.6<br>(0.3 – 1.2) | 0.160  | 0.9<br>(0.3 – 1.2) | 0.713  |
| ≥\$75,000                                           | ref                |        | ref                |        |
| <b>Household savings</b>                            |                    |        |                    |        |
| \$0 - \$4,999                                       | 2.0<br>(1.2 – 3.2) | 0.008  | 1.3<br>(1.2 – 3.2) | 0.290  |
| ≥\$5,000                                            | ref                |        | ref                |        |
| <b>Household size</b>                               | 1.0<br>(0.8– 1.1)  | 0.627  | 1.0<br>(0.8– 1.1)  | 0.956  |
| <b>COVID-related financial stressors</b>            | 1.4<br>(1.2 – 1.6) | <0.001 | 1.3<br>(1.2 – 1.6) | <0.001 |
| <b>COVID-related social and emotional stressors</b> | 1.2<br>(1.1 – 1.5) | 0.011  | 1.3<br>(1.1 – 1.5) | <0.001 |

All percentages are weighted. Missing data: household income (n=33), household savings (n=45), and COVID-19 stressor score (n=3). GED is the general education diploma. GAD defined by a GAD-7 score  $\geq 15$ . PTSS defined by a 4-item PTSD checklist (PCL) score  $\geq 3$ . Financial stressors included losing a job, having difficulty paying rent, having financial problems, a member of your family losing a job, and having hours reduced at your job. Social and emotional stressors included feeling alone, having relationship problems, family or relationship problems, not being able to get food due to shortages, not being able to get supplies due to shortages, challenges finding childcare, not going to school, travel restrictions, seeing family less in person, and death of someone close to you due to COVID-19.

# BMJ Open

**The mental health consequences of COVID-19: a nationally representative cross-sectional study of pandemic-related stressors and anxiety disorders in the United States.**

|                                 |                                                                                                                                                                                                                                                                                                                                |
|---------------------------------|--------------------------------------------------------------------------------------------------------------------------------------------------------------------------------------------------------------------------------------------------------------------------------------------------------------------------------|
| Journal:                        | <i>BMJ Open</i>                                                                                                                                                                                                                                                                                                                |
| Manuscript ID                   | bmjopen-2020-044125.R2                                                                                                                                                                                                                                                                                                         |
| Article Type:                   | Original research                                                                                                                                                                                                                                                                                                              |
| Date Submitted by the Author:   | 17-Mar-2021                                                                                                                                                                                                                                                                                                                    |
| Complete List of Authors:       | Abdalla, Salma; Boston University School of Public Health, Epidemiology<br>Ettman, Catherine; Boston University School of Public Health, ; Brown<br>University School of Public Health,<br>Cohen, Gregory; Boston University School of Public Health, Epidemiology<br>Galea, Sandro; Boston University School of Public Health |
| <b>Primary Subject Heading</b>: | Mental health                                                                                                                                                                                                                                                                                                                  |
| Secondary Subject Heading:      | Public health, Epidemiology                                                                                                                                                                                                                                                                                                    |
| Keywords:                       | MENTAL HEALTH, COVID-19, Anxiety disorders < PSYCHIATRY                                                                                                                                                                                                                                                                        |
|                                 |                                                                                                                                                                                                                                                                                                                                |

SCHOLARONE™  
Manuscripts



I, the Submitting Author has the right to grant and does grant on behalf of all authors of the Work (as defined in the below author licence), an exclusive licence and/or a non-exclusive licence for contributions from authors who are: i) UK Crown employees; ii) where BMJ has agreed a CC-BY licence shall apply, and/or iii) in accordance with the terms applicable for US Federal Government officers or employees acting as part of their official duties; on a worldwide, perpetual, irrevocable, royalty-free basis to BMJ Publishing Group Ltd ("BMJ") its licensees and where the relevant Journal is co-owned by BMJ to the co-owners of the Journal, to publish the Work in this journal and any other BMJ products and to exploit all rights, as set out in our [licence](#).

The Submitting Author accepts and understands that any supply made under these terms is made by BMJ to the Submitting Author unless you are acting as an employee on behalf of your employer or a postgraduate student of an affiliated institution which is paying any applicable article publishing charge ("APC") for Open Access articles. Where the Submitting Author wishes to make the Work available on an Open Access basis (and intends to pay the relevant APC), the terms of reuse of such Open Access shall be governed by a Creative Commons licence – details of these licences and which [Creative Commons](#) licence will apply to this Work are set out in our licence referred to above.

Other than as permitted in any relevant BMJ Author's Self Archiving Policies, I confirm this Work has not been accepted for publication elsewhere, is not being considered for publication elsewhere and does not duplicate material already published. I confirm all authors consent to publication of this Work and authorise the granting of this licence.

1  
2  
3 **The mental health consequences of COVID-19: a nationally representative cross-sectional study of**  
4  
5 **pandemic-related stressors and anxiety disorders in the United States.**  
6

7 Salma M Abdalla<sup>1</sup>, Catherine K Ettman<sup>1,2</sup>, Gregory H Cohen<sup>1,3</sup>, Sandro Galea<sup>1</sup>  
8

9 <sup>1</sup> Boston University School of Public Health, Boston, MA, USA

10 <sup>2</sup> Brown University School of Public Health, Providence, RI, USA

11 <sup>3</sup> Columbia Mailman School of Public Health, NYC, NY, USA  
12  
13  
14  
15

16 **Corresponding author**

17 Salma M Abdalla

18 Department of Epidemiology

19 Boston University School of Public Health

20 Boston, Massachusetts, 02119, USA

21 **Telephone:** +16173583407

22 **Email:** [abdallas@bu.edu](mailto:abdallas@bu.edu)  
23  
24  
25  
26

27 **Word Count:** 2712

28 **Keywords:** COVID-19, mental health, anxiety, generalized anxiety disorder, post-traumatic stress  
29 symptoms, economic stressors  
30  
31  
32  
33  
34  
35  
36  
37  
38  
39  
40  
41  
42  
43  
44  
45  
46  
47  
48  
49  
50  
51  
52  
53  
54  
55  
56  
57  
58  
59  
60

## **Abstract**

**Objective:** to document the prevalence of probable anxiety disorders in the United States during the COVID-19 pandemic.

**Design:** cross-sectional analysis

**Setting:** a nationally representative sample in the United States between March 31 and April 13, 2020

**Participants:** 1450 English-speaking adult participants in the AmeriSpeak Panel. AmeriSpeak is a probability-based panel designed to be representative of households in the United States.

**Main outcome measures:** prevalence of probable generalized anxiety disorder (GAD) using the GAD-7 and post-traumatic stress symptoms (PTSS) using the 4-items PTSD checklist (PCL). Both outcomes were adjusted for demographics and COVID-19 related stressors.

**Results:** The majority of participants were female (51.8%), non-Hispanic white (62.9%), and reported a household saving of \$5000 or more. Those between 18-29 years old were the largest age group (38.1%) compared to 40-59 years (32.0%) and 60 years or more (29.9%). The prevalence of probable GAD was 10.9% (95% CI: 9.1-13.2) and the prevalence of PTSS was 21.7% (95% CI: 19.1-24.6). Among participants reporting five or more COVID-19 related stressors, the prevalence of probable GAD was 20.5% (95% CI: 16.1-25.8) and the prevalence of PTSS was 35.7% (95% CI: 30.2-41.6). Reporting five or more COVID-19 related stressors was a predictor of both probable GAD (OR=4.5, 95% CI: 2.3-8.8) and PTSS (OR=3.3, 95% CI: 2.1-5.2).

**Conclusions:** The prevalence of probable anxiety disorders in the United States, as the COVID-19 pandemic and policies implemented to tackle it unfolded, is higher than estimates reported prior to the pandemic and estimates reported following other mass traumatic events. Exposure to COVID-19 related stressors is associated with higher prevalence of both probable GAD and PTSS, highlighting the role these stressors play in increasing the risk of developing of anxiety disorders in the United States. Mitigation policies should take into account the effect of pandemic-related stressors on the mental health of the population.

### **Strengths and limitations of this study**

- This analysis uses a nationally representative sample examining the risk of developing of anxiety disorders in the United States.
- The study was conducted within a short duration following the implementation of state-wide policies to tackle the COVID-19 pandemic and includes questions about a wide-range of social and economic COVID-19 related stressors.
- To assess the risk of developing of anxiety disorders, the study uses screening, rather than diagnostic tools. However, these screening tools have been validated extensively for assessment of anxiety disorders in general populations.
- The use of a pre-selected panel of participants can lead to selection bias.



## **Introduction**

The effect of the COVID-19 pandemic on the American public has been profound. More than 600,000 people have died from COVID-19 in the United States, and a number of unprecedented physical distancing policies, continue to be in place to limit the spread of the pandemic. These policies changed daily life for most people in the United States significantly and continue to have large scale social and economic consequences. The physical toll of COVID-19, coupled with the ubiquity and severity of these policies, distinguish the pandemic as a mass traumatic event, one that is associated with extensive loss of lives and financial strains that can lead to severe and lasting psychological consequences, anxiety disorders in particular.<sup>1-4</sup>

Uncertainty, fear, economic and social costs, and disruptions to daily life all contribute to a high prevalence of anxiety disorders following mass traumatic events.<sup>5,6</sup> For example, a study assessing the mental health consequences of the Ebola epidemic in Sierra Leone found that, a year following the epidemic, 6% of participants reached the threshold for a combined anxiety-depression measure and 27% reached the threshold for post-traumatic stress disorder (PTSD).<sup>7</sup> Another study estimated that, following Hurricane Katrina, the 30-day prevalence of PTSD was 30.3% among residents of the New Orleans metropolitan area, which was severely affected by the hurricane.<sup>8</sup> This previous work suggests that the COVID-19 pandemic will have a substantial impact on the prevalence of anxiety disorders in the United States. Early evidence has found that COVID-19 pandemic is associated with adverse mental health consequences.<sup>9-17</sup> However, to our knowledge, the association between COVID-19 and related stressors—both due to the pandemic and policies implemented to halt its spread—on the risk of developing of anxiety disorders in the United States has yet to be fully documented.

We assessed the prevalence of anxiety disorders, specifically probable generalized anxiety disorder (GAD) and post-traumatic stress symptoms (PTSS), as the COVID-19 pandemic unfolded in the United States. We also assessed the association between COVID-19 related stressors and the risk of developing

1  
2  
3 anxiety disorders following the implementation of wide-spread physical distancing policies in the United  
4  
5 States.

## 6 7 **Methods**

### 8 9 **Data collection and sample**

10  
11 This analysis was based on data from our COVID-19 and Life stressors Impact on Mental Health and  
12  
13 Well-being Study (CLIMB). We collected nationally representative data using a random sample of adult  
14  
15 participants in the AmeriSpeak Panel between March 31 and April 13, 2020. AmeriSpeak is a probability-  
16  
17 based panel designed to be representative of households in the United States. The panel is funded and  
18  
19 operated by the National Opinion Research Center (NORC) at the University of Chicago and their  
20  
21 sampling frame covers approximately 97% of households in the country. The survey was offered to  
22  
23 English-speaking participants who had completed an AmeriSpeak survey in the last 6 months.

24  
25 In total, 1470 participants completed the survey, 1385 online and 85 via the phone, representing 64.3% of  
26  
27 invited panelists. From those 1470 participants, 20 had missing data on either GAD or PTSS questions,  
28  
29 which were removed; the final analysis included 1450 participants from the CLIMB study. The  
30  
31 institutional review boards of NORC and Boston University Medical Campus (H-39986) approved the  
32  
33 study. NORC obtained written consent from study participants when they first enrolled in the  
34  
35 AmeriSpeak Panel.  
36  
37

### 38 39 **Exposure variables**

40  
41 Our structured survey included questions on demographic characteristics (sex, age, race and ethnicity,  
42  
43 education, marital status, household income, household savings, and household size) and whether the  
44  
45 respondent had or knew anyone who had COVID-19. The primary exposure of interest was reporting  
46  
47 COVID-19 related stressors. The stressor list was based on prior analyses following traumatic events.<sup>13,18</sup>  
48  
49 The list included financial stressors (e.g., losing a job, having difficulty paying rent, having financial  
50  
51 problems, a member of your family losing a job, and having hours reduced at your job) and social and  
52  
53 emotional stressors (e.g., feeling alone, having relationship problems, family or relationship problems,  
54  
55 not being able to get food due to shortages, not being able to get supplies due to shortages, challenges  
56  
57  
58  
59

1  
2  
3 finding childcare, not going to school, travel restrictions, seeing family less in person, and death of  
4 someone close to you due to COVID-19). We excluded stressors that were applicable to only a subset of  
5 the population, ultimately including 14 stressors in our analysis. We then created a cumulative stressor  
6 score and divided the score into three stressor categories, low (0-2 stressors), medium (3-4 stressors), and  
7 high (5-14 stressors). The score reflects the symptoms distribution in the sample with approximately one  
8 third of the sample in each category.  
9  
10  
11  
12  
13  
14

### 15 **Outcome variables**

16 For psychological assessment, we used two validated anxiety disorders questionnaires. We used the  
17 GAD-7 to assess GAD. The cutoff for probable GAD in our analysis was a score of 15 or more. This  
18 cutoff was based on the recommended cutoffs for GAD-7 to screen for GAD.<sup>19</sup> We also conducted a  
19 sensitivity analysis with a cutoff score of 10 or more. We used the 4-items PTSD checklist (PCL) to  
20 screen for PTSS. The cutoff for PTSS was three score or more.<sup>20</sup>  
21  
22  
23  
24  
25  
26  
27

### 28 **Statistical analysis**

29 We used STATA 16.1 to conduct the analysis for this study. All analyses were weighted using complex  
30 survey weights to adjust for sample selection and post-stratification. We calculated the overall prevalence  
31 of probable GAD and PTSS and the prevalence of each outcome stratified by number of stressors. We  
32 then conducted a bivariable analysis comparing probable GAD and PTSS prevalence across demographic  
33 characteristics, stressor score, and each type of stressor using a two-tailed chi-square test. We used  
34 complete case analysis for the multivariable logistic regression models to estimate the odds ratios of the  
35 association between COVID-19 related stressor score and probable GAD and PTSS when controlling for  
36 gender, age, race, education, marital status, household income, household savings, and household size.  
37 We also constructed other multivariable logistic regression models with the number of stressors as a  
38 continuous variable and other models that divide the stressors into two continuous variables (financial  
39 stressors and social stressors) as sensitivity analyses. We followed the Strengthening the  
40 Reporting of Observational Studies in Epidemiology (STROBE) reporting  
41  
42  
43  
44  
45  
46  
47  
48  
49  
50  
51  
52  
53  
54  
55  
56  
57  
58  
59  
60

1  
2  
3 guideline for cross-sectional studies when designing and reporting on  
4  
5 this analysis.  
6

### 7 **Patient and public involvement**

8  
9 Patients and the public were not involved in the developing the research question, design, or  
10  
11 implementation of this analysis. This is primarily because we did not have funding to support such  
12  
13 involvement and our analysis was on a national level using validated assessment tools.  
14

### 15 **Results**

16  
17 Of the 1450 participants, 10.9% (95% CI: 9.1, 13.2) reached the threshold for probable GAD, using a  
18  
19 score of 15 as a cutoff. When using a score of 10 as a cutoff point, 25% (95% CI: 22.2-28.0) reached the  
20  
21 threshold for probable GAD. In terms of PTSS, 21.7% (95% CI: 19.1-24.6) reached the threshold.  
22

23  
24 Table 1 shows the association between demographic characteristics and the two outcomes. In particular,  
25  
26 female sex was associated with a higher prevalence of both probable GAD and PTSS in the bivariable  
27  
28 analysis. The prevalence of probable GAD was 14.1% (95% CI: 11.2-17.6) among females compared to  
29  
30 7.6% (95% CI: 5.4-10.4) among males. The prevalence of probable PTSS was 26.1% (95% CI: 22.3-30.2)  
31  
32 among females compared to 17% (95% CI: 13.5-21.2) among males. Other demographic variables  
33  
34 associated with both outcomes in the bivariable analysis were age and household savings. In the  
35  
36 multivariable analysis, reporting household savings of less than \$5,000 was a predictor of GAD (OR= 1.9,  
37  
38 95% CI: 1.2 – 3.1).  
39

### 40 **COVID-19 related stressors and anxiety disorders**

41  
42 Higher stressor score was positively associated with, and a predictor of, both probable GAD and PTSS.  
43  
44 The prevalence of probable GAD was 4% (95% CI: 2.2-7.0) among participants with low stressor score,  
45  
46 8.6% (95% CI: 6.2-11.8) among participants with medium stressor score, and 20.5% (95% CI: 16.1-25.8)  
47  
48 among participants with high stressor score. High stressor score was a predictor of probable GAD  
49  
50 (OR=4.5, 95% CI: 2.3-8.8) compared to reporting a low stressor score. Including COVID-19 related  
51  
52 stressors as a continuous variable in the multivariable model produced consistent results (OR=1.3, 95%  
53  
54 CI: 1.2-1.4) (Appendix Table 1). Dividing COVID-19 related stressors into two continuous variables  
55  
56  
57  
58  
59  
60

1  
2  
3 depending on the nature of the stressor in the multivariable model produced consistent results for  
4 financial stressors (OR=1.4, 95% CI: 1.2-1.6), and social and emotional stressors (OR=1.2, 95% CI: 1.1-  
5 1.5) (Appendix Table 2).  
6  
7

8  
9 The prevalence of PTSS was 12.4% (95% CI: 8.9-17.0) among participants with low stressor score,  
10 17.4% (95% CI: 13.6-22.0) among participants with medium stressor score, and 35.7% (95% CI: 30.2-  
11 41.6) among participants with high stressor score. Reporting a high stressor score, compared to a low  
12 stressor score, was a predictor of PTSS (OR=3.3, 95% CI: 2.1-5.2) (Table 1). Including COVID-19  
13 related stressors as a continuous variable in the multivariable model produced consistent results (OR=1.3,  
14 95% CI: 1.2-1.4) (appendix table 1). Dividing COVID-19 related stressors into two continuous variables  
15 the multivariable model depending on the nature of the stressor produced consistent results for financial  
16 stressors (OR=1.3, 95% CI: 1.2-1.6), and social and emotional stressors (OR=1.3, 95% CI: 1.1-1.5)  
17 (Appendix Table 2).  
18  
19  
20  
21  
22  
23  
24  
25  
26  
27  
28  
29

30  
31 Figure 1 shows that reporting any COVID-19 related stressor, except for experiencing travel restrictions,  
32 was associated with higher probable GAD prevalence. The greatest difference in probable GAD  
33 prevalence by COVID-19 related stressor was between participants who reported having family or  
34 relationship problems (prevalence=27%, 95% CI: 19.6-36.1) compared to participants who did not report  
35 family or relationship problems (prevalence=8.7%, 95% CI: 6.9-10.9). Other stressors leading to a  
36 significant difference in probable GAD prevalence included feeling lonely, having difficulty paying the  
37 rent, losing a job, having financial problems, and a household member losing a job. Figure 2 shows that  
38 participants who reached the threshold for probable GAD reported, on average, experiencing a higher  
39 number of stressors compared to participants who did not reach the threshold for probable GAD.  
40  
41  
42  
43  
44  
45  
46  
47  
48

49  
50 Figure 3 shows that reporting any COVID-19 related stressor was associated with higher PTSS  
51 prevalence. The greatest significant difference in PTSS prevalence was between participants who reported  
52 having financial problems (prevalence=37.2%, 95% CI: 31.1-43.7) compared to participants who did not  
53 report having financial problems (prevalence=15.8%, 95% CI: 13.2-18.8). Other stressors leading to a  
54  
55  
56  
57  
58  
59

1  
2  
3 significant difference in PTSS prevalence included feeling along, losing a job, and having difficulty  
4 paying the rent. Figure 4 shows that participants who reached the threshold for PTSS reported, on  
5 average, experienced a higher number of stressors compared to participants who did not reach the  
6 threshold for PTSS.  
7  
8  
9  
10

## 11 **Discussion**

12  
13 In a survey of a representative sample of adults in the United States conducted between March 31 and  
14 April 13, 2020, 10.9% of adults reported a score indicative of probable GAD and 21% reported PTSS.  
15  
16 These numbers are significantly higher than the expected prevalence of anxiety disorders in the United  
17 States. For example, the National Comorbidity Survey replication estimated that the prevalence of GAD  
18 and PTSD in the United States were 3.1% and 3.5%, respectively (collected before COVID-19).<sup>21</sup>  
19  
20 Another analysis showed that the 12-month prevalence of GAD in United States in 2017 was 4%.<sup>22</sup>  
21  
22 However, our results are lower than a recent analysis by Twenge and Joiner, which found that, compared  
23 to 2019, adults in the United States were more than three times as likely to screen positive for anxiety  
24 (using GAD-2) between April 23-May 2020. The study reports that on the week of May 21, 2020 29.4%  
25 of participants screened positive for GAD.<sup>14</sup> The difference in results can potentially be due to the higher  
26 threshold for screening positive for probable GAD by our screening tool.  
27  
28  
29  
30  
31  
32  
33  
34  
35

36 We also found that COVID-19 related stressors were associated with participants reporting more  
37 symptoms of GAD or PTSS. The prevalence of GAD was four times higher among participants reporting  
38 five or more stressors compared to participants reporting two or fewer stressors. The prevalence of PTSS  
39 was about three times higher among participants reporting five or more stressors compared to participants  
40 reporting two or fewer COVID-19 related stressors. This reinforces the hypothesis that COVID-19  
41 behaves like a mass traumatic event, wherein experiences related to COVID-19 and its consequences are  
42 directly linked to adverse mental health consequences. These results are consistent with other  
43 epidemiologic analyses that studied COVID-19 stressors and mental health. For example, Fitzpatrick et  
44 al. found in a nationally representative sample that fear of COVID-19 was linked to both depression and  
45 anxiety, and that more than 25% of participants reported moderate to severe anxiety symptoms, which  
46  
47  
48  
49  
50  
51  
52  
53  
54  
55  
56  
57  
58  
59  
60

1  
2  
3 may warrant clinical treatment.<sup>23</sup> Another study found that between April 13 and May 19, 2020, young  
4 adults (18-20 years) reported high levels of GAD (45.4% with a 10 score cutoff) and PTSD symptoms  
5 (31.8% with a 45 PCL-C score cutoff).<sup>12,23</sup> Conditions associated with anxiety disorders often also lead to  
6 depression.<sup>24</sup> This is consistent with our analysis that found that the prevalence of depression symptoms  
7 has risen during the study period as well.<sup>25</sup>

8  
9  
10  
11  
12  
13 Our study is consistent with existing literature showing higher prevalence of anxiety disorders following  
14 mass traumatic events, even if our results suggest the severity of anxiety disorders due to the COVID-19  
15 pandemic is greater than that previously recorded after other mass traumas.<sup>1</sup> Agyapong et al. reported that  
16 the prevalence of GAD after one month following a wildfire—which physically, emotionally, and  
17 economically affected the community—was 19.8%.<sup>26</sup> Their results were based on using a score of 10  
18 points on the GAD-7 scale as the cutoff. Using the same cutoff, the prevalence of probable GAD in our  
19 analysis rises to 25%. Silver et al. found that 17% of the United States population that lives outside New  
20 York city reported PTSS two months after the September 11 terrorist attack.<sup>27</sup>

21  
22  
23  
24  
25  
26  
27  
28  
29  
30  
31 Our study complements studies from China showing that COVID-19 has led to adverse psychological  
32 consequences.<sup>9,28</sup> We add to the literature by quantifying the probable prevalence of GAD and PTSS as  
33 the COVID-19 pandemic unfolded in the United States. Our results also support analysis from Nelson et  
34 al. showing the widespread concerns and stressors due to COVID-19 in the United States.<sup>10</sup> Our work  
35 both describes the experience of particular stressors and quantifies their contribution to the risk of  
36 developing of anxiety disorders in the country. In particular, we show that financial (e.g., having  
37 difficulty paying rent) and social and emotional (e.g., feeling lonely) stressors contribute to higher rates of  
38 both probable GAD and PTSS, which aligns with existing literature.<sup>6</sup>

39  
40  
41  
42  
43  
44  
45  
46  
47  
48  
49  
50  
51  
52  
53  
54  
55  
56  
57  
58  
59  
60  
These results should be considered with the following limitations in mind. First, our study uses screeners  
for GAD and PTSS. A definitive diagnosis of either will require clinical assessment. As such, these  
results should be confirmed in a representative sample using diagnostic tools. However, both screening  
questionnaires in our analysis are validated tools used extensively to assess the prevalence of GAD and  
PTSS in the population.<sup>19,20</sup> Second, the use of a pre-specified panel can lead to selection bias. However,

1  
2  
3 the AmeriSpeak Panel has been used reliably for years to provide representative samples of the United  
4 States.<sup>29</sup> Third, there are a large number of other covariates—including features of context like, for  
5  
6  
7 example, estimates of pandemic severity—that could be considered to more fully assess the determinants  
8  
9  
10 of anxiety disorders in this study. This is beyond the scope of the paper but potentially a fruitful direction  
11  
12 for future work. Fourth, our post-only design, which does not allow for information on the mental health  
13  
14 status of the participants prior to the pandemic, suggests that we cannot causally link the pandemic, and  
15  
16 the policies implemented to tackle it, to a subsequent increased risk of developing of anxiety disorders.  
17  
18 However, the specificity of stressors reported, and the high risk of developing of reported anxiety  
19  
20 disorders, consistent with previous knowledge and expectation, strongly suggest that we are observing  
21  
22 reliable associations that can be further examined in subsequent longitudinal work.  
23

## 24 **Conclusion**

25  
26 The prevalence of anxiety disorders as the COVID-19 pandemic unfolded in the United States is  
27  
28 substantially higher than the expected baseline prevalence in the United States and of the burden reported  
29  
30 following other mass traumatic events. This potentially reflects the scale of the pandemic, the ubiquity of  
31  
32 the impact of the policies implemented to tackle it, and the economic and social consequences of both.  
33  
34 Persons experiencing COVID-19 related stressors, particularly financial, and social and emotional  
35  
36 stressors, were more likely to report both probable GAD and PTSS indicating the critical role these  
37  
38 stressors are play in increasing the risk of developing of anxiety disorders in the United States. COVID-  
39  
40 19 mitigation policies should take into account the effect of pandemic-related stressors on the mental  
41  
42 health of the United States population.  
43  
44  
45  
46  
47  
48  
49  
50  
51  
52  
53  
54  
55  
56  
57  
58  
59  
60



1  
2  
3 **Contributors:** CKE and SMA developed the first draft of the survey. SG reviewed the survey. SMA  
4 conducted the data analysis and wrote the manuscript draft. CKE, GHC, and SG contributed to study  
5 conception and manuscript drafting. All authors acknowledge full responsibility for the analyses and  
6 interpretation of the report. The corresponding author attests that all listed authors meet authorship criteria  
7 and that no others meeting the criteria have been omitted.  
8  
9

10  
11  
12 **Funding:** The research was funded by the Rockefeller Foundation-Boston University 3-D Commission  
13 (grant number 2019 HTH 024). The Rockefeller Foundation had no role in the design and conduct of the  
14 study; collection, management, analysis, and interpretation of the data; preparation, review, or approval of  
15 the manuscript; or the decision to submit the manuscript for publication.  
16  
17

18 **Competing interests:** All authors have completed the ICMJE uniform disclosure form at  
19 [http://www.icmje.org/coi\\_disclosure.pdf](http://www.icmje.org/coi_disclosure.pdf) and declare: support from the Rockefeller Foundation-Boston  
20 University 3-D Commission; no financial relationships with any organisation that might have an interest  
21 in the submitted work in the previous three years; no other relationships or activities that could appear to  
22 have influenced the submitted work.  
23  
24

25 **Patient consent for publication:** Not required.  
26  
27

28 **Ethics approval:** The institutional review boards of NORC and Boston University Medical Campus (H-  
29 39986) approved the study. NORC obtained written consent from study participants when they first  
30 enrolled in the AmeriSpeak Panel.  
31  
32

33 **Data sharing:** authors may share the data upon reasonable requests  
34  
35

36 **Transparency statement:** The lead authors affirm that the manuscript is an honest, accurate, and  
37 transparent account of the study being reported; that no important aspects of the study have been omitted;  
38 and that any discrepancies from the study as planned (and, if relevant, registered) have been explained.  
39  
40

41 **Dissemination to participants and related patient and public communities:** There are no immediate  
42 plans to directly disseminate the analysis results to directly to the participants o as this study analyzed  
43 deidentified data. However, we aim to widely disseminate the results through our institution website and  
44 social media outlets to reach the public.  
45  
46  
47  
48  
49  
50  
51  
52  
53  
54  
55  
56  
57  
58  
59  
60

**Figure caption**

Figure 1: Prevalence of probable generalized anxiety disorder (GAD) for persons reporting different COVID-19 stressors

Figure 2: Distribution of number of stressors among participants depending on whether they reported symptoms consistent with probable generalized anxiety disorder (GAD) status

Figure 3: Prevalence of Post-traumatic stress symptoms (PTSS) for persons reporting different COVID-19 stressors

Figure 4: Distribution of number of stressors among participants depending on whether they reach the cut-off for post-traumatic stress symptoms (PTSS) status

For peer review only

## References

1. Goldmann E, Galea S. Mental Health Consequences of Disasters. *Annu Rev Public Health*. 2014;35(1):169-183. doi:10.1146/annurev-publhealth-032013-182435
2. Ni MY, Kim Y, McDowell I, et al. Mental health during and after protests, riots and revolutions: A systematic review. *Aust N Z J Psychiatry*. 2020;54(3):232-243. doi:10.1177/0004867419899165
3. Peng EYC, Lee MB, Tsai ST, et al. Population-based post-crisis psychological distress: An example from the SARS outbreak in Taiwan. *J Formos Med Assoc*. 2010;109(7):524-532. doi:10.1016/S0929-6646(10)60087-3
4. David D, Mellman TA, Mendoza LM, Kulick-Bell R, Ironson G, Schneiderman N. Psychiatric morbidity following Hurricane Andrew. *J Trauma Stress*. 1996;9(3):607-612. doi:10.1007/BF02103669
5. Jeong H, Yim HW, Song YJ, et al. Mental health status of people isolated due to Middle East Respiratory Syndrome. *Epidemiol Health*. 2016;38:e2016048. doi:10.4178/epih.e2016048
6. Viseu J, Leal R, de Jesus SN, Pinto P, Pechorro P, Greenglass E. Relationship between economic stress factors and stress, anxiety, and depression: Moderating role of social support. *Psychiatry Res*. 2018;268:102-107. doi:10.1016/j.psychres.2018.07.008
7. Jalloh MF, Li W, Bunnell RE, et al. Impact of Ebola experiences and risk perceptions on mental health in Sierra Leone, July 2015. *BMJ Glob Heal*. 2018;3(2):e000471. doi:10.1136/bmjgh-2017-000471
8. Galea S, Brewin CR, Gruber M, et al. Exposure to hurricane-related stressors and mental illness after Hurricane Katrina. *Arch Gen Psychiatry*. 2007;64(12):1427-1434. doi:10.1001/archpsyc.64.12.1427
9. Cao W, Fang Z, Hou G, et al. The psychological impact of the COVID-19 epidemic on college students in China. *Psychiatry Res*. 2020;287. doi:10.1016/j.psychres.2020.112934
10. Nelson LM, Simard JF, Oluyomi A, et al. US Public Concerns about the COVID-19 Pandemic from Results of a Survey Given via Social Media. *JAMA Intern Med*. 2020.

- 1  
2  
3 doi:10.1001/jamainternmed.2020.1369  
4  
5  
6 11. Wang C, Pan R, Wan X, et al. Immediate psychological responses and associated factors during  
7 the initial stage of the 2019 coronavirus disease (COVID-19) epidemic among the general  
8 population in China. *Int J Environ Res Public Health*. 2020;17(5). doi:10.3390/ijerph17051729  
9  
10  
11 12. Liu CH, Zhang E, Wong GTF, Hyun S, Hahm H “Chris.” Factors associated with depression,  
12 anxiety, and PTSD symptomatology during the COVID-19 pandemic: Clinical implications for  
13 U.S. young adult mental health. *Psychiatry Res*. 2020;290:113172.  
14  
15 doi:10.1016/j.psychres.2020.113172  
16  
17  
18 13. Boardman JD, Finch BK, Ellison CG, Williams DR, Jackson JS. Neighborhood disadvantage,  
19 stress, and drug use among adults. *J Health Soc Behav*. 2001;42(2):151-165. doi:10.2307/3090175  
20  
21  
22 14. Twenge JM, Joiner TE. U.S. Census Bureau-assessed prevalence of anxiety and depressive  
23 symptoms in 2019 and during the 2020 COVID-19 pandemic. *Depress Anxiety*. 2020;37(10):954-  
24 956. doi:10.1002/da.23077  
25  
26  
27 15. Salari N, Khazaie H, Hosseini-Far A, et al. The prevalence of stress, anxiety and depression  
28 within front-line healthcare workers caring for COVID-19 patients: a systematic review and meta-  
29 regression. *Hum Resour Health*. 2020;18(1):100. doi:10.1186/s12960-020-00544-1  
30  
31  
32 16. Lasheras I, Gracia-García P, Lipnicki DM, et al. Prevalence of anxiety in medical students during  
33 the covid-19 pandemic: A rapid systematic review with meta-analysis. *Int J Environ Res Public*  
34 *Health*. 2020;17(18):1-12. doi:10.3390/ijerph17186603  
35  
36  
37 17. Salari N, Hosseini-Far A, Jalali R, et al. Prevalence of stress, anxiety, depression among the  
38 general population during the COVID-19 pandemic: A systematic review and meta-analysis.  
39 *Global Health*. 2020;16(1):57. doi:10.1186/s12992-020-00589-w  
40  
41  
42 18. Galea S, Tracy M, Norris F, Coffey SF. Financial and social circumstances and the incidence and  
43 course of PTSD in Mississippi during the first two years after Hurricane Katrina. *J Trauma Stress*.  
44 2008;21(4):357-368. doi:10.1002/jts.20355  
45  
46  
47 19. Spitzer RL, Kroenke K, Williams JBW, Löwe B. A brief measure for assessing generalized  
48  
49  
50  
51  
52  
53  
54  
55  
56  
57  
58  
59  
60

- 1  
2  
3 anxiety disorder: The GAD-7. *Arch Intern Med*. 2006;166(10):1092-1097.  
4  
5 doi:10.1001/archinte.166.10.1092  
6
- 7 20. Bliese PD, Wright KM, Adler AB, Cabrera O, Castro CA, Hoge CW. Validating the Primary Care  
8 Posttraumatic Stress Disorder Screen and the Posttraumatic Stress Disorder Checklist With  
9 Soldiers Returning From Combat. *J Consult Clin Psychol*. 2008;76(2):272-281. doi:10.1037/0022-  
10 006X.76.2.272  
11  
12  
13  
14  
15
- 16 21. Kessler RC, Wai TC, Demler O, Walters EE. Prevalence, severity, and comorbidity of 12-month  
17 DSM-IV disorders in the National Comorbidity Survey Replication. *Arch Gen Psychiatry*.  
18 2005;62(6):617-627. doi:10.1001/archpsyc.62.6.617  
19  
20  
21
- 22 22. Ruscio AM, Hallion LS, Lim CCW, et al. Cross-sectional comparison of the epidemiology of  
23 DSM-5 generalized anxiety disorder across the globe. *JAMA Psychiatry*. 2017;74(5):465-475.  
24  
25  
26  
27  
28
- 29 23. Fitzpatrick KM, Harris C, Drawve G. Fear of COVID-19 and the Mental Health Consequences in  
30 America. *Psychol Trauma Theory, Res Pract Policy*. 2020;12(S1). doi:10.1037/tra0000924  
31  
32
- 33 24. Bueno-Notivol J, Gracia-García P, Olaya B, Lasheras I, López-Antón R, Santabárbara J.  
34 Prevalence of depression during the COVID-19 outbreak: A meta-analysis of community-based  
35 studies. *Int J Clin Heal Psychol*. 2021;21(1):100196. doi:10.1016/j.ijchp.2020.07.007  
36  
37  
38
- 39 25. Ettman CK, Abdalla SM, Cohen GH, Sampson L, Vivier PM, Galea S. Prevalence of Depression  
40 Symptoms in US Adults Before and During the COVID-19 Pandemic. *JAMA Netw Open*.  
41  
42  
43  
44  
45
- 46 26. Agyapong VIO, Hrabok M, Juhas M, et al. Prevalence rates and predictors of generalized anxiety  
47 disorder symptoms in residents of fort mcmurray six months after a wildfire. *Front Psychiatry*.  
48  
49  
50  
51
- 52 27. Silver RC, Alison Holman E, McIntosh DN, Poulin M, Gil-Rivas V. Nationwide longitudinal  
53 study of psychological responses to September 11. *J Am Med Assoc*. 2002;288(10):1235-1244.  
54  
55  
56  
57  
58
- 59  
60

- 1  
2  
3 28. Lai J, Ma S, Wang Y, et al. Factors Associated With Mental Health Outcomes Among Health Care  
4 Workers Exposed to Coronavirus Disease 2019. *JAMA Netw open*. 2020;3(3):e203976.  
5  
6 doi:10.1001/jamanetworkopen.2020.3976  
7  
8  
9 29. AmeriSpeak: NORC's Breakthrough Panel-Based Research Platform | NORC.org.  
10  
11 <https://www.norc.org/Research/Capabilities/Pages/amerispeak.aspx>. Accessed May 18, 2020.  
12  
13  
14  
15  
16  
17  
18  
19  
20  
21  
22  
23  
24  
25  
26  
27  
28  
29  
30  
31  
32  
33  
34  
35  
36  
37  
38  
39  
40  
41  
42  
43  
44  
45  
46  
47  
48  
49  
50  
51  
52  
53  
54  
55  
56  
57  
58  
59  
60

**Table 1: Generalized anxiety disorder (GAD) and post-traumatic distress symptoms (PTSS) in adults 18 years and older in the U.S. by demographic characteristics and COVID-19 related stressors.**

|                                 | Generalized anxiety disorder |                     |         |                     |         | Post-traumatic stress symptoms |         |                     |         |
|---------------------------------|------------------------------|---------------------|---------|---------------------|---------|--------------------------------|---------|---------------------|---------|
|                                 | N (%)                        | % (95% CI)          | P-value | Odds ratio (95% CI) | P-value | % (95% CI)                     | P-value | Odds ratio (95% CI) | P-value |
| <b>Overall</b>                  | 1450                         | 10.9<br>(9.1–13.2)  |         |                     |         | 21.7<br>(19.1–24.6)            |         |                     |         |
| <b>Sex</b>                      |                              |                     |         |                     |         |                                |         |                     |         |
| Male                            | 725<br>(48.2)                | 7.6<br>(5.4–10.4)   | 0.0018  | ref                 |         | 17<br>(13.5–21.2)              | 0.0017  | ref                 |         |
| Female                          | 725<br>(51.8)                | 14.1<br>(11.2–17.6) |         | 1.57<br>(0.99–2.51) | 0.055   | 26.1<br>(22.3–30.2)            |         | 1.5<br>(1.1–2.1)    | 0.024   |
| <b>Age</b>                      |                              |                     |         |                     |         |                                |         |                     |         |
| 18-39 y                         | 623<br>(38.1)                | 16.6<br>(13.0–21.2) | <0.0001 | ref                 |         | 26.1<br>(21.1–31.3)            | <0.0001 | ref                 |         |
| 40-59 y                         | 461<br>(32.0)                | 9.2<br>(6.6–12.6)   |         | 0.6<br>(0.3–1.0)    | 0.035   | 25.5<br>(20.9–30.7)            |         | 1.0<br>(0.7–1.6)    | 0.850   |
| ≥60 y                           | 366<br>(29.9)                | 5.6<br>(3.4–9.1)    |         | 0.50<br>(0.2–1.1)   | 0.078   | 12.0<br>(8.5–16.6)             |         | 0.6<br>(0.3–1.0)    | 0.050   |
| <b>Race/Ethnicity</b>           |                              |                     |         |                     |         |                                |         |                     |         |
| Non-Hispanic White              | 939<br>(62.9)                | 10.8<br>(8.6–13.5)  | 0.3468  | ref                 |         | 22.0<br>(18.9–25.4)            | 0.1914  | ref                 |         |
| Non-Hispanic Black              | 143<br>(11.9)                | 11.9<br>(6.8–20.1)  |         | 0.81<br>(0.4–1.8)   | 0.603   | 18.9<br>(12.5–27.6)            |         | 0.7<br>(0.4–1.2)    | 0.157   |
| Hispanic                        | 258<br>(16.7)                | 11.3<br>(6.8–18.3)  |         | 0.8<br>(0.4–1.3)    | 0.307   | 27.0<br>(19.5–36.2)            |         | 1.1<br>(0.7–1.8)    | 0.749   |
| Non-Hispanic Asian              | 36<br>(3.1)                  | 0.8<br>(0.1–5.5)    |         | 0.1<br>(0.0–0.7)    | 0.023   | 8.7<br>(2.4–26.8)              |         | 0.3<br>(0.1–1.5)    | 0.142   |
| Other                           | 74<br>(5.4)                  | 15.1<br>(7.4–28.6)  |         | 1.1<br>(0.4–2.7)    | 0.919   | 15.8<br>(7.7–29.5)             |         | 0.6<br>(0.3–1.2)    | 0.131   |
| <b>Education</b>                |                              |                     |         |                     |         |                                |         |                     |         |
| No high school diploma          | 67<br>(9.9)                  | 13.4<br>(6.2–26.5)  | 0.0230  | 1.3<br>(0.5–3.2)    | 0.643   | 19.7<br>(10.9–32.8)            | 0.3825  | 0.7<br>(0.4–1.5)    | 0.393   |
| High school grad or GED         | 276<br>(27.9)                | 10.4<br>(6.8–15.4)  |         | 1.19<br>(0.6–2.4)   | 0.615   | 25.3<br>(19.5–32.2)            |         | 1.2<br>(0.7–1.9)    | 0.560   |
| Some college                    | 638<br>(27.6)                | 15.8<br>(12.4–20.0) |         | 2.0<br>(1.2–3.4)    | 0.013   | 22.2<br>(18.48–26.49)          |         | 1.0<br>(0.7–1.5)    | 0.933   |
| College grad or more            | 469<br>(34.6)                | 6.8<br>(4.7–9.7)    |         | ref                 |         | 18.9<br>(15.16–23.33)          |         | ref                 |         |
| <b>Marital status</b>           |                              |                     |         |                     |         |                                |         |                     |         |
| Married                         | 716<br>(47.8)                | 7.6<br>(5.6–10.3)   | 0.0016  | ref                 |         | 19.0<br>(15.8–22.8)            | 0.1686  | ref                 |         |
| Widowed, divorced, or separated | 254<br>(18.8)                | 10.2<br>(6.8–15.1)  |         | 1.3<br>(0.7–2.6)    | 0.392   | 20.9<br>(15.3–27.9)            |         | 1.1<br>(0.7–1.9)    | 0.693   |
| Never married                   | 345<br>(24.1)                | 14.3<br>(10.0–20.2) |         | 1.4<br>(0.8–2.6)    | 0.273   | 24.9<br>(19.0–31.9)            |         | 1.2<br>(0.7–1.8)    | 0.566   |
| Living with partner             | 135<br>(9.3)                 | 20.8<br>(12.7–32.0) |         | 1.5<br>(0.7–2.9)    | 0.286   | 28.6<br>(19.5–39.8)            |         | 0.97<br>(0.6–1.7)   | 0.925   |
| <b>Household income</b>         |                              |                     |         |                     |         |                                |         |                     |         |
| \$0 - \$19,999                  | 251<br>(20.3)                | 16.9<br>(11.7–23.7) | 0.0311  | 0.9<br>(0.4–1.9)    | 0.746   | 28.6<br>(21.7–36.8)            | 0.1188  | 1.2<br>(0.6–2.2)    | 0.660   |
| \$20,000 - \$44,999             | 358<br>(25.7)                | 12.0<br>(8.4–17.0)  |         | 0.6<br>(0.3–1.3)    | 0.219   | 19.5<br>(15.1–24.8)            |         | 0.7<br>(0.4–1.2)    | 0.158   |
| \$45,000 - \$74,999             | 356<br>(24.8)                | 9.0<br>(6.0–13.2)   |         | 0.6<br>(0.3–1.2)    | 0.138   | 22.0<br>(17.0–28.1)            |         | 0.9<br>(0.6–1.5)    | 0.688   |
| ≥\$75,000                       | 452<br>(29.2)                | 8.5<br>(5.7–12.6)   |         | ref                 |         | 19.7<br>(15.3–25.0)            |         | ref                 |         |
| <b>Household savings</b>        |                              |                     |         |                     |         |                                |         |                     |         |
| \$0 - \$4,999                   | 578<br>(42.9)                | 17.2<br>(13.6–21.6) | <0.0001 | 1.9<br>(1.2–3.1)    | 0.010   | 27.6<br>(23.2–32.6)            | 0.0011  | 1.2<br>(0.8–1.9)    | 0.349   |

|                                     |               |                       |         |                    |         |                       |         |                    |         |
|-------------------------------------|---------------|-----------------------|---------|--------------------|---------|-----------------------|---------|--------------------|---------|
| ≥\$5,000                            | 827<br>(57.1) | 6.9<br>(5.0 – 9.3)    |         | ref                |         | 18.0<br>(14.8 – 21.8) |         | ref                |         |
| <b>COVID-related stressor score</b> |               |                       |         |                    |         |                       |         |                    |         |
| Low                                 | 460<br>(31.2) | 4.0<br>(2.2 – 7.0)    | <0.0001 | ref                |         | 12.4<br>(8.9 – 17.0)  | <0.0001 | ref                |         |
| Medium                              | 544<br>(37.0) | 8.6<br>(6.2 – 11.8)   |         | 2.0<br>(1.0 – 4.0) | 0.046   | 17.4<br>(13.6 – 22.0) |         | 1.4<br>(0.9 – 2.3) | 0.139   |
| High                                | 446<br>(31.8) | 20.5<br>(16.1 – 25.8) |         | 4.5<br>(2.3 – 8.8) | <0.0001 | 35.7<br>(30.2 – 41.6) |         | 3.3<br>(2.1 – 5.2) | <0.0001 |
| Household size (mean)               | 3.2           |                       |         | 1.0<br>(0.8– 1.1)  | 0.710   |                       |         | 1.0<br>(0.9 – 1.1) | 0.910   |

All percentages are weighted. Missing data: household income (n=33), household savings (n=45), and COVID-19 stressor score (n=3). GED is the general education diploma. COVID-19 stressor score calculated from stressor summation ranging from 0-13; categories represent low (score of 0-2), medium (score of 3-4), and high (score of 5-14) exposure to stressors due to COVID-19. GAD defined by a GAD-7 score ≥15. PTSS defined by a 4-item PTSD checklist (PCL) score ≥3. Two-tailed chi-square analysis conducted for significance testing. This analysis is based on data from our COVID-19 and Life stressors Impact on Mental Health and Well-being Study (CLIMB).



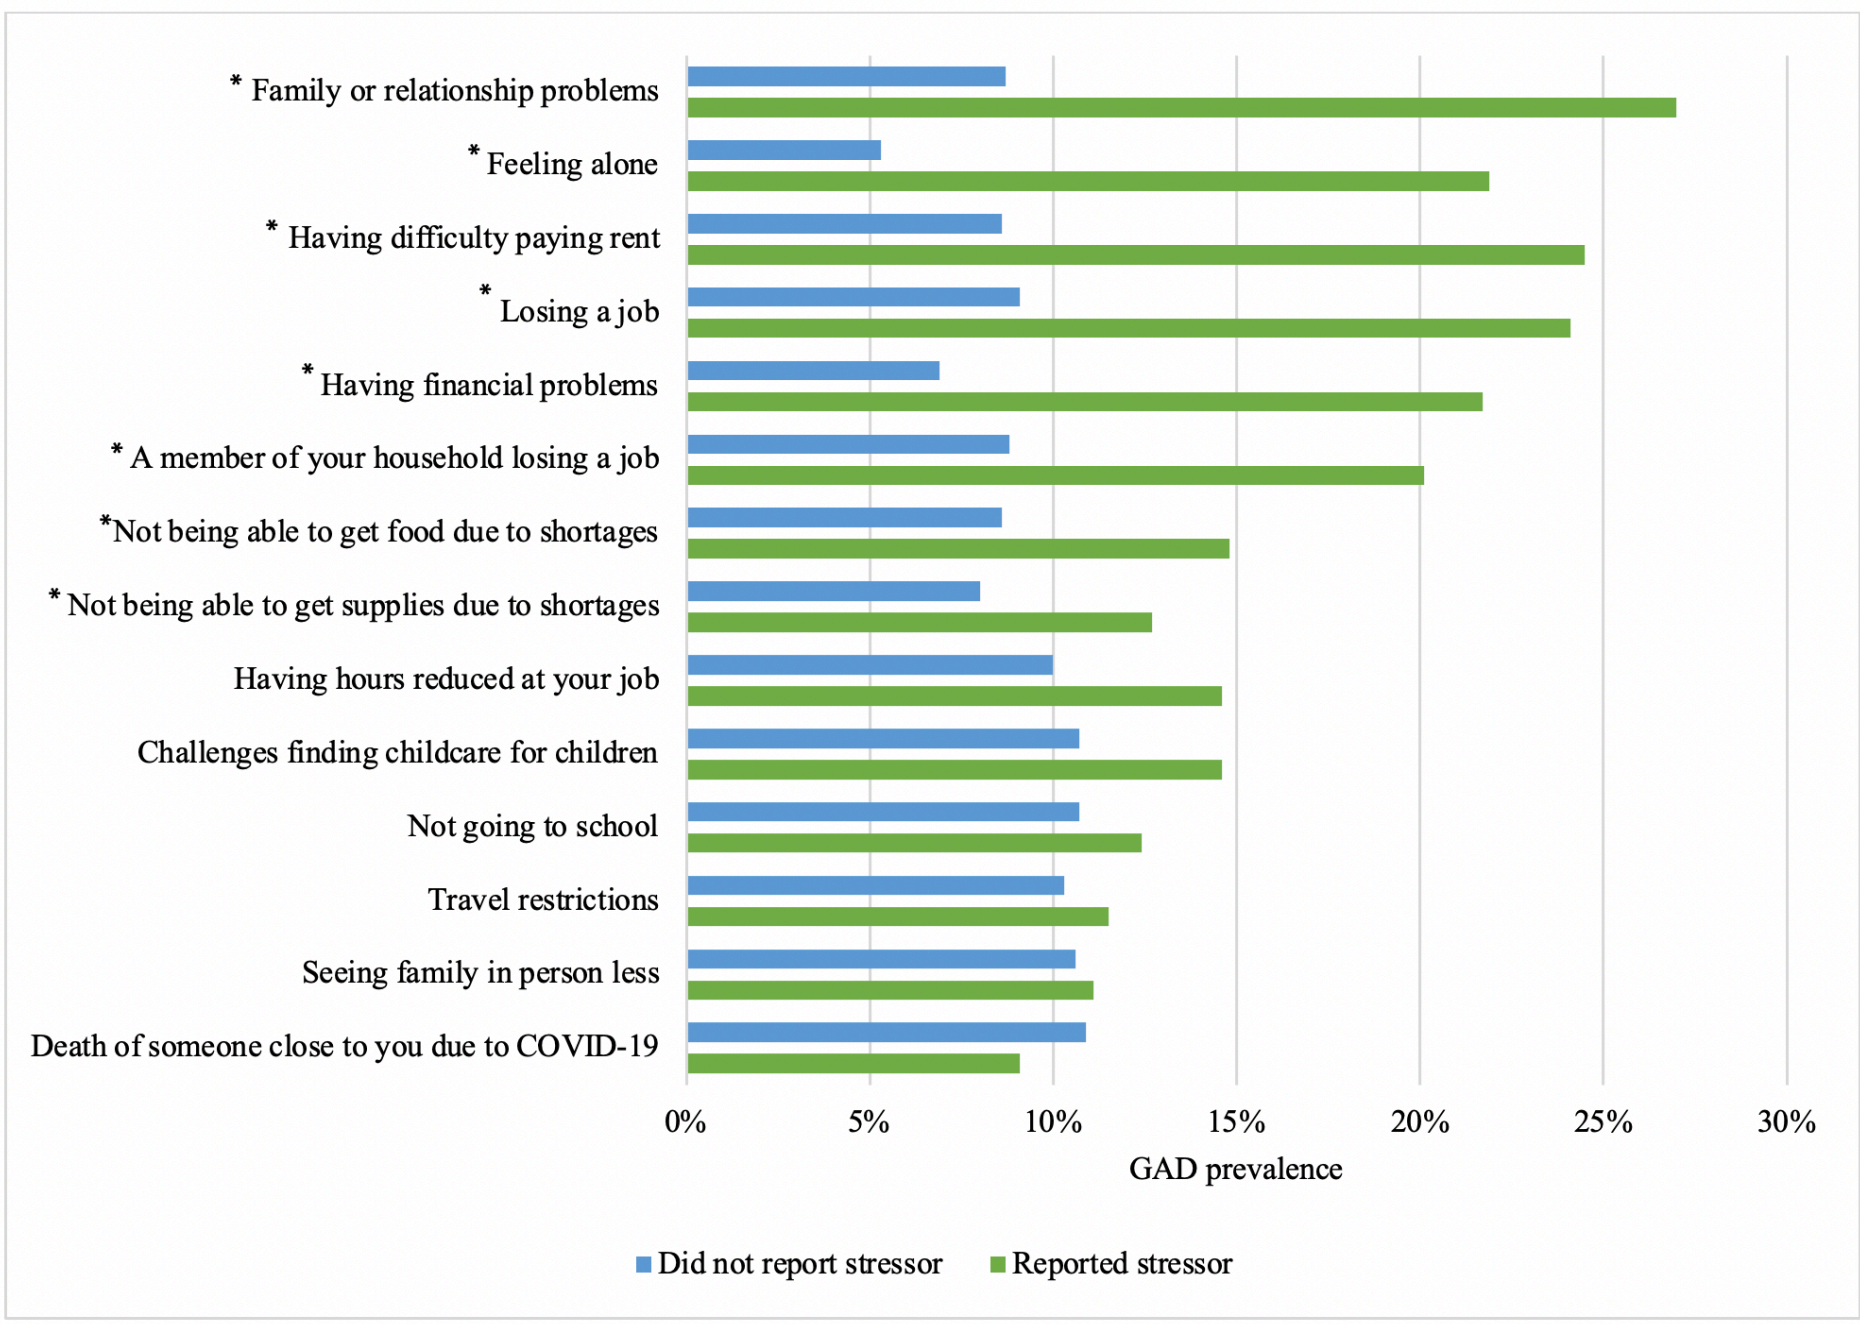

\*P<0.05  
 GAD defined by a GAD-7 score ≥15. Percentages are weighted to the U.S. population. This analysis is based on data from the COVID-19 and Life stressors Impact on Mental Health and Well-being Study (CLIMB).  
 For peer review only: <http://bmjopen.bmj.com/site/about/guidelines.xhtml>

**Figure 2: Distribution of COVID-19 stressors by generalized anxiety disorder (GAD) status**

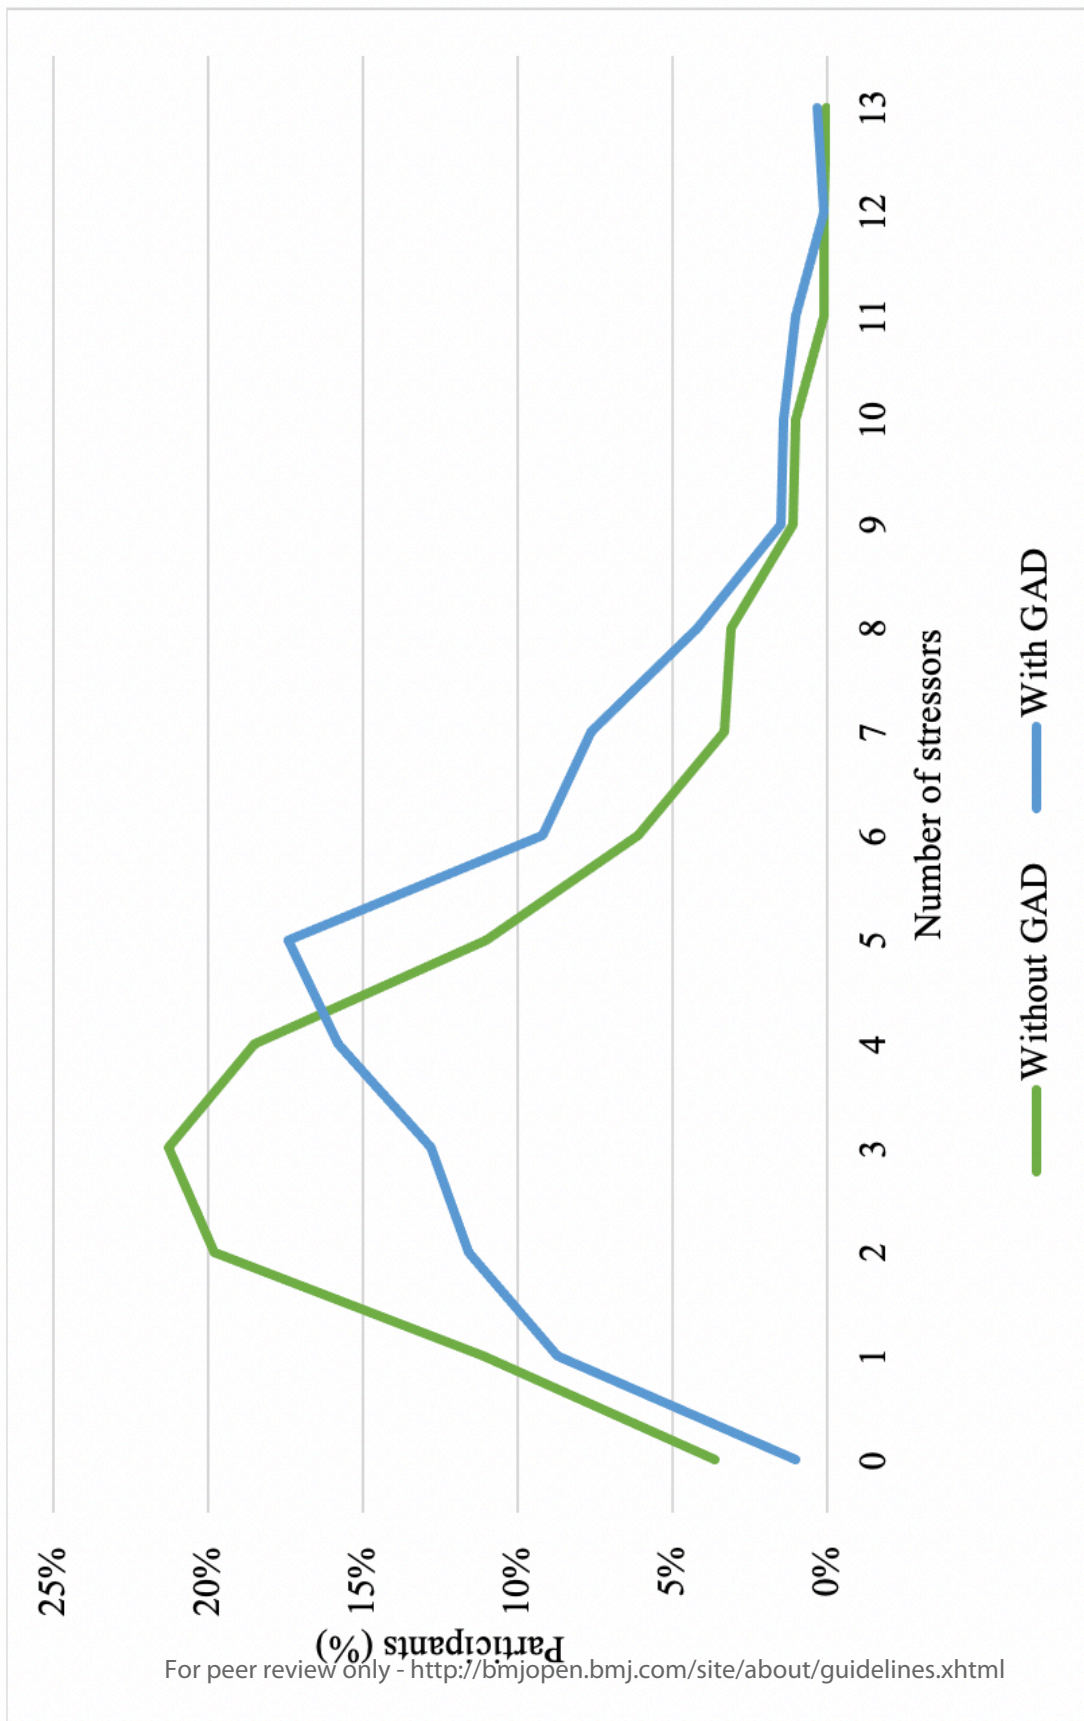

For peer review only - <http://bmjopen.bmj.com/site/about/guidelines.xhtml>

GAD defined by a GAD-7 score  $\geq 15$ . Percentages are weighted to the U.S. population. This analysis is based on data from the COVID-19 and Life stressors Impact on Mental Health and Well-being Study (CLIMB).

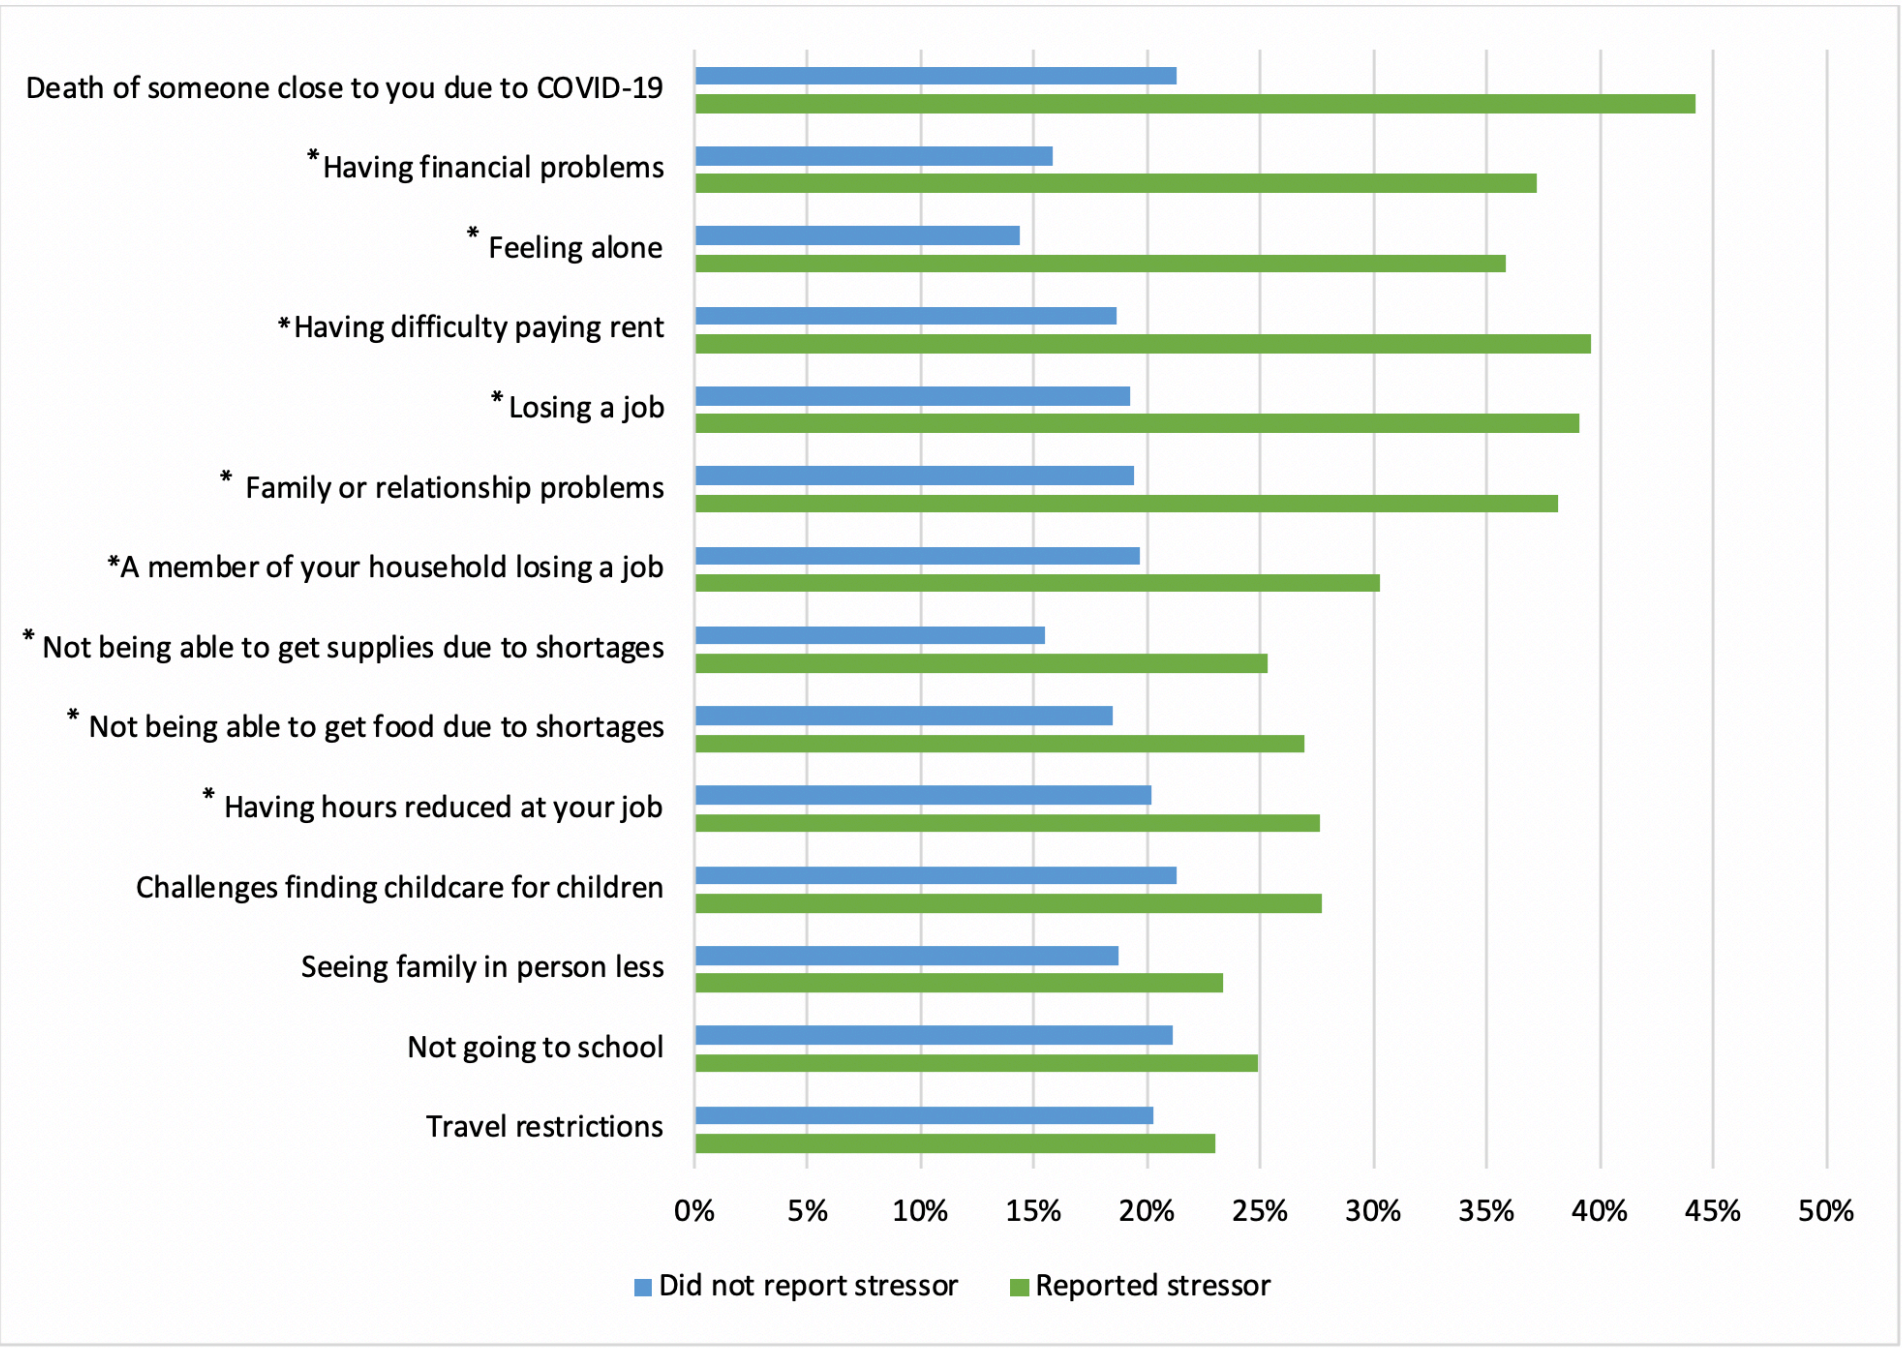

\*P<0.05

For peer review only - <http://bmjopen.bmj.com/site/about/guidelines.xhtml>

PTSS defined by a 4-item PTSD checklist (PCL) score  $\geq 3$ . Percentages are weighted to the U.S. population. This analysis is based on data from our COVID-19 and Life stressors Impact on Mental Health and Well-being Study (CLIMB).

**Figure 4: Distribution of COVID-19 stressors by post-traumatic stress symptoms (PTSS) status**

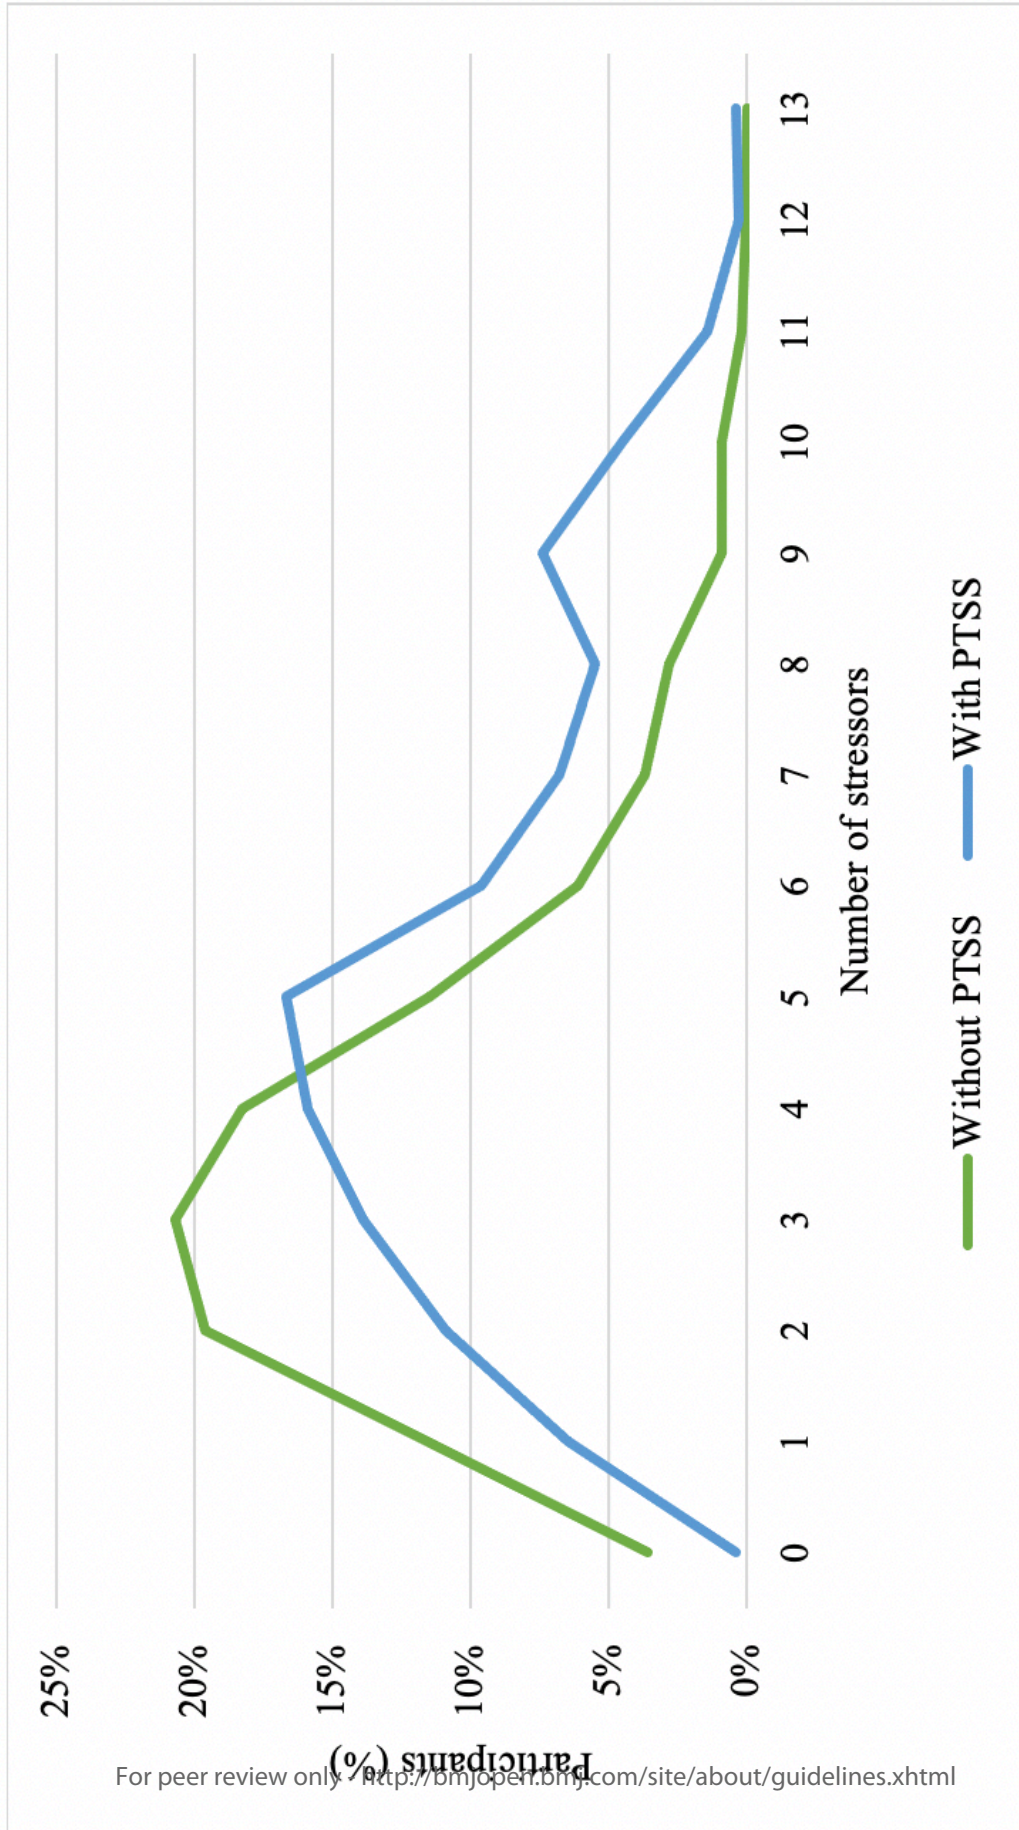

PTSS defined by a 4-item PTSD checklist (PCL) score  $\geq 3$ . Percentages are weighted to the U.S. population. This analysis is based on data from the COVID-19 and Life Stressors Impact on Mental Health and Well-being Study (CLIMB).

**Appendix table 1: multivariable regression model of probable generalized anxiety disorder (GAD) and post-traumatic distress symptoms (PTSS) in adults 18 years and older in the U.S. by demographic characteristics and COVID-19 related stressors (continuous variable).**

|                                        | Probable GAD           |         | PTSS                   |         |
|----------------------------------------|------------------------|---------|------------------------|---------|
|                                        | Odds ratio<br>(95% CI) | P-value | Odds ratio<br>(95% CI) | P-value |
| <b>Gender</b>                          |                        |         |                        |         |
| Male                                   | ref                    |         | ref                    |         |
| Female                                 | 1.5<br>(1.0 – 2.4)     | 0.076   | 1.5<br>(1.0 – 2.1)     | 0.034   |
| <b>Age</b>                             |                        |         |                        |         |
| 18-39 y                                | ref                    |         | ref                    |         |
| 40-59 y                                | 0.6<br>(0.3 – 1.0)     | 0.047   | 1.1<br>(0.7 – 1.6)     | 0.805   |
| ≥60 y                                  | 0.50<br>(0.2 – 1.1)    | 0.100   | 0.6<br>(0.3 – 1.1)     | 0.082   |
| <b>Race</b>                            |                        |         |                        |         |
| Non-Hispanic White                     | ref                    |         | ref                    |         |
| Non-Hispanic Black                     | 0.8<br>(0.3 – 1.9)     | 0.583   | 0.7<br>(0.4 – 1.2)     | 0.163   |
| Hispanic                               | 0.7<br>(0.4 – 1.3)     | 0.229   | 1.0<br>(0.6 – 1.7)     | 0.882   |
| Non-Hispanic Asian                     | 0.1<br>(0.0 – 0.6)     | 0.017   | 0.3<br>(0.1 – 1.4)     | 0.126   |
| Other Race – Including<br>Multi-Racial | 1.0<br>(0.4 – 2.5)     | 0.971   | 0.5<br>(0.2 – 1.1)     | 0.084   |
| <b>Education</b>                       |                        |         |                        |         |
| No high school diploma                 | 1.1<br>(0.4 – 3.1)     | 0.860   | 0.7<br>(0.3 – 1.4)     | 0.288   |
| High school graduate or<br>equivalent  | 1.1<br>(0.5 – 2.2)     | 0.818   | 1.1<br>(0.7 – 1.8)     | 0.708   |
| Some college                           | 1.8<br>(1.0 – 3.1)     | 0.034   | 1.0<br>(0.6 – 1.4)     | 0.822   |
| College grad or more                   | ref                    |         | ref                    |         |
| <b>Marital status</b>                  |                        |         |                        |         |
| Married                                | ref                    |         | ref                    |         |
| Widowed, divorced, or<br>separated     | 1.3<br>(0.7 – 2.6)     | 0.424   | 1.1<br>(0.6 – 1.9)     | 0.758   |
| Never married                          | 1.3<br>(0.7 – 2.5)     | 0.402   | 1.1<br>(0.7 – 1.7)     | 0.753   |
| Living with partner                    | 1.4<br>(0.7 – 3.0)     | 0.322   | 0.9<br>(0.5 – 1.6)     | 0.777   |
| <b>Household income</b>                |                        |         |                        |         |
| \$0 - \$19,999                         | 0.9<br>(0.4 – 1.9)     | 0.767   | 1.2<br>(0.6 – 2.2)     | 0.652   |
| \$20,000 - \$44,999                    | 0.7<br>(0.3 – 1.4)     | 0.295   | 0.7<br>(0.4 – 1.2)     | 0.193   |

|                                |                    |        |                    |        |
|--------------------------------|--------------------|--------|--------------------|--------|
| \$45,000 - \$74,999            | 0.6<br>(0.3 – 1.2) | 0.162  | 0.9<br>(0.6 – 1.5) | 0.717  |
| ≥\$75,000                      | ref                |        | ref                |        |
| <b>Household savings</b>       |                    |        |                    |        |
| \$0 - \$4,999                  | 2.0<br>(1.2 – 3.2) | 0.008  | 1.3<br>(0.8 – 1.9) | 0.290  |
| ≥\$5,000                       |                    | ref    | ref                |        |
| <b>Household size</b>          | 1.0<br>(0.8 – 1.1) | 0.631  | 1.0<br>(0.9 – 1.1) | 0.962  |
| <b>COVID-related stressors</b> | 1.3<br>(1.2 – 1.4) | <0.001 | 1.3<br>(1.2 – 1.4) | <0.001 |

All percentages are weighted. Missing data: household income (n=33), household savings (n=45), and COVID-19 stressor score (n=3). GED is the general education diploma. GAD defined by a GAD-7 score ≥15. PTSS defined by a 4-item PTSD checklist (PCL) score ≥3.

**Appendix table 2: multivariable regression model of probable generalized anxiety disorder (GAD) and post-traumatic distress symptoms (PTSS) in adults 18 years and older in the U.S. by demographic characteristics and COVID-19 related economic and social stressors.**

|                                        | Probable GAD           |         | PTSS                   |         |
|----------------------------------------|------------------------|---------|------------------------|---------|
|                                        | Odds ratio<br>(95% CI) | P-value | Odds ratio<br>(95% CI) | P-value |
| <b>Gender</b>                          |                        |         |                        |         |
| Male                                   | ref                    |         | ref                    |         |
| Female                                 | 1.6<br>(1.0 – 2.5)     | 0.064   | 1.5<br>(1.0 – 2.6)     | 0.032   |
| <b>Age</b>                             |                        |         |                        |         |
| 18-39 y                                | ref                    |         | ref                    |         |
| 40-59 y                                | 0.6<br>(0.3 – 1.0)     | 0.043   | 1.0<br>(0.3 – 1.0)     | 0.818   |
| ≥60 y                                  | 0.5<br>(0.2 – 1.1)     | 0.105   | 0.6<br>(0.2 – 1.1)     | 0.084   |
| <b>Race</b>                            |                        |         |                        |         |
| Non-Hispanic White                     | ref                    |         | ref                    |         |
| Non-Hispanic Black                     | 0.8<br>(0.3 – 1.8)     | 0.581   | 0.6<br>(0.3 – 1.8)     | 0.162   |
| Hispanic                               | 0.7<br>(0.4 – 1.2)     | 0.180   | 1.0<br>(0.4 – 1.2)     | 0.900   |
| Non-Hispanic Asian                     | 0.1<br>(0.0 – 0.6)     | 0.016   | 0.3<br>(0.0 – 0.6)     | 0.120   |
| Other Race – Including<br>Multi-Racial | 1.0<br>(0.4 – 2.4)     | 0.937   | 0.5<br>(0.4 – 2.4)     | 0.084   |
| <b>Education</b>                       |                        |         |                        |         |
| No high school diploma                 | 1.1<br>(0.4 – 3.0)     | 0.907   | 0.6<br>(0.4 – 3.0)     | 0.278   |
| High school graduate or<br>equivalent  | 1.1<br>(0.5 – 2.1)     | 0.892   | 1.1<br>(0.5 – 2.1)     | 0.728   |
| Some college                           | 1.8<br>(1.0 – 3.0)     | 0.041   | 1.0<br>(1.0 – 3.0)     | 0.809   |
| College grad or more                   | ref                    |         | ref                    |         |
| <b>Marital status</b>                  |                        |         |                        |         |
| Married                                | ref                    |         | ref                    |         |
| Widowed, divorced, or<br>separated     | 1.3<br>(0.7 – 2.6)     | 0.416   | 1.1<br>(0.7 – 2.6)     | 0.755   |
| Never married                          | 1.3<br>(0.7 – 2.4)     | 0.420   | 1.1<br>(0.7 – 2.4)     | 0.764   |
| Living with partner                    | 1.4<br>(0.7 – 3.0)     | 0.327   | 0.9<br>(0.7 – 3.0)     | 0.772   |
| <b>Household income</b>                |                        |         |                        |         |
| \$0 - \$19,999                         | 0.9<br>(0.4 – 1.9)     | 0.738   | 1.2<br>(0.4 – 1.9)     | 0.668   |

|                                                     |                    |        |                    |        |
|-----------------------------------------------------|--------------------|--------|--------------------|--------|
| \$20,000 - \$44,999                                 | 0.7<br>(0.3 – 1.4) | 0.276  | 0.7<br>(0.3 – 1.4) | 0.195  |
| \$45,000 - \$74,999                                 | 0.6<br>(0.3 – 1.2) | 0.160  | 0.9<br>(0.3 – 1.2) | 0.713  |
| ≥\$75,000                                           | ref                |        | ref                |        |
| <b>Household savings</b>                            |                    |        |                    |        |
| \$0 - \$4,999                                       | 2.0<br>(1.2 – 3.2) | 0.008  | 1.3<br>(1.2 – 3.2) | 0.290  |
| ≥\$5,000                                            | ref                |        | ref                |        |
| <b>Household size</b>                               | 1.0<br>(0.8– 1.1)  | 0.627  | 1.0<br>(0.8– 1.1)  | 0.956  |
| <b>COVID-related financial stressors</b>            | 1.4<br>(1.2 – 1.6) | <0.001 | 1.3<br>(1.2 – 1.6) | <0.001 |
| <b>COVID-related social and emotional stressors</b> | 1.2<br>(1.1 – 1.5) | 0.011  | 1.3<br>(1.1 – 1.5) | <0.001 |

All percentages are weighted. Missing data: household income (n=33), household savings (n=45), and COVID-19 stressor score (n=3). GED is the general education diploma. GAD defined by a GAD-7 score  $\geq 15$ . PTSS defined by a 4-item PTSD checklist (PCL) score  $\geq 3$ . Financial stressors included losing a job, having difficulty paying rent, having financial problems, a member of your family losing a job, and having hours reduced at your job. Social and emotional stressors included feeling alone, having relationship problems, family or relationship problems, not being able to get food due to shortages, not being able to get supplies due to shortages, challenges finding childcare, not going to school, travel restrictions, seeing family less in person, and death of someone close to you due to COVID-19.



## STROBE (Strengthening The Reporting of OBServational Studies in Epidemiology) Checklist

A checklist of items that should be included in reports of observational studies. You must report the page number in your manuscript where you consider each of the items listed in this checklist. If you have not included this information, either revise your manuscript accordingly before submitting or note N/A.

**Note:** An Explanation and Elaboration article discusses each checklist item and gives methodological background and published examples of transparent reporting. The STROBE checklist is best used in conjunction with this article (freely available on the Web sites of PLoS Medicine at <http://www.plosmedicine.org/>, Annals of Internal Medicine at <http://www.annals.org/>, and Epidemiology at <http://www.epidem.com/>). Information on the STROBE Initiative is available at [www.strobe-statement.org](http://www.strobe-statement.org).

| Section and Item     | Item No. | Recommendation                                                                                                                                                                                                                                                                                                                                                                                                                                                                 | Reported on Page No. |
|----------------------|----------|--------------------------------------------------------------------------------------------------------------------------------------------------------------------------------------------------------------------------------------------------------------------------------------------------------------------------------------------------------------------------------------------------------------------------------------------------------------------------------|----------------------|
| Title and Abstract   | 1        | (a) Indicate the study's design with a commonly used term in the title or the abstract                                                                                                                                                                                                                                                                                                                                                                                         |                      |
|                      |          | (b) Provide in the abstract an informative and balanced summary of what was done and what was found                                                                                                                                                                                                                                                                                                                                                                            |                      |
| <b>Introduction</b>  |          |                                                                                                                                                                                                                                                                                                                                                                                                                                                                                |                      |
| Background/Rationale | 2        | Explain the scientific background and rationale for the investigation being reported                                                                                                                                                                                                                                                                                                                                                                                           |                      |
| Objectives           | 3        | State specific objectives, including any prespecified hypotheses                                                                                                                                                                                                                                                                                                                                                                                                               |                      |
| <b>Methods</b>       |          |                                                                                                                                                                                                                                                                                                                                                                                                                                                                                |                      |
| Study Design         | 4        | Present key elements of study design early in the paper                                                                                                                                                                                                                                                                                                                                                                                                                        |                      |
| Setting              | 5        | Describe the setting, locations, and relevant dates, including periods of recruitment, exposure, follow-up, and data collection                                                                                                                                                                                                                                                                                                                                                |                      |
| Participants         | 6        | (a) <i>Cohort study</i> —Give the eligibility criteria, and the sources and methods of selection of participants. Describe methods of follow-up<br><br><i>Case-control study</i> —Give the eligibility criteria, and the sources and methods of case ascertainment and control selection. Give the rationale for the choice of cases and controls<br><br><i>Cross-sectional study</i> —Give the eligibility criteria, and the sources and methods of selection of participants |                      |
|                      |          | (b) <i>Cohort study</i> —For matched studies, give matching criteria and number of exposed and unexposed<br><br><i>Case-control study</i> —For matched studies, give matching criteria and the number of controls per case                                                                                                                                                                                                                                                     |                      |
| Variables            | 7        | Clearly define all outcomes, exposures, predictors, potential confounders, and effect modifiers. Give diagnostic criteria, if applicable                                                                                                                                                                                                                                                                                                                                       |                      |

| Section and Item             | Item No. | Recommendation                                                                                                                                                                                                                                                                                            | Reported on Page No. |
|------------------------------|----------|-----------------------------------------------------------------------------------------------------------------------------------------------------------------------------------------------------------------------------------------------------------------------------------------------------------|----------------------|
| Data Sources/<br>Measurement | 8*       | For each variable of interest, give sources of data and details of methods of assessment (measurement). Describe comparability of assessment methods if there is more than one group                                                                                                                      |                      |
| Bias                         | 9        | Describe any efforts to address potential sources of bias                                                                                                                                                                                                                                                 |                      |
| Study Size                   | 10       | Explain how the study size was arrived at                                                                                                                                                                                                                                                                 |                      |
| Quantitative Variables       | 11       | Explain how quantitative variables were handled in the analyses. If applicable, describe which groupings were chosen and why                                                                                                                                                                              |                      |
| Statistical Methods          | 12       | (a) Describe all statistical methods, including those used to control for confounding                                                                                                                                                                                                                     |                      |
|                              |          | (b) Describe any methods used to examine subgroups and interactions                                                                                                                                                                                                                                       |                      |
|                              |          | (c) Explain how missing data were addressed                                                                                                                                                                                                                                                               |                      |
|                              |          | (d) <i>Cohort study</i> —If applicable, explain how loss to follow-up was addressed<br><i>Case-control study</i> —If applicable, explain how matching of cases and controls was addressed<br><i>Cross-sectional study</i> —If applicable, describe analytical methods taking account of sampling strategy |                      |
|                              |          | (e) Describe any sensitivity analyses                                                                                                                                                                                                                                                                     |                      |
| <b>Results</b>               |          |                                                                                                                                                                                                                                                                                                           |                      |
| Participants                 | 13*      | (a) Report numbers of individuals at each stage of study—eg numbers potentially eligible, examined for eligibility, confirmed eligible, included in the study, completing follow-up, and analysed                                                                                                         |                      |
|                              |          | (b) Give reasons for non-participation at each stage                                                                                                                                                                                                                                                      |                      |
|                              |          | (c) Consider use of a flow diagram                                                                                                                                                                                                                                                                        |                      |
| Descriptive Data             | 14*      | (a) Give characteristics of study participants (eg demographic, clinical, social) and information on exposures and potential confounders                                                                                                                                                                  |                      |
|                              |          | (b) Indicate number of participants with missing data for each variable of interest                                                                                                                                                                                                                       |                      |
|                              |          | (c) <i>Cohort study</i> —Summarise follow-up time (eg, average and total amount)                                                                                                                                                                                                                          |                      |
| Outcome Data                 | 15*      | <i>Cohort study</i> —Report numbers of outcome events or summary measures over time                                                                                                                                                                                                                       |                      |
|                              |          | <i>Case-control study</i> —Report numbers in each exposure category, or summary measures of exposure                                                                                                                                                                                                      |                      |
|                              |          | <i>Cross-sectional study</i> —Report numbers of outcome events or summary measures                                                                                                                                                                                                                        |                      |

| Section and Item         | Item No. | Recommendation                                                                                                                                                                                               | Reported on Page No. |
|--------------------------|----------|--------------------------------------------------------------------------------------------------------------------------------------------------------------------------------------------------------------|----------------------|
| Main Results             | 16       | (a) Give unadjusted estimates and, if applicable, confounder-adjusted estimates and their precision (eg, 95% confidence interval). Make clear which confounders were adjusted for and why they were included |                      |
|                          |          | (b) Report category boundaries when continuous variables were categorized                                                                                                                                    |                      |
|                          |          | (c) If relevant, consider translating estimates of relative risk into absolute risk for a meaningful time period                                                                                             |                      |
| Other Analyses           | 17       | Report other analyses done—eg analyses of subgroups and interactions, and sensitivity analyses                                                                                                               |                      |
| <b>Discussion</b>        |          |                                                                                                                                                                                                              |                      |
| Key Results              | 18       | Summarise key results with reference to study objectives                                                                                                                                                     |                      |
| Limitations              | 19       | Discuss limitations of the study, taking into account sources of potential bias or imprecision. Discuss both direction and magnitude of any potential bias                                                   |                      |
| Interpretation           | 20       | Give a cautious overall interpretation of results considering objectives, limitations, multiplicity of analyses, results from similar studies, and other relevant evidence                                   |                      |
| Generalisability         | 21       | Discuss the generalisability (external validity) of the study results                                                                                                                                        |                      |
| <b>Other Information</b> |          |                                                                                                                                                                                                              |                      |
| Funding                  | 22       | Give the source of funding and the role of the funders for the present study and, if applicable, for the original study on which the present article is based                                                |                      |

\*Give information separately for cases and controls in case-control studies and, if applicable, for exposed and unexposed groups in cohort and cross-sectional studies.

**Once you have completed this checklist, please save a copy and upload it as part of your submission. DO NOT include this checklist as part of the main manuscript document. It must be uploaded as a separate file.**

# BMJ Open

**The mental health consequences of COVID-19: a nationally representative cross-sectional study of pandemic-related stressors and anxiety disorders in the United States.**

|                                 |                                                                                                                                                                                                                                                                                                                                           |
|---------------------------------|-------------------------------------------------------------------------------------------------------------------------------------------------------------------------------------------------------------------------------------------------------------------------------------------------------------------------------------------|
| Journal:                        | <i>BMJ Open</i>                                                                                                                                                                                                                                                                                                                           |
| Manuscript ID                   | bmjopen-2020-044125.R3                                                                                                                                                                                                                                                                                                                    |
| Article Type:                   | Original research                                                                                                                                                                                                                                                                                                                         |
| Date Submitted by the Author:   | 22-Jun-2021                                                                                                                                                                                                                                                                                                                               |
| Complete List of Authors:       | Abdalla, Salma; Boston University School of Public Health, Epidemiology<br>Ettman, Catherine; Boston University School of Public Health; Brown<br>University School of Public Health<br>Cohen, Gregory; Boston University School of Public Health, Epidemiology<br>Galea, Sandro; Boston University School of Public Health, Epidemiology |
| <b>Primary Subject Heading</b>: | Mental health                                                                                                                                                                                                                                                                                                                             |
| Secondary Subject Heading:      | Public health, Epidemiology                                                                                                                                                                                                                                                                                                               |
| Keywords:                       | MENTAL HEALTH, COVID-19, Anxiety disorders < PSYCHIATRY                                                                                                                                                                                                                                                                                   |
|                                 |                                                                                                                                                                                                                                                                                                                                           |

SCHOLARONE™  
Manuscripts



I, the Submitting Author has the right to grant and does grant on behalf of all authors of the Work (as defined in the below author licence), an exclusive licence and/or a non-exclusive licence for contributions from authors who are: i) UK Crown employees; ii) where BMJ has agreed a CC-BY licence shall apply, and/or iii) in accordance with the terms applicable for US Federal Government officers or employees acting as part of their official duties; on a worldwide, perpetual, irrevocable, royalty-free basis to BMJ Publishing Group Ltd ("BMJ") its licensees and where the relevant Journal is co-owned by BMJ to the co-owners of the Journal, to publish the Work in this journal and any other BMJ products and to exploit all rights, as set out in our [licence](#).

The Submitting Author accepts and understands that any supply made under these terms is made by BMJ to the Submitting Author unless you are acting as an employee on behalf of your employer or a postgraduate student of an affiliated institution which is paying any applicable article publishing charge ("APC") for Open Access articles. Where the Submitting Author wishes to make the Work available on an Open Access basis (and intends to pay the relevant APC), the terms of reuse of such Open Access shall be governed by a Creative Commons licence – details of these licences and which [Creative Commons](#) licence will apply to this Work are set out in our licence referred to above.

Other than as permitted in any relevant BMJ Author's Self Archiving Policies, I confirm this Work has not been accepted for publication elsewhere, is not being considered for publication elsewhere and does not duplicate material already published. I confirm all authors consent to publication of this Work and authorise the granting of this licence.

1  
2  
3 **The mental health consequences of COVID-19: a nationally representative cross-sectional study of**  
4  
5 **pandemic-related stressors and anxiety disorders in the United States.**  
6

7 Salma M Abdalla<sup>1</sup>, Catherine K Ettman<sup>1,2</sup>, Gregory H Cohen<sup>1,3</sup>, Sandro Galea<sup>1</sup>  
8

9 <sup>1</sup> Boston University School of Public Health, Boston, MA, USA

10 <sup>2</sup> Brown University School of Public Health, Providence, RI, USA

11 <sup>3</sup> Columbia Mailman School of Public Health, NYC, NY, USA  
12  
13  
14  
15

16 **Corresponding author**

17 Salma M Abdalla

18 Department of Epidemiology

19 Boston University School of Public Health

20 Boston, Massachusetts, 02119, USA

21 **Telephone:** +16173583407

22 **Email:** [abdallas@bu.edu](mailto:abdallas@bu.edu)  
23  
24  
25  
26

27 **Word Count:** 2712

28 **Keywords:** COVID-19, mental health, anxiety, generalized anxiety disorder, post-traumatic stress  
29 symptoms, economic stressors  
30  
31  
32  
33  
34  
35  
36  
37  
38  
39  
40  
41  
42  
43  
44  
45  
46  
47  
48  
49  
50  
51  
52  
53  
54  
55  
56  
57  
58  
59  
60

## **Abstract**

**Objective:** to document the prevalence of probable anxiety disorders in the United States during the COVID-19 pandemic.

**Design:** cross-sectional analysis

**Setting:** a nationally representative sample in the United States between March 31 and April 13, 2020

**Participants:** 1450 English-speaking adult participants in the AmeriSpeak Panel. AmeriSpeak is a probability-based panel designed to be representative of households in the United States.

**Main outcome measures:** prevalence of probable generalized anxiety disorder (GAD) using the GAD-7 and post-traumatic stress symptoms (PTSS) using the 4-items PTSD checklist (PCL). Both outcomes were adjusted for demographics and COVID-19 related stressors.

**Results:** The majority of participants were female (51.8%), non-Hispanic white (62.9%), and reported a household saving of \$5000 or more. Those between 18-29 years old were the largest age group (38.1%) compared to 40-59 years (32.0%) and 60 years or more (29.9%). The prevalence of probable GAD was 10.9% (95% CI: 9.1-13.2) and the prevalence of PTSS was 21.7% (95% CI: 19.1-24.6). Among participants reporting five or more COVID-19 related stressors, the prevalence of probable GAD was 20.5% (95% CI: 16.1-25.8) and the prevalence of PTSS was 35.7% (95% CI: 30.2-41.6). Reporting five or more COVID-19 related stressors was a predictor of both probable GAD (OR=4.5, 95% CI: 2.3-8.8) and PTSS (OR=3.3, 95% CI: 2.1-5.2).

**Conclusions:** The prevalence of probable anxiety disorders in the United States, as the COVID-19 pandemic and policies implemented to tackle it unfolded, is higher than estimates reported prior to the pandemic and estimates reported following other mass traumatic events. Exposure to COVID-19 related stressors is associated with higher prevalence of both probable GAD and PTSS, highlighting the role these stressors play in increasing the risk of developing of anxiety disorders in the United States. Mitigation and recovery policies should take into account the mental health toll the pandemic had on United States population.

### **Strengths and limitations of this study**

- This analysis uses a nationally representative sample examining the risk of developing of anxiety disorders in the United States.
- The study was conducted within a short duration following the implementation of state-wide policies to tackle the COVID-19 pandemic and includes questions about a wide-range of social and economic COVID-19 related stressors.
- To assess the risk of developing of anxiety disorders, the study uses screening, rather than diagnostic tools. However, these screening tools have been validated extensively for assessment of anxiety disorders in general populations.
- The use of a pre-selected panel of participants can lead to selection bias.



## **Introduction**

The effect of the COVID-19 pandemic on the American public has been profound. More than 600,000 people have died from COVID-19 in the United States, and a number of unprecedented physical distancing policies, continue to be in place to limit the spread of the pandemic. These policies changed daily life for most people in the United States significantly and continue to have large scale social and economic consequences. The physical toll of COVID-19, coupled with the ubiquity and severity of these policies, distinguish the pandemic as a mass traumatic event, one that is associated with extensive loss of lives and financial strains that can lead to severe and lasting psychological consequences, anxiety disorders in particular.<sup>1-4</sup>

Uncertainty, fear, economic and social costs, and disruptions to daily life all contribute to a high prevalence of anxiety disorders following mass traumatic events.<sup>5,6</sup> For example, a study assessing the mental health consequences of the Ebola epidemic in Sierra Leone found that, a year following the epidemic, 6% of participants reached the threshold for a combined anxiety-depression measure and 27% reached the threshold for post-traumatic stress disorder (PTSD).<sup>7</sup> Another study estimated that, following Hurricane Katrina, the 30-day prevalence of PTSD was 30.3% among residents of the New Orleans metropolitan area, which was severely affected by the hurricane.<sup>8</sup> This previous work suggests that the COVID-19 pandemic will have a substantial impact on the prevalence of anxiety disorders in the United States. Early evidence has found that COVID-19 pandemic is associated with adverse mental health consequences.<sup>9-21</sup> However, to our knowledge, the association between COVID-19 and related stressors—both due to the pandemic and policies implemented to halt its spread—on the risk of developing of anxiety disorders in the United States has yet to be fully documented.

We assessed the prevalence of anxiety disorders, specifically probable generalized anxiety disorder (GAD) and post-traumatic stress symptoms (PTSS), as the COVID-19 pandemic unfolded in the United States. We also assessed the association between COVID-19 related stressors and the risk of developing

1  
2  
3 anxiety disorders following the implementation of wide-spread physical distancing policies in the United  
4  
5 States.

## 6 7 **Methods**

### 8 9 **Data collection and sample**

10  
11 This analysis was based on data from our COVID-19 and Life stressors Impact on Mental Health and  
12  
13 Well-being Study (CLIMB). We collected nationally representative data using a random sample of adult  
14  
15 participants in the AmeriSpeak Panel between March 31 and April 13, 2020. AmeriSpeak is a probability-  
16  
17 based panel designed to be representative of households in the United States. The panel is funded and  
18  
19 operated by the National Opinion Research Center (NORC) at the University of Chicago and their  
20  
21 sampling frame covers approximately 97% of households in the country. The survey was offered to  
22  
23 English-speaking participants who had completed an AmeriSpeak survey in the last 6 months.

24  
25 In total, 1470 participants completed the survey, 1385 online and 85 via the phone, representing 64.3% of  
26  
27 invited panelists. From those 1470 participants, 20 had missing data on either GAD or PTSS questions,  
28  
29 which were removed; the final analysis included 1450 participants from the CLIMB study. The  
30  
31 institutional review boards of NORC and Boston University Medical Campus (H-39986) approved the  
32  
33 study. NORC obtained written consent from study participants when they first enrolled in the  
34  
35 AmeriSpeak Panel.  
36  
37

### 38 39 **Exposure variables**

40  
41 Our structured survey included questions on demographic characteristics (sex, age, race and ethnicity,  
42  
43 education, marital status, household income, household savings, and household size) and whether the  
44  
45 respondent had or knew anyone who had COVID-19. The primary exposure of interest was reporting  
46  
47 COVID-19 related stressors. The stressor list was based on prior analyses following traumatic events.<sup>16,23</sup>  
48  
49 The list included financial stressors (e.g., losing a job, having difficulty paying rent, having financial  
50  
51 problems, a member of your family losing a job, and having hours reduced at your job) and social and  
52  
53 emotional stressors (e.g., feeling alone, having relationship problems, family or relationship problems,  
54  
55 not being able to get food due to shortages, not being able to get supplies due to shortages, challenges  
56  
57  
58  
59  
60

1  
2  
3 finding childcare, not going to school, travel restrictions, seeing family less in person, and death of  
4 someone close to you due to COVID-19). We excluded stressors that were applicable to only a subset of  
5 the population, ultimately including 14 stressors in our analysis. We then created a cumulative stressor  
6 score and divided the score into three stressor categories, low (0-2 stressors), medium (3-4 stressors), and  
7 high (5-14 stressors). The score reflects the symptoms distribution in the sample with approximately one  
8 third of the sample in each category.  
9  
10  
11  
12  
13  
14

### 15 **Outcome variables**

16 For psychological assessment, we used two validated anxiety disorders questionnaires. We used the  
17 GAD-7 to assess GAD. The cutoff for probable GAD in our analysis was a score of 15 or more. This  
18 cutoff was based on the recommended cutoffs for GAD-7 to screen for GAD.<sup>24</sup> We also conducted a  
19 sensitivity analysis with a cutoff score of 10 or more. We used the 4-items PTSD checklist (PCL) to  
20 screen for PTSS. The cutoff for PTSS was three score or more.<sup>25</sup>  
21  
22  
23  
24  
25  
26  
27

### 28 **Statistical analysis**

29 We used STATA 16.1 to conduct the analysis for this study. All analyses were weighted using complex  
30 survey weights to adjust for sample selection and post-stratification. We calculated the overall prevalence  
31 of probable GAD and PTSS and the prevalence of each outcome stratified by number of stressors. We  
32 then conducted a bivariable analysis comparing probable GAD and PTSS prevalence across demographic  
33 characteristics, stressor score, and each type of stressor using a two-tailed chi-square test. We used  
34 complete case analysis for the multivariable logistic regression models to estimate the odds ratios of the  
35 association between COVID-19 related stressor score and probable GAD and PTSS when controlling for  
36 gender, age, race, education, marital status, household income, household savings, and household size. In  
37 sensitivity analysis, we included concern about COVID-19 in the multivariable logistic regression model.  
38 We also constructed other multivariable logistic regression models with the number of stressors as a  
39 continuous variable and other models that divide the stressors into two continuous variables (financial  
40 stressors and social stressors) as sensitivity analyses. We followed the Strengthening the Reporting of  
41  
42  
43  
44  
45  
46  
47  
48  
49  
50  
51  
52  
53  
54  
55  
56  
57  
58  
59  
60

1  
2  
3  
4 Observational Studies in Epidemiology (STROBE) reporting guideline for cross-sectional studies when  
5  
6  
7 designing and reporting on this analysis.

### 8 9 **Patient and public involvement**

10  
11 Patients and the public were not involved in the developing the research question, design, or  
12  
13 implementation of this analysis. This is primarily because we did not have funding to support such  
14  
15 involvement and our analysis was on a national level using validated assessment tools.

### 16 17 **Results**

18  
19 Of the 1450 participants, 10.9% (95% CI: 9.1, 13.2) reached the threshold for probable GAD, using a  
20  
21 score of 15 as a cutoff. When using a score of 10 as a cutoff point, 25% (95% CI: 22.2-28.0) reached the  
22  
23 threshold for probable GAD. In terms of PTSS, 21.7% (95% CI: 19.1-24.6) reached the threshold.

24  
25 Table 1 shows the association between demographic characteristics and the two outcomes. In particular,  
26  
27 female sex was associated with a higher prevalence of both probable GAD and PTSS in the bivariable  
28  
29 analysis. The prevalence of probable GAD was 14.1% (95% CI: 11.2-17.6) among females compared to  
30  
31 7.6% (95% CI: 5.4-10.4) among males. The prevalence of probable PTSS was 26.1% (95% CI: 22.3-30.2)  
32  
33 among females compared to 17% (95% CI: 13.5-21.2) among males. Other demographic variables  
34  
35 associated with both outcomes in the bivariable analysis were age and household savings. In the  
36  
37 multivariable analysis, reporting household savings of less than \$5,000 was a predictor of GAD (OR= 1.9,  
38  
39 95% CI: 1.2 – 3.1).

### 40 41 42 **COVID-19 related stressors and anxiety disorders**

43  
44 Higher stressor score was positively associated with, and a predictor of, both probable GAD and PTSS.  
45  
46 The prevalence of probable GAD was 4% (95% CI: 2.2-7.0) among participants with low stressor score,  
47  
48 8.6% (95% CI: 6.2-11.8) among participants with medium stressor score, and 20.5% (95% CI: 16.1-25.8)  
49  
50 among participants with high stressor score. High stressor score was a predictor of probable GAD  
51  
52 (OR=4.5, 95% CI: 2.3-8.8) compared to reporting a low stressor score (Table 1). High stressor score  
53  
54 remained a predictor of probable GAD (OR=3.5, 95% CI: 1.8-6.9) compared to reporting a low stressor  
55  
56  
57  
58  
59  
60

1  
2  
3 score after including concern about COVID-19 in the model (Appendix Table 1). In the models that  
4  
5 Included COVID-19 related stressors as a continuous variable the OR of probable GAD was 1.3 (95% CI:  
6  
7 1.2-1.4) (Appendix Table 2). Dividing COVID-19 related stressors into two continuous variables  
8  
9 depending on the nature of the stressor in the multivariable model produced consistent results for  
10  
11 financial stressors (OR=1.4, 95% CI: 1.2-1.6), and social and emotional stressors (OR=1.2, 95% CI: 1.1-  
12  
13 1.5) (Appendix Table 3).

14  
15 The prevalence of PTSS was 12.4% (95% CI: 8.9-17.0) among participants with low stressor score,  
16  
17 17.4% (95% CI: 13.6-22.0) among participants with medium stressor score, and 35.7% (95% CI: 30.2-  
18  
19 41.6) among participants with high stressor score. Reporting a high stressor score, compared to a low  
20  
21 stressor score, was a predictor of PTSS (OR=3.3, 95% CI: 2.1-5.2) (Table 1). High stressor score  
22  
23 remained a predictor of PTSS (OR=2.7, 95% CI: 1.7-4.3) compared to reporting a low stressor score after  
24  
25 including concern about COVID-19 in the model (Appendix Table 1). In the models that Included  
26  
27 COVID-19 related stressors as a continuous variable the OR was 1.3 (95% CI: 1.2-1.4) (Appendix Table  
28  
29 2). Dividing COVID-19 related stressors into two continuous variables the multivariable model  
30  
31 depending on the nature of the stressor produced consistent results for financial stressors (OR=1.3, 95%  
32  
33 CI: 1.2-1.6), and social and emotional stressors (OR=1.3, 95% CI: 1.1-1.5) (Appendix Table 3).

34  
35  
36  
37  
38  
39 Figure 1 shows that reporting any COVID-19 related stressor, except for experiencing travel restrictions,  
40  
41 was associated with higher probable GAD prevalence. The greatest difference in probable GAD  
42  
43 prevalence by COVID-19 related stressor was between participants who reported having family or  
44  
45 relationship problems (prevalence=27%, 95% CI: 19.6-36.1) compared to participants who did not report  
46  
47 family or relationship problems (prevalence=8.7%, 95% CI: 6.9-10.9). Other stressors leading to a  
48  
49 significant difference in probable GAD prevalence included feeling lonely, having difficulty paying the  
50  
51 rent, losing a job, having financial problems, and a household member losing a job. Figure 2 shows that  
52  
53 participants who reached the threshold for probable GAD reported, on average, experiencing a higher  
54  
55 number of stressors compared to participants who did not reach the threshold for probable GAD.

1  
2  
3 Figure 3 shows that reporting any COVID-19 related stressor was associated with higher PTSS  
4 prevalence. The greatest significant difference in PTSS prevalence was between participants who reported  
5 having financial problems (prevalence=37.2%, 95% CI: 31.1-43.7) compared to participants who did not  
6 report having financial problems (prevalence=15.8%, 95% CI: 13.2-18.8). Other stressors leading to a  
7 significant difference in PTSS prevalence included feeling alone, losing a job, and having difficulty  
8 paying the rent. Figure 4 shows that participants who reached the threshold for PTSS reported, on  
9 average, experienced a higher number of stressors compared to participants who did not reach the  
10 threshold for PTSS.  
11  
12  
13  
14  
15  
16  
17  
18

### 19 **Discussion**

20 In a survey of a representative sample of adults in the United States conducted between March 31 and  
21 April 13, 2020, 10.9% of adults reported a score indicative of probable GAD and 21% reported PTSS.  
22 These numbers are significantly higher than the expected prevalence of anxiety disorders in the United  
23 States. For example, the National Comorbidity Survey replication estimated that the prevalence of GAD  
24 and PTSD in the United States were 3.1% and 3.5%, respectively (collected before COVID-19).<sup>26</sup>  
25 Another analysis showed that the 12-month prevalence of GAD in United States in 2017 was 4%.<sup>27</sup>  
26 However, our results are lower than a recent analysis by Twenge and Joiner, which found that, compared  
27 to 2019, adults in the United States were more than three times as likely to screen positive for anxiety  
28 (using GAD-2) between April 23-May 2020. The study reports that on the week of May 21, 2020 29.4%  
29 of participants screened positive for GAD.<sup>17</sup> The difference in results can potentially be due to the higher  
30 threshold for screening positive for probable GAD by our screening tool.  
31  
32  
33  
34  
35  
36  
37  
38  
39  
40  
41  
42  
43  
44

45 We also found that COVID-19 related stressors were associated with participants reporting more  
46 symptoms of GAD or PTSS. The prevalence of GAD was four times higher among participants reporting  
47 five or more stressors compared to participants reporting two or fewer stressors. The prevalence of PTSS  
48 was about three times higher among participants reporting five or more stressors compared to participants  
49 reporting two or fewer COVID-19 related stressors. This reinforces the hypothesis that COVID-19  
50 behaves like a mass traumatic event, wherein experiences related to COVID-19 and its consequences are  
51  
52  
53  
54  
55  
56  
57  
58  
59  
60

1  
2  
3 directly linked to adverse mental health consequences. These results are consistent with other  
4  
5 epidemiologic analyses that studied COVID-19 stressors and mental health. For example, Fitzpatrick et  
6  
7 al. found in a nationally representative sample that fear of COVID-19 was linked to both depression and  
8  
9 anxiety, and that more than 25% of participants reported moderate to severe anxiety symptoms, which  
10  
11 may warrant clinical treatment.<sup>28</sup> Another study found that between April 13 and May 19, 2020, young  
12  
13 adults (18-20 years) reported high levels of GAD (45.4% with a 10 score cutoff) and PTSD symptoms  
14  
15 (31.8% with a 45 PCL-C score cutoff).<sup>15,28</sup> Conditions associated with anxiety disorders often also lead to  
16  
17 depression.<sup>29</sup> This is consistent with our analysis that found that the prevalence of depression symptoms  
18  
19 has risen during the study period as well.<sup>30</sup>

20  
21  
22 Our study is consistent with existing literature showing higher prevalence of anxiety disorders following  
23  
24 mass traumatic events, even if our results suggest the severity of anxiety disorders due to the COVID-19  
25  
26 pandemic is greater than that previously recorded after other mass traumas.<sup>1</sup> Agyapong et al. reported that  
27  
28 the prevalence of GAD after one month following a wildfire—which physically, emotionally, and  
29  
30 economically affected the community—was 19.8%.<sup>31</sup> Their results were based on using a score of 10  
31  
32 points on the GAD-7 scale as the cutoff. Using the same cutoff, the prevalence of probable GAD in our  
33  
34 analysis rises to 25%. Silver et al. found that 17% of the United States population that lives outside New  
35  
36 York city reported PTSS two months after the September 11 terrorist attack.<sup>32</sup>

37  
38  
39 Our study complements studies from China showing that COVID-19 has led to adverse psychological  
40  
41 consequences.<sup>9,33</sup> We add to the literature by quantifying the probable prevalence of GAD and PTSS as  
42  
43 the COVID-19 pandemic unfolded in the United States. Our results also support analysis from Nelson et  
44  
45 al. showing the widespread concerns and stressors due to COVID-19 in the United States.<sup>10</sup> Our work  
46  
47 both describes the experience of particular stressors and quantifies their contribution to the risk of  
48  
49 developing of anxiety disorders in the country. In particular, we show that financial (e.g., having  
50  
51 difficulty paying rent) and social and emotional (e.g., feeling lonely) stressors contribute to higher rates of  
52  
53 both probable GAD and PTSS, which aligns with existing literature.<sup>6</sup>

1  
2  
3 These results should be considered with the following limitations in mind. First, our study uses screeners  
4 for GAD and PTSS. A definitive diagnosis of either will require clinical assessment. As such, these  
5 results should be confirmed in a representative sample using diagnostic tools. However, both screening  
6 questionnaires in our analysis are validated tools used extensively to assess the prevalence of GAD and  
7 PTSS in the population.<sup>24,25</sup> Second, the use of a pre-specified panel can lead to selection bias. However,  
8 the AmeriSpeak Panel has been used reliably for years to provide representative samples of the United  
9 States.<sup>34</sup> Third, there are a large number of other covariates—including features of context like, for  
10 example, estimates of pandemic severity—that could be considered to more fully assess the determinants  
11 of anxiety disorders in this study. This is beyond the scope of the paper but potentially a fruitful direction  
12 for future work. Fourth, our post-only design, which does not allow for information on the mental health  
13 status of the participants prior to the pandemic, suggests that we cannot causally link the pandemic, and  
14 the policies implemented to tackle it, to a subsequent increased risk of developing of anxiety disorders.  
15 However, the specificity of stressors reported, and the high risk of developing of reported anxiety  
16 disorders, consistent with previous knowledge and expectation, strongly suggest that we are observing  
17 reliable associations that can be further examined in subsequent longitudinal work.

## 34 **Conclusion**

35  
36 The prevalence of anxiety disorders as the COVID-19 pandemic unfolded in the United States is  
37 substantially higher than the expected baseline prevalence in the United States and of the burden reported  
38 following other mass traumatic events. This potentially reflects the scale of the pandemic, the ubiquity of  
39 the impact of the policies implemented to tackle it, and the economic and social consequences of both.  
40  
41 Persons experiencing COVID-19 related stressors, particularly financial, and social and emotional  
42 stressors, were more likely to report both probable GAD and PTSS indicating the critical role these  
43 stressors are play in increasing the risk of developing of anxiety disorders in the United States. Mitigation  
44 and recovery policies should take into account the mental health toll the pandemic had on United States  
45 population.



1  
2  
3 **Contributors:** CKE and SMA developed the first draft of the survey. SG reviewed the survey. SMA  
4 conducted the data analysis and wrote the manuscript draft. CKE, GHC, and SG contributed to study  
5 conception and manuscript drafting. All authors acknowledge full responsibility for the analyses and  
6 interpretation of the report. The corresponding author attests that all listed authors meet authorship criteria  
7 and that no others meeting the criteria have been omitted.  
8  
9

10  
11  
12 **Funding:** The research was funded by the Rockefeller Foundation-Boston University 3-D Commission  
13 (grant number 2019 HTH 024). The Rockefeller Foundation had no role in the design and conduct of the  
14 study; collection, management, analysis, and interpretation of the data; preparation, review, or approval of  
15 the manuscript; or the decision to submit the manuscript for publication.  
16  
17

18  
19 **Competing interests:** All authors have completed the ICMJE uniform disclosure form at  
20 [http://www.icmje.org/coi\\_disclosure.pdf](http://www.icmje.org/coi_disclosure.pdf) and declare: support from the Rockefeller Foundation-Boston  
21 University 3-D Commission; no financial relationships with any organisation that might have an interest  
22 in the submitted work in the previous three years; no other relationships or activities that could appear to  
23 have influenced the submitted work.  
24  
25

26  
27 **Patient consent for publication:** Not required.  
28

29  
30 **Ethics approval:** The institutional review boards of NORC and Boston University Medical Campus (H-  
31 39986) approved the study. NORC obtained written consent from study participants when they first  
32 enrolled in the AmeriSpeak Panel.  
33  
34

35  
36 **Data sharing:** authors may share the data upon reasonable requests  
37  
38

39  
40 **Transparency statement:** The lead authors affirm that the manuscript is an honest, accurate, and  
41 transparent account of the study being reported; that no important aspects of the study have been omitted;  
42 and that any discrepancies from the study as planned (and, if relevant, registered) have been explained.  
43  
44

45  
46 **Dissemination to participants and related patient and public communities:** There are no immediate  
47 plans to directly disseminate the analysis results to directly to the participants o as this study analyzed  
48 deidentified data. However, we aim to widely disseminate the results through our institution website and  
49 social media outlets to reach the public.  
50  
51  
52  
53  
54  
55  
56  
57  
58  
59  
60

**Figure caption**

Figure 1: Prevalence of probable generalized anxiety disorder (GAD) for persons reporting different COVID-19 stressors

Figure 2: Distribution of number of stressors among participants depending on whether they reported symptoms consistent with probable generalized anxiety disorder (GAD) status

Figure 3: Prevalence of Post-traumatic stress symptoms (PTSS) for persons reporting different COVID-19 stressors

Figure 4: Distribution of number of stressors among participants depending on whether they reach the cut-off for post-traumatic stress symptoms (PTSS) status

For peer review only

## References

1. Goldmann E, Galea S. Mental Health Consequences of Disasters. *Annu Rev Public Health*. 2014;35(1):169-183. doi:10.1146/annurev-publhealth-032013-182435
2. Ni MY, Kim Y, McDowell I, et al. Mental health during and after protests, riots and revolutions: A systematic review. *Aust N Z J Psychiatry*. 2020;54(3):232-243. doi:10.1177/0004867419899165
3. Peng EYC, Lee MB, Tsai ST, et al. Population-based post-crisis psychological distress: An example from the SARS outbreak in Taiwan. *J Formos Med Assoc*. 2010;109(7):524-532. doi:10.1016/S0929-6646(10)60087-3
4. David D, Mellman TA, Mendoza LM, Kulick-Bell R, Ironson G, Schneiderman N. Psychiatric morbidity following Hurricane Andrew. *J Trauma Stress*. 1996;9(3):607-612. doi:10.1007/BF02103669
5. Jeong H, Yim HW, Song YJ, et al. Mental health status of people isolated due to Middle East Respiratory Syndrome. *Epidemiol Health*. 2016;38:e2016048. doi:10.4178/epih.e2016048
6. Viseu J, Leal R, de Jesus SN, Pinto P, Pechorro P, Greenglass E. Relationship between economic stress factors and stress, anxiety, and depression: Moderating role of social support. *Psychiatry Res*. 2018;268:102-107. doi:10.1016/j.psychres.2018.07.008
7. Jalloh MF, Li W, Bunnell RE, et al. Impact of Ebola experiences and risk perceptions on mental health in Sierra Leone, July 2015. *BMJ Glob Heal*. 2018;3(2):e000471. doi:10.1136/bmjgh-2017-000471
8. Galea S, Brewin CR, Gruber M, et al. Exposure to hurricane-related stressors and mental illness after Hurricane Katrina. *Arch Gen Psychiatry*. 2007;64(12):1427-1434. doi:10.1001/archpsyc.64.12.1427
9. Cao W, Fang Z, Hou G, et al. The psychological impact of the COVID-19 epidemic on college students in China. *Psychiatry Res*. 2020;287. doi:10.1016/j.psychres.2020.112934
10. Nelson LM, Simard JF, Oluyomi A, et al. US Public Concerns about the COVID-19 Pandemic from Results of a Survey Given via Social Media. *JAMA Intern Med*. 2020.

- 1  
2  
3 doi:10.1001/jamainternmed.2020.1369  
4  
5  
6 11. Okely JA, Corley J, Welstead M, et al. Change in physical activity, sleep quality, and psychosocial  
7 variables during COVID-19 lockdown: Evidence from the lothian birth cohort 1936. *Int J Environ*  
8 *Res Public Health*. 2021;18(1):1-16. doi:10.3390/ijerph18010210  
9  
10  
11 12. García-Fernández L, Romero-Ferreiro V, Padilla S, David López-Roldán P, Monzó-García M,  
12 Rodríguez-Jimenez R. Gender differences in emotional response to the COVID-19 outbreak in  
13 Spain. *Brain Behav*. 2021;11(1):e01934. doi:10.1002/brb3.1934  
14  
15  
16 13. Li J, Yang Z, Qiu H, et al. Anxiety and depression among general population in China at the peak  
17 of the COVID-19 epidemic. *World Psychiatry*. 2020;19(2):249-250. doi:10.1002/wps.20758  
18  
19  
20 14. Wang C, Pan R, Wan X, et al. Immediate psychological responses and associated factors during  
21 the initial stage of the 2019 coronavirus disease (COVID-19) epidemic among the general  
22 population in China. *Int J Environ Res Public Health*. 2020;17(5). doi:10.3390/ijerph17051729  
23  
24  
25 15. Liu CH, Zhang E, Wong GTF, Hyun S, Hahm H “Chris.” Factors associated with depression,  
26 anxiety, and PTSD symptomatology during the COVID-19 pandemic: Clinical implications for  
27 U.S. young adult mental health. *Psychiatry Res*. 2020;290:113172.  
28  
29  
30  
31  
32  
33  
34  
35  
36  
37 16. Boardman JD, Finch BK, Ellison CG, Williams DR, Jackson JS. Neighborhood disadvantage,  
38 stress, and drug use among adults. *J Health Soc Behav*. 2001;42(2):151-165. doi:10.2307/3090175  
39  
40  
41 17. Twenge JM, Joiner TE. U.S. Census Bureau-assessed prevalence of anxiety and depressive  
42 symptoms in 2019 and during the 2020 COVID-19 pandemic. *Depress Anxiety*. 2020;37(10):954-  
43  
44  
45 956. doi:10.1002/da.23077  
46  
47  
48 18. Salari N, Khazaie H, Hosseini-Far A, et al. The prevalence of stress, anxiety and depression  
49 within front-line healthcare workers caring for COVID-19 patients: a systematic review and meta-  
50  
51  
52 regression. *Hum Resour Health*. 2020;18(1):100. doi:10.1186/s12960-020-00544-1  
53  
54  
55 19. Lasheras I, Gracia-García P, Lipnicki DM, et al. Prevalence of anxiety in medical students during  
56 the covid-19 pandemic: A rapid systematic review with meta-analysis. *Int J Environ Res Public*  
57  
58  
59

- 1  
2  
3 *Health*. 2020;17(18):1-12. doi:10.3390/ijerph17186603  
4
- 5 20. Salari N, Hosseini-Far A, Jalali R, et al. Prevalence of stress, anxiety, depression among the  
6 general population during the COVID-19 pandemic: A systematic review and meta-analysis.  
7  
8 *Global Health*. 2020;16(1):57. doi:10.1186/s12992-020-00589-w  
9
- 10  
11 21. Fiorillo A, Sampogna G, Giallonardo V, et al. Effects of the lockdown on the mental health of the  
12 general population during the COVID-19 pandemic in Italy: Results from the COMET  
13 collaborative network. *Eur Psychiatry*. 2020;63(1). doi:10.1192/j.eurpsy.2020.89  
14  
15  
16  
17 22. Trappler B, Friedman S. Posttraumatic stress disorder in survivors of the Brooklyn Bridge  
18 shooting. *Am J Psychiatry*. 1996;153(5):705-707. doi:10.1176/ajp.153.5.705  
19  
20  
21  
22 23. Galea S, Tracy M, Norris F, Coffey SF. Financial and social circumstances and the incidence and  
23 course of PTSD in Mississippi during the first two years after Hurricane Katrina. *J Trauma Stress*.  
24  
25 2008;21(4):357-368. doi:10.1002/jts.20355  
26  
27  
28 24. Spitzer RL, Kroenke K, Williams JBW, Löwe B. A brief measure for assessing generalized  
29 anxiety disorder: The GAD-7. *Arch Intern Med*. 2006;166(10):1092-1097.  
30  
31  
32  
33  
34  
35 25. Bliese PD, Wright KM, Adler AB, Cabrera O, Castro CA, Hoge CW. Validating the Primary Care  
36 Posttraumatic Stress Disorder Screen and the Posttraumatic Stress Disorder Checklist With  
37 Soldiers Returning From Combat. *J Consult Clin Psychol*. 2008;76(2):272-281. doi:10.1037/0022-  
38  
39 006X.76.2.272  
40  
41  
42  
43 26. Kessler RC, Wai TC, Demler O, Walters EE. Prevalence, severity, and comorbidity of 12-month  
44 DSM-IV disorders in the National Comorbidity Survey Replication. *Arch Gen Psychiatry*.  
45  
46 2005;62(6):617-627. doi:10.1001/archpsyc.62.6.617  
47  
48  
49 27. Ruscio AM, Hallion LS, Lim CCW, et al. Cross-sectional comparison of the epidemiology of  
50 DSM-5 generalized anxiety disorder across the globe. *JAMA Psychiatry*. 2017;74(5):465-475.  
51  
52  
53  
54  
55  
56 28. Fitzpatrick KM, Harris C, Drawve G. Fear of COVID-19 and the Mental Health Consequences in  
57  
58  
59  
60

- 1  
2  
3 America. *Psychol Trauma Theory, Res Pract Policy*. 2020;12(S1). doi:10.1037/tra0000924  
4  
5 29. Bueno-Notivol J, Gracia-García P, Olaya B, Lasheras I, López-Antón R, Santabárbara J.  
6  
7 Prevalence of depression during the COVID-19 outbreak: A meta-analysis of community-based  
8  
9 studies. *Int J Clin Heal Psychol*. 2021;21(1):100196. doi:10.1016/j.ijchp.2020.07.007  
10  
11 30. Ettman CK, Abdalla SM, Cohen GH, Sampson L, Vivier PM, Galea S. Prevalence of Depression  
12  
13 Symptoms in US Adults Before and During the COVID-19 Pandemic. *JAMA Netw Open*.  
14  
15 2020;3(9):e2019686. doi:10.1001/jamanetworkopen.2020.19686  
16  
17 31. Agyapong VIO, Hrabok M, Juhas M, et al. Prevalence rates and predictors of generalized anxiety  
18  
19 disorder symptoms in residents of fort mcmurray six months after a wildfire. *Front Psychiatry*.  
20  
21 2018;9. doi:10.3389/fpsyt.2018.00345  
22  
23 32. Silver RC, Alison Holman E, McIntosh DN, Poulin M, Gil-Rivas V. Nationwide longitudinal  
24  
25 study of psychological responses to September 11. *J Am Med Assoc*. 2002;288(10):1235-1244.  
26  
27 doi:10.1001/jama.288.10.1235  
28  
29 33. Lai J, Ma S, Wang Y, et al. Factors Associated With Mental Health Outcomes Among Health Care  
30  
31 Workers Exposed to Coronavirus Disease 2019. *JAMA Netw open*. 2020;3(3):e203976.  
32  
33 doi:10.1001/jamanetworkopen.2020.3976  
34  
35 34. AmeriSpeak: NORC's Breakthrough Panel-Based Research Platform | NORC.org.  
36  
37 <https://www.norc.org/Research/Capabilities/Pages/amerispeak.aspx>. Accessed May 18, 2020.  
38  
39  
40  
41  
42  
43  
44  
45  
46  
47  
48  
49  
50  
51  
52  
53  
54  
55  
56  
57  
58  
59  
60

**Table 1: Generalized anxiety disorder (GAD) and post-traumatic distress symptoms (PTSS) in adults 18 years and older in the U.S. by demographic characteristics and COVID-19 related stressors.**

|                                 | Generalized anxiety disorder |                  |         |                     |         | Post-traumatic stress symptoms |         |                     |         |
|---------------------------------|------------------------------|------------------|---------|---------------------|---------|--------------------------------|---------|---------------------|---------|
|                                 | N (%)                        | % (95% CI)       | P-value | Odds ratio (95% CI) | P-value | % (95% CI)                     | P-value | Odds ratio (95% CI) | P-value |
| <b>Overall</b>                  | 1450                         | 10.9 (9.1–13.2)  |         |                     |         | 21.7 (19.1–24.6)               |         |                     |         |
| <b>Sex</b>                      |                              |                  |         |                     |         |                                |         |                     |         |
| Male                            | 725 (48.2)                   | 7.6 (5.4–10.4)   | 0.0018  | ref                 |         | 17 (13.5–21.2)                 | 0.0017  | ref                 |         |
| Female                          | 725 (51.8)                   | 14.1 (11.2–17.6) |         | 1.6 (0.99–2.51)     | 0.055   | 26.1 (22.3–30.2)               |         | 1.5 (1.1–2.1)       | 0.024   |
| <b>Age</b>                      |                              |                  |         |                     |         |                                |         |                     |         |
| 18-39 y                         | 623 (38.1)                   | 16.6 (13.0–21.2) | <0.0001 | ref                 |         | 26.1 (21.1–31.3)               | <0.0001 | ref                 |         |
| 40-59 y                         | 461 (32.0)                   | 9.2 (6.6–12.6)   |         | 0.6 (0.3–1.0)       | 0.035   | 25.5 (20.9–30.7)               |         | 1.0 (0.7–1.6)       | 0.850   |
| ≥60 y                           | 366 (29.9)                   | 5.6 (3.4–9.1)    |         | 0.50 (0.2–1.1)      | 0.078   | 12.0 (8.5–16.6)                |         | 0.6 (0.3–1.0)       | 0.050   |
| <b>Race/Ethnicity</b>           |                              |                  |         |                     |         |                                |         |                     |         |
| Non-Hispanic White              | 939 (62.9)                   | 10.8 (8.6–13.5)  | 0.3468  | ref                 |         | 22.0 (18.9–25.4)               | 0.1914  | ref                 |         |
| Non-Hispanic Black              | 143 (11.9)                   | 11.9 (6.8–20.1)  |         | 0.8 (0.4–1.8)       | 0.603   | 18.9 (12.5–27.6)               |         | 0.7 (0.4–1.2)       | 0.157   |
| Hispanic                        | 258 (16.7)                   | 11.3 (6.8–18.3)  |         | 0.8 (0.4–1.3)       | 0.307   | 27.0 (19.5–36.2)               |         | 1.1 (0.7–1.8)       | 0.749   |
| Non-Hispanic Asian              | 36 (3.1)                     | 0.8 (0.1–5.5)    |         | 0.1 (0.0–0.7)       | 0.023   | 8.7 (2.4–26.8)                 |         | 0.3 (0.1–1.5)       | 0.142   |
| Other                           | 74 (5.4)                     | 15.1 (7.4–28.6)  |         | 1.1 (0.4–2.7)       | 0.919   | 15.8 (7.7–29.5)                |         | 0.6 (0.3–1.2)       | 0.131   |
| <b>Education</b>                |                              |                  |         |                     |         |                                |         |                     |         |
| No high school diploma          | 67 (9.9)                     | 13.4 (6.2–26.5)  | 0.0230  | 1.3 (0.5–3.2)       | 0.643   | 19.7 (10.9–32.8)               | 0.3825  | 0.7 (0.4–1.5)       | 0.393   |
| High school grad or GED         | 276 (27.9)                   | 10.4 (6.8–15.4)  |         | 1.19 (0.6–2.4)      | 0.615   | 25.3 (19.5–32.2)               |         | 1.2 (0.7–1.9)       | 0.560   |
| Some college                    | 638 (27.6)                   | 15.8 (12.4–20.0) |         | 2.0 (1.2–3.4)       | 0.013   | 22.2 (18.48–26.49)             |         | 1.0 (0.7–1.5)       | 0.933   |
| College grad or more            | 469 (34.6)                   | 6.8 (4.7–9.7)    |         | ref                 |         | 18.9 (15.16–23.33)             |         | ref                 |         |
| <b>Marital status</b>           |                              |                  |         |                     |         |                                |         |                     |         |
| Married                         | 716 (47.8)                   | 7.6 (5.6–10.3)   | 0.0016  | ref                 |         | 19.0 (15.8–22.8)               | 0.1686  | ref                 |         |
| Widowed, divorced, or separated | 254 (18.8)                   | 10.2 (6.8–15.1)  |         | 1.3 (0.7–2.6)       | 0.392   | 20.9 (15.3–27.9)               |         | 1.1 (0.7–1.9)       | 0.693   |
| Never married                   | 345 (24.1)                   | 14.3 (10.0–20.2) |         | 1.4 (0.8–2.6)       | 0.273   | 24.9 (19.0–31.9)               |         | 1.2 (0.7–1.8)       | 0.566   |
| Living with partner             | 135 (9.3)                    | 20.8 (12.7–32.0) |         | 1.5 (0.7–2.9)       | 0.286   | 28.6 (19.5–39.8)               |         | 0.97 (0.6–1.7)      | 0.925   |
| <b>Household income</b>         |                              |                  |         |                     |         |                                |         |                     |         |
| \$0 - \$19,999                  | 251 (20.3)                   | 16.9 (11.7–23.7) | 0.0311  | 0.9 (0.4–1.9)       | 0.746   | 28.6 (21.7–36.8)               | 0.1188  | 1.2 (0.6–2.2)       | 0.660   |
| \$20,000 - \$44,999             | 358 (25.7)                   | 12.0 (8.4–17.0)  |         | 0.6 (0.3–1.3)       | 0.219   | 19.5 (15.1–24.8)               |         | 0.7 (0.4–1.2)       | 0.158   |
| \$45,000 - \$74,999             | 356 (24.8)                   | 9.0 (6.0–13.2)   |         | 0.6 (0.3–1.2)       | 0.138   | 22.0 (17.0–28.1)               |         | 0.9 (0.6–1.5)       | 0.688   |
| ≥\$75,000                       | 452 (29.2)                   | 8.5 (5.7–12.6)   |         | ref                 |         | 19.7 (15.3–25.0)               |         | ref                 |         |
| <b>Household savings</b>        |                              |                  |         |                     |         |                                |         |                     |         |
| \$0 - \$4,999                   | 578 (42.9)                   | 17.2 (13.6–21.6) | <0.0001 | 1.9 (1.2–3.1)       | 0.010   | 27.6 (23.2–32.6)               | 0.0011  | 1.2 (0.8–1.9)       | 0.349   |

|                                     |               |                       |         |                    |         |                       |         |                    |         |
|-------------------------------------|---------------|-----------------------|---------|--------------------|---------|-----------------------|---------|--------------------|---------|
| ≥\$5,000                            | 827<br>(57.1) | 6.9<br>(5.0 – 9.3)    |         | ref                |         | 18.0<br>(14.8 – 21.8) |         | ref                |         |
| <b>COVID-related stressor score</b> |               |                       |         |                    |         |                       |         |                    |         |
| Low                                 | 460<br>(31.2) | 4.0<br>(2.2 – 7.0)    | <0.0001 | ref                |         | 12.4<br>(8.9 – 17.0)  | <0.0001 | ref                |         |
| Medium                              | 544<br>(37.0) | 8.6<br>(6.2 – 11.8)   |         | 2.0<br>(1.0 – 4.0) | 0.046   | 17.4<br>(13.6 – 22.0) |         | 1.4<br>(0.9 – 2.3) | 0.139   |
| High                                | 446<br>(31.8) | 20.5<br>(16.1 – 25.8) |         | 4.5<br>(2.3 – 8.8) | <0.0001 | 35.7<br>(30.2 – 41.6) |         | 3.3<br>(2.1 – 5.2) | <0.0001 |
| Household size (mean)               | 3.2           |                       |         | 1.0<br>(0.8– 1.1)  | 0.710   |                       |         | 1.0<br>(0.9 – 1.1) | 0.910   |

All percentages are weighted. Missing data: household income (n=33), household savings (n=45), and COVID-19 stressor score (n=3). GED is the general education diploma. COVID-19 stressor score calculated from stressor summation ranging from 0-13; categories represent low (score of 0-2), medium (score of 3-4), and high (score of 5-14) exposure to stressors due to COVID-19. GAD defined by a GAD-7 score ≥15. PTSS defined by a 4-item PTSD checklist (PCL) score ≥3. Two-tailed chi-square analysis conducted for significance testing. This analysis is based on data from our COVID-19 and Life stressors Impact on Mental Health and Well-being Study (CLIMB).





\*P<0.05  
 GAD defined by a GAD-7 score ≥15. Percentages are weighted to the U.S. population. This analysis is based on data from the COVID-19 and Life stressors Impact on Mental Health and Well-being Study (CLIMB).  
 For peer review only: <http://bmjopen.bmj.com/site/about/guidelines.xhtml>

**Figure 2: Distribution of COVID-19 stressors by generalized anxiety disorder (GAD) status**



For peer review only - <http://bmjopen.bmj.com/site/about/guidelines.xhtml>

GAD defined by a GAD-7 score  $\geq 15$ . Percentages are weighted to the U.S. population. This analysis is based on data from the COVID-19 and Life stressors Impact on Mental Health and Well-being Study (CLIMB).



\*P<0.05

For peer review only - <http://bmjopen.bmj.com/site/about/guidelines.xhtml>

PTSS defined by a 4-item PTSD checklist (PCL) score  $\geq 3$ . Percentages are weighted to the U.S. population. This analysis is based on data from our COVID-19 and Life stressors Impact on Mental Health and Well-being Study (CLIMB).

**Figure 4: Distribution of COVID-19 stressors by post-traumatic stress symptoms (PTSS) status**

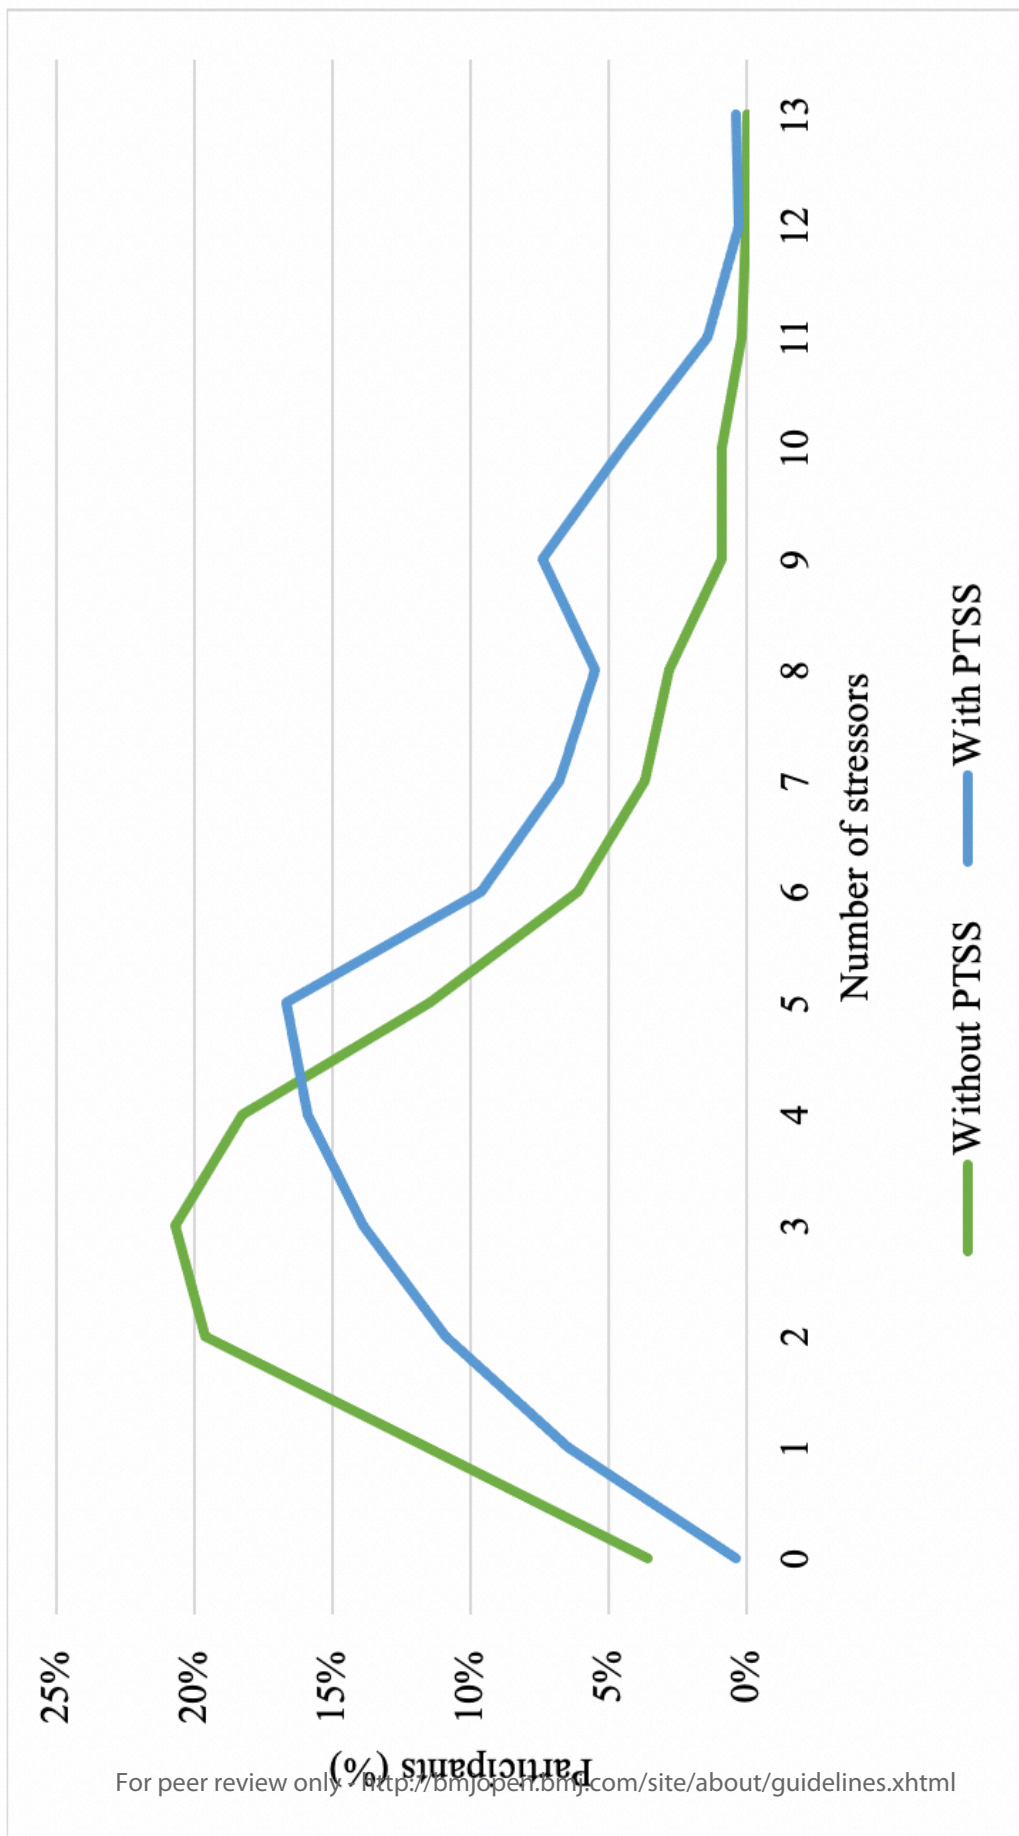

PTSS defined by a 4-item PTSD checklist (PCL) score  $\geq 3$ . Percentages are weighted to the U.S. population. This analysis is based on data from the COVID-19 and Life Stressors Impact on Mental Health and Well-being Study (CLIMB).

**Appendix Table 1: multivariable regression model of probable generalized anxiety disorder (GAD) and post-traumatic distress symptoms (PTSS) in adults 18 years and older in the U.S. by demographic characteristics and concern for COVID-19.**

|                                     | Probable GAD           |         | PTSS                   |         |
|-------------------------------------|------------------------|---------|------------------------|---------|
|                                     | Odds ratio<br>(95% CI) | P-value | Odds ratio<br>(95% CI) | P-value |
| <b>Gender</b>                       |                        |         |                        |         |
| Male                                | ref                    |         | ref                    |         |
| Female                              | 1.6<br>(1.0-2.6)       | 0.048   | 1.6<br>(1.1-2.6)       | 0.014   |
| <b>Age</b>                          |                        |         |                        |         |
| 18-39 y                             | ref                    |         | ref                    |         |
| 40-59 y                             | 1.5<br>(0.3-0.9)       | 0.012   | 1.0<br>(0.7-1.5)       | 0.949   |
| ≥60 y                               | 0.4<br>(0.2-0.9)       | 0.028   | 0.5<br>(0.3-1.0)       | 0.028   |
| <b>Race</b>                         |                        |         |                        |         |
| Non-Hispanic White                  | ref                    |         | ref                    |         |
| Non-Hispanic Black                  | 0.6<br>(0.2-1.5)       | 0.267   | 0.5<br>(0.3-1.0)       | 0.054   |
| Hispanic                            | 0.7<br>(0.4-1.2)       | 0.208   | 1.0<br>(0.6-1.7)       | 0.945   |
| Non-Hispanic Asian                  | 0.1<br>(0.01-0.7)      | 0.024   | 0.3<br>(0.1-1.4)       | 0.138   |
| Other Race – Including Multi-Racial | 1.2<br>(0.4-3.1)       | 0.764   | 0.6<br>(0.2-1.1)       | 0.160   |
| <b>Education</b>                    |                        |         |                        |         |
| No high school diploma              | 1.1<br>(0.4-3.1)       | 0.830   | 0.7<br>(0.3-1.5)       | 0.365   |
| High school graduate or equivalent  | 1.0<br>(0.5-2.0)       | 0.985   | 1.1<br>(0.7-1.8)       | 0.711   |
| Some college                        | 1.9<br>(1.1-3.3)       | 0.023   | 1.0<br>(0.7-1.5)       | 0.838   |
| College grad or more                | ref                    |         | ref                    |         |
| <b>Marital status</b>               |                        |         |                        |         |
| Married                             | ref                    |         | ref                    |         |
| Widowed, divorced, or separated     | 1.3<br>(0.7-2.7)       | 0.405   | 1.1<br>(0.6-1.9)       | 0.849   |
| Never married                       | 1.5<br>(0.8-2.8)       | 0.229   | 1.1<br>(0.7-1.8)       | 0.585   |
| Living with partner                 | 1.4<br>(0.7-3.1)       | 0.356   | 1.0<br>(0.5-1.7)       | 0.918   |
| <b>Household income</b>             |                        |         |                        |         |
| \$0 - \$19,999                      | 1.0<br>(0.5-2.2)       | 0.975   | 1.2<br>(0.7-2.4)       | 0.509   |
| \$20,000 - \$44,999                 | 0.7<br>(0.3-1.4)       | 0.290   | 0.7<br>(0.4-1.2)       | 0.230   |
| \$45,000 - \$74,999                 | 0.7<br>(0.3-1.4)       | 0.278   | 1.0<br>(0.6-1.7)       | 0.938   |
| ≥\$75,000                           | ref                    |         | ref                    |         |
| <b>Household savings</b>            |                        |         |                        |         |
| \$0 - \$4,999                       | 2.2<br>(1.3-3.6)       | 0.003   | 1.3<br>(0.8-2.0)       | 0.255   |

|                                     |                   |         |                   |         |
|-------------------------------------|-------------------|---------|-------------------|---------|
| ≥\$5,000                            | ref               |         | ref               |         |
| <b>Household size</b>               | 1.0<br>(0.8-1.1)  | 0.662   | 1.0<br>(0.9-1.1)  | 0.926   |
| <b>COVID-related stressor score</b> |                   |         |                   |         |
| Low                                 | ref               |         | ref               |         |
| Medium                              | 1.8<br>(0.9-3.6)  | 0.100   | 1.3<br>(0.8-2.0)  | 0.347   |
| High                                | 3.5<br>(1.8-6.9)  | <0.0001 | 2.7<br>(1.7-4.3)  | <0.0001 |
| <b>Concern about COVID-19</b>       |                   |         |                   |         |
| Very concerned                      | 4.1<br>(1.4-12.4) | 0.012   | 5.3<br>(1.9-14.6) | 0.004   |
| Moderately concerned                | 2.7<br>(0.9-8.2)  | 0.086   | 4.0<br>(1.5-11.0) | 0.014   |
| A little concerned                  | 0.3<br>(0.1-1.3)  | 0.112   | 1.3<br>(0.4-3.9)  | 0.784   |
| Not at all concerned                | ref               |         | ref               |         |

All percentages are weighted. Missing data: household income (n=33), household savings (n=45), and COVID-19 stressor score (n=3). GED is the general education diploma. COVID-19 stressor score calculated from stressor summation ranging from 0-13; categories represent low (score of 0-2), medium (score of 3-4), and high (score of 5-14) exposure to stressors due to COVID-19. GAD defined by a GAD-7 score ≥15. PTSS defined by a 4-item PTSD checklist (PCL) score ≥3. This analysis is based on data from our COVID-19 and Life stressors Impact on Mental Health and Well-being Study (CLIMB).

**Appendix Table 2: multivariable regression model of probable generalized anxiety disorder (GAD) and post-traumatic distress symptoms (PTSS) in adults 18 years and older in the U.S. by demographic characteristics and COVID-19 related stressors (continuous variable).**

|                                        | Probable GAD           |         | PTSS                   |         |
|----------------------------------------|------------------------|---------|------------------------|---------|
|                                        | Odds ratio<br>(95% CI) | P-value | Odds ratio<br>(95% CI) | P-value |
| <b>Gender</b>                          |                        |         |                        |         |
| Male                                   | ref                    |         | ref                    |         |
| Female                                 | 1.5<br>(1.0 – 2.4)     | 0.076   | 1.5<br>(1.0 – 2.1)     | 0.034   |
| <b>Age</b>                             |                        |         |                        |         |
| 18-39 y                                | ref                    |         | ref                    |         |
| 40-59 y                                | 0.6<br>(0.3 – 1.0)     | 0.047   | 1.1<br>(0.7 – 1.6)     | 0.805   |
| ≥60 y                                  | 0.50<br>(0.2 – 1.1)    | 0.100   | 0.6<br>(0.3 – 1.1)     | 0.082   |
| <b>Race</b>                            |                        |         |                        |         |
| Non-Hispanic White                     | ref                    |         | ref                    |         |
| Non-Hispanic Black                     | 0.8<br>(0.3 – 1.9)     | 0.583   | 0.7<br>(0.4 – 1.2)     | 0.163   |
| Hispanic                               | 0.7<br>(0.4 – 1.3)     | 0.229   | 1.0<br>(0.6 – 1.7)     | 0.882   |
| Non-Hispanic Asian                     | 0.1<br>(0.0 – 0.6)     | 0.017   | 0.3<br>(0.1 – 1.4)     | 0.126   |
| Other Race – Including<br>Multi-Racial | 1.0<br>(0.4 – 2.5)     | 0.971   | 0.5<br>(0.2 – 1.1)     | 0.084   |
| <b>Education</b>                       |                        |         |                        |         |
| No high school diploma                 | 1.1<br>(0.4 – 3.1)     | 0.860   | 0.7<br>(0.3 – 1.4)     | 0.288   |
| High school graduate or<br>equivalent  | 1.1<br>(0.5 – 2.2)     | 0.818   | 1.1<br>(0.7 – 1.8)     | 0.708   |
| Some college                           | 1.8<br>(1.0 – 3.1)     | 0.034   | 1.0<br>(0.6 – 1.4)     | 0.822   |
| College grad or more                   | ref                    |         | ref                    |         |
| <b>Marital status</b>                  |                        |         |                        |         |
| Married                                | ref                    |         | ref                    |         |
| Widowed, divorced, or<br>separated     | 1.3<br>(0.7 – 2.6)     | 0.424   | 1.1<br>(0.6 – 1.9)     | 0.758   |
| Never married                          | 1.3<br>(0.7 – 2.5)     | 0.402   | 1.1<br>(0.7 – 1.7)     | 0.753   |
| Living with partner                    | 1.4<br>(0.7 – 3.0)     | 0.322   | 0.9<br>(0.5 – 1.6)     | 0.777   |
| <b>Household income</b>                |                        |         |                        |         |
| \$0 - \$19,999                         | 0.9<br>(0.4 – 1.9)     | 0.767   | 1.2<br>(0.6 – 2.2)     | 0.652   |
| \$20,000 - \$44,999                    | 0.7<br>(0.3 – 1.4)     | 0.295   | 0.7<br>(0.4 – 1.2)     | 0.193   |

|                                |                    |        |                    |        |
|--------------------------------|--------------------|--------|--------------------|--------|
| \$45,000 - \$74,999            | 0.6<br>(0.3 – 1.2) | 0.162  | 0.9<br>(0.6 – 1.5) | 0.717  |
| ≥\$75,000                      | ref                |        | ref                |        |
| <b>Household savings</b>       |                    |        |                    |        |
| \$0 - \$4,999                  | 2.0<br>(1.2 – 3.2) | 0.008  | 1.3<br>(0.8 – 1.9) | 0.290  |
| ≥\$5,000                       | ref                |        | ref                |        |
| <b>Household size</b>          | 1.0<br>(0.8 – 1.1) | 0.631  | 1.0<br>(0.9 – 1.1) | 0.962  |
| <b>COVID-related stressors</b> | 1.3<br>(1.2 – 1.4) | <0.001 | 1.3<br>(1.2 – 1.4) | <0.001 |

All percentages are weighted. Missing data: household income (n=33), household savings (n=45), and COVID-19 stressor score (n=3). GED is the general education diploma. GAD defined by a GAD-7 score ≥15. PTSS defined by a 4-item PTSD checklist (PCL) score ≥3. This analysis is based on data from our COVID-19 and Life stressors Impact on Mental Health and Well-being Study (CLIMB).



**Appendix Table 3: multivariable regression model of probable generalized anxiety disorder (GAD) and post-traumatic distress symptoms (PTSS) in adults 18 years and older in the U.S. by demographic characteristics and COVID-19 related financial and social stressors.**

|                                        | Probable GAD           |         | PTSS                   |         |
|----------------------------------------|------------------------|---------|------------------------|---------|
|                                        | Odds ratio<br>(95% CI) | P-value | Odds ratio<br>(95% CI) | P-value |
| <b>Gender</b>                          |                        |         |                        |         |
| Male                                   | ref                    |         | ref                    |         |
| Female                                 | 1.6<br>(1.0 – 2.5)     | 0.064   | 1.5<br>(1.0 – 2.6)     | 0.032   |
| <b>Age</b>                             |                        |         |                        |         |
| 18-39 y                                | ref                    |         | ref                    |         |
| 40-59 y                                | 0.6<br>(0.3 – 1.0)     | 0.043   | 1.0<br>(0.3 – 1.0)     | 0.818   |
| ≥60 y                                  | 0.5<br>(0.2 – 1.1)     | 0.105   | 0.6<br>(0.2 – 1.1)     | 0.084   |
| <b>Race</b>                            |                        |         |                        |         |
| Non-Hispanic White                     | ref                    |         | ref                    |         |
| Non-Hispanic Black                     | 0.8<br>(0.3 – 1.8)     | 0.581   | 0.6<br>(0.3 – 1.8)     | 0.162   |
| Hispanic                               | 0.7<br>(0.4 – 1.2)     | 0.180   | 1.0<br>(0.4 – 1.2)     | 0.900   |
| Non-Hispanic Asian                     | 0.1<br>(0.0 – 0.6)     | 0.016   | 0.3<br>(0.0 – 0.6)     | 0.120   |
| Other Race – Including<br>Multi-Racial | 1.0<br>(0.4 – 2.4)     | 0.937   | 0.5<br>(0.4 – 2.4)     | 0.084   |
| <b>Education</b>                       |                        |         |                        |         |
| No high school diploma                 | 1.1<br>(0.4 – 3.0)     | 0.907   | 0.6<br>(0.4 – 3.0)     | 0.278   |
| High school graduate or<br>equivalent  | 1.1<br>(0.5 – 2.1)     | 0.892   | 1.1<br>(0.5 – 2.1)     | 0.728   |
| Some college                           | 1.8<br>(1.0 – 3.0)     | 0.041   | 1.0<br>(1.0 – 3.0)     | 0.809   |
| College grad or more                   | ref                    |         | ref                    |         |
| <b>Marital status</b>                  |                        |         |                        |         |
| Married                                | ref                    |         | ref                    |         |
| Widowed, divorced, or<br>separated     | 1.3<br>(0.7 – 2.6)     | 0.416   | 1.1<br>(0.7 – 2.6)     | 0.755   |
| Never married                          | 1.3<br>(0.7 – 2.4)     | 0.420   | 1.1<br>(0.7 – 2.4)     | 0.764   |
| Living with partner                    | 1.4<br>(0.7 – 3.0)     | 0.327   | 0.9<br>(0.7 – 3.0)     | 0.772   |
| <b>Household income</b>                |                        |         |                        |         |
| \$0 - \$19,999                         | 0.9<br>(0.4 – 1.9)     | 0.738   | 1.2<br>(0.4 – 1.9)     | 0.668   |
| \$20,000 - \$44,999                    | 0.7<br>(0.3 – 1.4)     | 0.276   | 0.7<br>(0.3 – 1.4)     | 0.195   |

|                                                     |                    |        |                    |        |
|-----------------------------------------------------|--------------------|--------|--------------------|--------|
| \$45,000 - \$74,999                                 | 0.6<br>(0.3 – 1.2) | 0.160  | 0.9<br>(0.3 – 1.2) | 0.713  |
| ≥\$75,000                                           | ref                |        | ref                |        |
| <b>Household savings</b>                            |                    |        |                    |        |
| \$0 - \$4,999                                       | 2.0<br>(1.2 – 3.2) | 0.008  | 1.3<br>(1.2 – 3.2) | 0.290  |
| ≥\$5,000                                            | ref                |        | ref                |        |
| <b>Household size</b>                               | 1.0<br>(0.8– 1.1)  | 0.627  | 1.0<br>(0.8– 1.1)  | 0.956  |
| <b>COVID-related financial stressors</b>            | 1.4<br>(1.2 – 1.6) | <0.001 | 1.3<br>(1.2 – 1.6) | <0.001 |
| <b>COVID-related social and emotional stressors</b> | 1.2<br>(1.1 – 1.5) | 0.011  | 1.3<br>(1.1 – 1.5) | <0.001 |

All percentages are weighted. Missing data: household income (n=33), household savings (n=45), and COVID-19 stressor score (n=3). GED is the general education diploma. GAD defined by a GAD-7 score  $\geq 15$ . PTSS defined by a 4-item PTSD checklist (PCL) score  $\geq 3$ . Financial stressors included losing a job, having difficulty paying rent, having financial problems, a member of your family losing a job, and having hours reduced at your job. Social and emotional stressors included feeling alone, having relationship problems, family or relationship problems, not being able to get food due to shortages, not being able to get supplies due to shortages, challenges finding childcare, not going to school, travel restrictions, seeing family less in person, and death of someone close to you due to COVID-19. This analysis is based on data from our COVID-19 and Life stressors Impact on Mental Health and Well-being Study (CLIMB).

## STROBE (Strengthening The Reporting of OBServational Studies in Epidemiology) Checklist

A checklist of items that should be included in reports of observational studies. You must report the page number in your manuscript where you consider each of the items listed in this checklist. If you have not included this information, either revise your manuscript accordingly before submitting or note N/A.

**Note:** An Explanation and Elaboration article discusses each checklist item and gives methodological background and published examples of transparent reporting. The STROBE checklist is best used in conjunction with this article (freely available on the Web sites of PLoS Medicine at <http://www.plosmedicine.org/>, Annals of Internal Medicine at <http://www.annals.org/>, and Epidemiology at <http://www.epidem.com/>). Information on the STROBE Initiative is available at [www.strobe-statement.org](http://www.strobe-statement.org).

| Section and Item     | Item No. | Recommendation                                                                                                                                                                                                                                                                                                                                                                                                                                                                 | Reported on Page No. |
|----------------------|----------|--------------------------------------------------------------------------------------------------------------------------------------------------------------------------------------------------------------------------------------------------------------------------------------------------------------------------------------------------------------------------------------------------------------------------------------------------------------------------------|----------------------|
| Title and Abstract   | 1        | (a) Indicate the study's design with a commonly used term in the title or the abstract                                                                                                                                                                                                                                                                                                                                                                                         |                      |
|                      |          | (b) Provide in the abstract an informative and balanced summary of what was done and what was found                                                                                                                                                                                                                                                                                                                                                                            |                      |
| <b>Introduction</b>  |          |                                                                                                                                                                                                                                                                                                                                                                                                                                                                                |                      |
| Background/Rationale | 2        | Explain the scientific background and rationale for the investigation being reported                                                                                                                                                                                                                                                                                                                                                                                           |                      |
| Objectives           | 3        | State specific objectives, including any prespecified hypotheses                                                                                                                                                                                                                                                                                                                                                                                                               |                      |
| <b>Methods</b>       |          |                                                                                                                                                                                                                                                                                                                                                                                                                                                                                |                      |
| Study Design         | 4        | Present key elements of study design early in the paper                                                                                                                                                                                                                                                                                                                                                                                                                        |                      |
| Setting              | 5        | Describe the setting, locations, and relevant dates, including periods of recruitment, exposure, follow-up, and data collection                                                                                                                                                                                                                                                                                                                                                |                      |
| Participants         | 6        | (a) <i>Cohort study</i> —Give the eligibility criteria, and the sources and methods of selection of participants. Describe methods of follow-up<br><br><i>Case-control study</i> —Give the eligibility criteria, and the sources and methods of case ascertainment and control selection. Give the rationale for the choice of cases and controls<br><br><i>Cross-sectional study</i> —Give the eligibility criteria, and the sources and methods of selection of participants |                      |
|                      |          | (b) <i>Cohort study</i> —For matched studies, give matching criteria and number of exposed and unexposed<br><br><i>Case-control study</i> —For matched studies, give matching criteria and the number of controls per case                                                                                                                                                                                                                                                     |                      |
| Variables            | 7        | Clearly define all outcomes, exposures, predictors, potential confounders, and effect modifiers. Give diagnostic criteria, if applicable                                                                                                                                                                                                                                                                                                                                       |                      |

| Section and Item             | Item No. | Recommendation                                                                                                                                                                                                                                                                                            | Reported on Page No. |
|------------------------------|----------|-----------------------------------------------------------------------------------------------------------------------------------------------------------------------------------------------------------------------------------------------------------------------------------------------------------|----------------------|
| Data Sources/<br>Measurement | 8*       | For each variable of interest, give sources of data and details of methods of assessment (measurement). Describe comparability of assessment methods if there is more than one group                                                                                                                      |                      |
| Bias                         | 9        | Describe any efforts to address potential sources of bias                                                                                                                                                                                                                                                 |                      |
| Study Size                   | 10       | Explain how the study size was arrived at                                                                                                                                                                                                                                                                 |                      |
| Quantitative Variables       | 11       | Explain how quantitative variables were handled in the analyses. If applicable, describe which groupings were chosen and why                                                                                                                                                                              |                      |
| Statistical Methods          | 12       | (a) Describe all statistical methods, including those used to control for confounding                                                                                                                                                                                                                     |                      |
|                              |          | (b) Describe any methods used to examine subgroups and interactions                                                                                                                                                                                                                                       |                      |
|                              |          | (c) Explain how missing data were addressed                                                                                                                                                                                                                                                               |                      |
|                              |          | (d) <i>Cohort study</i> —If applicable, explain how loss to follow-up was addressed<br><i>Case-control study</i> —If applicable, explain how matching of cases and controls was addressed<br><i>Cross-sectional study</i> —If applicable, describe analytical methods taking account of sampling strategy |                      |
|                              |          | (e) Describe any sensitivity analyses                                                                                                                                                                                                                                                                     |                      |
| <b>Results</b>               |          |                                                                                                                                                                                                                                                                                                           |                      |
| Participants                 | 13*      | (a) Report numbers of individuals at each stage of study—eg numbers potentially eligible, examined for eligibility, confirmed eligible, included in the study, completing follow-up, and analysed                                                                                                         |                      |
|                              |          | (b) Give reasons for non-participation at each stage                                                                                                                                                                                                                                                      |                      |
|                              |          | (c) Consider use of a flow diagram                                                                                                                                                                                                                                                                        |                      |
| Descriptive Data             | 14*      | (a) Give characteristics of study participants (eg demographic, clinical, social) and information on exposures and potential confounders                                                                                                                                                                  |                      |
|                              |          | (b) Indicate number of participants with missing data for each variable of interest                                                                                                                                                                                                                       |                      |
|                              |          | (c) <i>Cohort study</i> —Summarise follow-up time (eg, average and total amount)                                                                                                                                                                                                                          |                      |
| Outcome Data                 | 15*      | <i>Cohort study</i> —Report numbers of outcome events or summary measures over time                                                                                                                                                                                                                       |                      |
|                              |          | <i>Case-control study</i> —Report numbers in each exposure category, or summary measures of exposure                                                                                                                                                                                                      |                      |
|                              |          | <i>Cross-sectional study</i> —Report numbers of outcome events or summary measures                                                                                                                                                                                                                        |                      |

| Section and Item         | Item No. | Recommendation                                                                                                                                                                                               | Reported on Page No. |
|--------------------------|----------|--------------------------------------------------------------------------------------------------------------------------------------------------------------------------------------------------------------|----------------------|
| Main Results             | 16       | (a) Give unadjusted estimates and, if applicable, confounder-adjusted estimates and their precision (eg, 95% confidence interval). Make clear which confounders were adjusted for and why they were included |                      |
|                          |          | (b) Report category boundaries when continuous variables were categorized                                                                                                                                    |                      |
|                          |          | (c) If relevant, consider translating estimates of relative risk into absolute risk for a meaningful time period                                                                                             |                      |
| Other Analyses           | 17       | Report other analyses done—eg analyses of subgroups and interactions, and sensitivity analyses                                                                                                               |                      |
| <b>Discussion</b>        |          |                                                                                                                                                                                                              |                      |
| Key Results              | 18       | Summarise key results with reference to study objectives                                                                                                                                                     |                      |
| Limitations              | 19       | Discuss limitations of the study, taking into account sources of potential bias or imprecision. Discuss both direction and magnitude of any potential bias                                                   |                      |
| Interpretation           | 20       | Give a cautious overall interpretation of results considering objectives, limitations, multiplicity of analyses, results from similar studies, and other relevant evidence                                   |                      |
| Generalisability         | 21       | Discuss the generalisability (external validity) of the study results                                                                                                                                        |                      |
| <b>Other Information</b> |          |                                                                                                                                                                                                              |                      |
| Funding                  | 22       | Give the source of funding and the role of the funders for the present study and, if applicable, for the original study on which the present article is based                                                |                      |

\*Give information separately for cases and controls in case-control studies and, if applicable, for exposed and unexposed groups in cohort and cross-sectional studies.

**Once you have completed this checklist, please save a copy and upload it as part of your submission. DO NOT include this checklist as part of the main manuscript document. It must be uploaded as a separate file.**
