# Supplementary material for: Mental health consequences of COVID-19: a nationally representative cross-sectional study of pandemic-related stressors and anxiety disorders in the USA
Source: PubMed Central journal article supplement — BMJ Open. 2021 Aug 9;11(8):e044125. doi: 10.1136/bmjopen-2020-044125 (PMC8354762; doi:10.1136/bmjopen-2020-044125), 2021-08-09
Supplement: bmjopen-2020-044125supp001.pdf [file bmjopen-2020-044125supp001.pdf]

**Appendix Table 1: multivariable regression model of probable generalized anxiety disorder (GAD) and post-traumatic distress symptoms (PTSS) in adults 18 years and older in the U.S. by demographic characteristics and concern for COVID-19.**

|                                     | Probable GAD           |         | PTSS                   |         |
|-------------------------------------|------------------------|---------|------------------------|---------|
|                                     | Odds ratio<br>(95% CI) | P-value | Odds ratio<br>(95% CI) | P-value |
| <b>Gender</b>                       |                        |         |                        |         |
| Male                                | ref                    |         | ref                    |         |
| Female                              | 1.6<br>(1.0-2.6)       | 0.048   | 1.6<br>(1.1-2.6)       | 0.014   |
| <b>Age</b>                          |                        |         |                        |         |
| 18-39 y                             | ref                    |         | ref                    |         |
| 40-59 y                             | 1.5<br>(0.3-0.9)       | 0.012   | 1.0<br>(0.7-1.5)       | 0.949   |
| ≥60 y                               | 0.4<br>(0.2-0.9)       | 0.028   | 0.5<br>(0.3-1.0)       | 0.028   |
| <b>Race</b>                         |                        |         |                        |         |
| Non-Hispanic White                  | ref                    |         | ref                    |         |
| Non-Hispanic Black                  | 0.6<br>(0.2-1.5)       | 0.267   | 0.5<br>(0.3-1.0)       | 0.054   |
| Hispanic                            | 0.7<br>(0.4-1.2)       | 0.208   | 1.0<br>(0.6-1.7)       | 0.945   |
| Non-Hispanic Asian                  | 0.1<br>(0.01-0.7)      | 0.024   | 0.3<br>(0.1-1.4)       | 0.138   |
| Other Race – Including Multi-Racial | 1.2<br>(0.4-3.1)       | 0.764   | 0.6<br>(0.2-1.1)       | 0.160   |
| <b>Education</b>                    |                        |         |                        |         |
| No high school diploma              | 1.1<br>(0.4-3.1)       | 0.830   | 0.7<br>(0.3-1.5)       | 0.365   |
| High school graduate or equivalent  | 1.0<br>(0.5-2.0)       | 0.985   | 1.1<br>(0.7-1.8)       | 0.711   |
| Some college                        | 1.9<br>(1.1-3.3)       | 0.023   | 1.0<br>(0.7-1.5)       | 0.838   |
| College grad or more                | ref                    |         | ref                    |         |
| <b>Marital status</b>               |                        |         |                        |         |
| Married                             | ref                    |         | ref                    |         |
| Widowed, divorced, or separated     | 1.3<br>(0.7-2.7)       | 0.405   | 1.1<br>(0.6-1.9)       | 0.849   |
| Never married                       | 1.5<br>(0.8-2.8)       | 0.229   | 1.1<br>(0.7-1.8)       | 0.585   |
| Living with partner                 | 1.4<br>(0.7-3.1)       | 0.356   | 1.0<br>(0.5-1.7)       | 0.918   |
| <b>Household income</b>             |                        |         |                        |         |
| \$0 - \$19,999                      | 1.0<br>(0.5-2.2)       | 0.975   | 1.2<br>(0.7-2.4)       | 0.509   |
| \$20,000 - \$44,999                 | 0.7<br>(0.3-1.4)       | 0.290   | 0.7<br>(0.4-1.2)       | 0.230   |
| \$45,000 - \$74,999                 | 0.7<br>(0.3-1.4)       | 0.278   | 1.0<br>(0.6-1.7)       | 0.938   |
| ≥\$75,000                           | ref                    |         | ref                    |         |
| <b>Household savings</b>            |                        |         |                        |         |
| \$0 - \$4,999                       | 2.2<br>(1.3-3.6)       | 0.003   | 1.3<br>(0.8-2.0)       | 0.255   |

|                                     |                   |         |                   |         |
|-------------------------------------|-------------------|---------|-------------------|---------|
| ≥\$5,000                            | ref               |         | ref               |         |
| <b>Household size</b>               | 1.0<br>(0.8-1.1)  | 0.662   | 1.0<br>(0.9-1.1)  | 0.926   |
| <b>COVID-related stressor score</b> |                   |         |                   |         |
| Low                                 | ref               |         | ref               |         |
| Medium                              | 1.8<br>(0.9-3.6)  | 0.100   | 1.3<br>(0.8-2.0)  | 0.347   |
| High                                | 3.5<br>(1.8-6.9)  | <0.0001 | 2.7<br>(1.7-4.3)  | <0.0001 |
| <b>Concern about COVID-19</b>       |                   |         |                   |         |
| Very concerned                      | 4.1<br>(1.4-12.4) | 0.012   | 5.3<br>(1.9-14.6) | 0.004   |
| Moderately concerned                | 2.7<br>(0.9-8.2)  | 0.086   | 4.0<br>(1.5-11.0) | 0.014   |
| A little concerned                  | 0.3<br>(0.1-1.3)  | 0.112   | 1.3<br>(0.4-3.9)  | 0.784   |
| Not at all concerned                | ref               |         | ref               |         |

All percentages are weighted. Missing data: household income (n=33), household savings (n=45), and COVID-19 stressor score (n=3). GED is the general education diploma. COVID-19 stressor score calculated from stressor summation ranging from 0-13; categories represent low (score of 0-2), medium (score of 3-4), and high (score of 5-14) exposure to stressors due to COVID-19. GAD defined by a GAD-7 score ≥15. PTSS defined by a 4-item PTSD checklist (PCL) score ≥3. This analysis is based on data from our COVID-19 and Life stressors Impact on Mental Health and Well-being Study (CLIMB).

**Appendix Table 2: multivariable regression model of probable generalized anxiety disorder (GAD) and post-traumatic distress symptoms (PTSS) in adults 18 years and older in the U.S. by demographic characteristics and COVID-19 related stressors (continuous variable).**

|                                        | Probable GAD           |         | PTSS                   |         |
|----------------------------------------|------------------------|---------|------------------------|---------|
|                                        | Odds ratio<br>(95% CI) | P-value | Odds ratio<br>(95% CI) | P-value |
| <b>Gender</b>                          |                        |         |                        |         |
| Male                                   | ref                    |         | ref                    |         |
| Female                                 | 1.5<br>(1.0 – 2.4)     | 0.076   | 1.5<br>(1.0 – 2.1)     | 0.034   |
| <b>Age</b>                             |                        |         |                        |         |
| 18-39 y                                | ref                    |         | ref                    |         |
| 40-59 y                                | 0.6<br>(0.3 – 1.0)     | 0.047   | 1.1<br>(0.7 – 1.6)     | 0.805   |
| ≥60 y                                  | 0.50<br>(0.2 – 1.1)    | 0.100   | 0.6<br>(0.3 – 1.1)     | 0.082   |
| <b>Race</b>                            |                        |         |                        |         |
| Non-Hispanic White                     | ref                    |         | ref                    |         |
| Non-Hispanic Black                     | 0.8<br>(0.3 – 1.9)     | 0.583   | 0.7<br>(0.4 – 1.2)     | 0.163   |
| Hispanic                               | 0.7<br>(0.4 – 1.3)     | 0.229   | 1.0<br>(0.6 – 1.7)     | 0.882   |
| Non-Hispanic Asian                     | 0.1<br>(0.0 – 0.6)     | 0.017   | 0.3<br>(0.1 – 1.4)     | 0.126   |
| Other Race – Including<br>Multi-Racial | 1.0<br>(0.4 – 2.5)     | 0.971   | 0.5<br>(0.2 – 1.1)     | 0.084   |
| <b>Education</b>                       |                        |         |                        |         |
| No high school diploma                 | 1.1<br>(0.4 – 3.1)     | 0.860   | 0.7<br>(0.3 – 1.4)     | 0.288   |
| High school graduate or<br>equivalent  | 1.1<br>(0.5 – 2.2)     | 0.818   | 1.1<br>(0.7 – 1.8)     | 0.708   |
| Some college                           | 1.8<br>(1.0 – 3.1)     | 0.034   | 1.0<br>(0.6 – 1.4)     | 0.822   |
| College grad or more                   | ref                    |         | ref                    |         |
| <b>Marital status</b>                  |                        |         |                        |         |
| Married                                | ref                    |         | ref                    |         |
| Widowed, divorced, or<br>separated     | 1.3<br>(0.7 – 2.6)     | 0.424   | 1.1<br>(0.6 – 1.9)     | 0.758   |
| Never married                          | 1.3<br>(0.7 – 2.5)     | 0.402   | 1.1<br>(0.7 – 1.7)     | 0.753   |
| Living with partner                    | 1.4<br>(0.7 – 3.0)     | 0.322   | 0.9<br>(0.5 – 1.6)     | 0.777   |
| <b>Household income</b>                |                        |         |                        |         |
| \$0 - \$19,999                         | 0.9<br>(0.4 – 1.9)     | 0.767   | 1.2<br>(0.6 – 2.2)     | 0.652   |
| \$20,000 - \$44,999                    | 0.7<br>(0.3 – 1.4)     | 0.295   | 0.7<br>(0.4 – 1.2)     | 0.193   |

|                                |                    |        |                    |        |
|--------------------------------|--------------------|--------|--------------------|--------|
| \$45,000 - \$74,999            | 0.6<br>(0.3 – 1.2) | 0.162  | 0.9<br>(0.6 – 1.5) | 0.717  |
| ≥\$75,000                      | ref                |        | ref                |        |
| <b>Household savings</b>       |                    |        |                    |        |
| \$0 - \$4,999                  | 2.0<br>(1.2 – 3.2) | 0.008  | 1.3<br>(0.8 – 1.9) | 0.290  |
| ≥\$5,000                       | ref                |        | ref                |        |
| <b>Household size</b>          | 1.0<br>(0.8 – 1.1) | 0.631  | 1.0<br>(0.9 – 1.1) | 0.962  |
| <b>COVID-related stressors</b> | 1.3<br>(1.2 – 1.4) | <0.001 | 1.3<br>(1.2 – 1.4) | <0.001 |

All percentages are weighted. Missing data: household income (n=33), household savings (n=45), and COVID-19 stressor score (n=3). GED is the general education diploma. GAD defined by a GAD-7 score ≥15. PTSS defined by a 4-item PTSD checklist (PCL) score ≥3. This analysis is based on data from our COVID-19 and Life stressors Impact on Mental Health and Well-being Study (CLIMB).

**Appendix Table 3: multivariable regression model of probable generalized anxiety disorder (GAD) and post-traumatic distress symptoms (PTSS) in adults 18 years and older in the U.S. by demographic characteristics and COVID-19 related financial and social stressors.**

|                                        | Probable GAD           |         | PTSS                   |         |
|----------------------------------------|------------------------|---------|------------------------|---------|
|                                        | Odds ratio<br>(95% CI) | P-value | Odds ratio<br>(95% CI) | P-value |
| <b>Gender</b>                          |                        |         |                        |         |
| Male                                   | ref                    |         | ref                    |         |
| Female                                 | 1.6<br>(1.0 – 2.5)     | 0.064   | 1.5<br>(1.0 – 2.6)     | 0.032   |
| <b>Age</b>                             |                        |         |                        |         |
| 18-39 y                                | ref                    |         | ref                    |         |
| 40-59 y                                | 0.6<br>(0.3 – 1.0)     | 0.043   | 1.0<br>(0.3 – 1.0)     | 0.818   |
| ≥60 y                                  | 0.5<br>(0.2 – 1.1)     | 0.105   | 0.6<br>(0.2 – 1.1)     | 0.084   |
| <b>Race</b>                            |                        |         |                        |         |
| Non-Hispanic White                     | ref                    |         | ref                    |         |
| Non-Hispanic Black                     | 0.8<br>(0.3 – 1.8)     | 0.581   | 0.6<br>(0.3 – 1.8)     | 0.162   |
| Hispanic                               | 0.7<br>(0.4 – 1.2)     | 0.180   | 1.0<br>(0.4 – 1.2)     | 0.900   |
| Non-Hispanic Asian                     | 0.1<br>(0.0 – 0.6)     | 0.016   | 0.3<br>(0.0 – 0.6)     | 0.120   |
| Other Race – Including<br>Multi-Racial | 1.0<br>(0.4 – 2.4)     | 0.937   | 0.5<br>(0.4 – 2.4)     | 0.084   |
| <b>Education</b>                       |                        |         |                        |         |
| No high school diploma                 | 1.1<br>(0.4 – 3.0)     | 0.907   | 0.6<br>(0.4 – 3.0)     | 0.278   |
| High school graduate or<br>equivalent  | 1.1<br>(0.5 – 2.1)     | 0.892   | 1.1<br>(0.5 – 2.1)     | 0.728   |
| Some college                           | 1.8<br>(1.0 – 3.0)     | 0.041   | 1.0<br>(1.0 – 3.0)     | 0.809   |
| College grad or more                   | ref                    |         | ref                    |         |
| <b>Marital status</b>                  |                        |         |                        |         |
| Married                                | ref                    |         | ref                    |         |
| Widowed, divorced, or<br>separated     | 1.3<br>(0.7 – 2.6)     | 0.416   | 1.1<br>(0.7 – 2.6)     | 0.755   |
| Never married                          | 1.3<br>(0.7 – 2.4)     | 0.420   | 1.1<br>(0.7 – 2.4)     | 0.764   |
| Living with partner                    | 1.4<br>(0.7 – 3.0)     | 0.327   | 0.9<br>(0.7 – 3.0)     | 0.772   |
| <b>Household income</b>                |                        |         |                        |         |
| \$0 - \$19,999                         | 0.9<br>(0.4 – 1.9)     | 0.738   | 1.2<br>(0.4 – 1.9)     | 0.668   |
| \$20,000 - \$44,999                    | 0.7<br>(0.3 – 1.4)     | 0.276   | 0.7<br>(0.3 – 1.4)     | 0.195   |

|                                                     |                    |        |                    |        |
|-----------------------------------------------------|--------------------|--------|--------------------|--------|
| \$45,000 - \$74,999                                 | 0.6<br>(0.3 – 1.2) | 0.160  | 0.9<br>(0.3 – 1.2) | 0.713  |
| ≥\$75,000                                           | ref                |        | ref                |        |
| <b>Household savings</b>                            |                    |        |                    |        |
| \$0 - \$4,999                                       | 2.0<br>(1.2 – 3.2) | 0.008  | 1.3<br>(1.2 – 3.2) | 0.290  |
| ≥\$5,000                                            | ref                |        | ref                |        |
| <b>Household size</b>                               | 1.0<br>(0.8– 1.1)  | 0.627  | 1.0<br>(0.8– 1.1)  | 0.956  |
| <b>COVID-related financial stressors</b>            | 1.4<br>(1.2 – 1.6) | <0.001 | 1.3<br>(1.2 – 1.6) | <0.001 |
| <b>COVID-related social and emotional stressors</b> | 1.2<br>(1.1 – 1.5) | 0.011  | 1.3<br>(1.1 – 1.5) | <0.001 |

All percentages are weighted. Missing data: household income (n=33), household savings (n=45), and COVID-19 stressor score (n=3). GED is the general education diploma. GAD defined by a GAD-7 score  $\geq 15$ . PTSS defined by a 4-item PTSD checklist (PCL) score  $\geq 3$ . Financial stressors included losing a job, having difficulty paying rent, having financial problems, a member of your family losing a job, and having hours reduced at your job. Social and emotional stressors included feeling alone, having relationship problems, family or relationship problems, not being able to get food due to shortages, not being able to get supplies due to shortages, challenges finding childcare, not going to school, travel restrictions, seeing family less in person, and death of someone close to you due to COVID-19. This analysis is based on data from our COVID-19 and Life stressors Impact on Mental Health and Well-being Study (CLIMB).
